# Supplementary material for: Expedient deaminative phosphorylation and sulfonylation of benzylic tertiary amines enabled by difluorocarbene
Source: Royal Society of Chemistry journal article supplement (doi:10.1039/d4qo00412d), 2024-01-01
Supplement: d4qo00412d1.pdf [file d4qo00412d1.pdf]

## Supplementary Information

*for*

### **Expedient Deaminative Phosphorylation and Sulfonylation of Benzylic Tertiary Amines Enabled by Difluorocarbene**

Chengbo Li<sup>a</sup>, Yu Guo<sup>a</sup>, Jianke Su<sup>a</sup>, Xinyuan Hu<sup>a</sup>, Qingqing Xuan<sup>a\*</sup> and Qiuling Song<sup>a,b,c,d\*</sup>

<sup>a</sup>*Institute of Next Generation Matter Transformation, College of Material Sciences Engineering, Huaqiao University, Xiamen, Fujian, 361021, China*

<sup>b</sup>*Key Laboratory of Molecule Synthesis and Function Discovery, Fujian Province University, College of Chemistry at Fuzhou University, Fuzhou, Fujian, 350108, China.*

<sup>c</sup>*State Key Laboratory of Organometallic Chemistry, Shanghai Institute of Organic Chemistry, Chinese Academy of Sciences, Shanghai 200032, P R China*

<sup>d</sup>*School of Chemistry and Chemical Engineering, Henan Normal University, Xinxiang, Henan, 453007, China.*

*\*email: [qsong@fzu.edu.cn](mailto:qsong@fzu.edu.cn)  
[xuanqingqing@hqu.edu.cn](mailto:xuanqingqing@hqu.edu.cn)*

## Table of Contents

|                                              |    |
|----------------------------------------------|----|
| 1. Supplementary methods .....               | 3  |
| 1.1 General information .....                | 3  |
| 1.2 General process .....                    | 3  |
| 2. Supplementary discussion .....            | 8  |
| 2.1 Optimization studies .....               | 8  |
| 2.2 Crystal data .....                       | 13 |
| 2.3 Characterization data for products ..... | 14 |
| 2.4 NMR spectroscopic data .....             | 38 |
| 2.5 HPLC spectra .....                       | 97 |
| 2.6 References .....                         | 99 |

## 1. Supplementary methods

### 1.1 General information

All chemicals were purchased from Leyan.com (BrCF<sub>2</sub>COOK, BrCF<sub>2</sub>COONa), Energy chemical company (BrCF<sub>2</sub>COOEt, BrCF<sub>2</sub>PO(OEt)<sub>2</sub>, ClCF<sub>2</sub>COONa), Adamas Reagent, Bide Pharmatech Ltd (TMSCF<sub>2</sub>Br), and Shang Fluoro Company (ClCF<sub>2</sub>H). Unless otherwise stated, all experiments were conducted in a sealed tube under N<sub>2</sub> atmosphere. Reactions were monitored by TLC or GC-MS analysis. Flash column chromatography was performed over silica gel (200-300 mesh).

<sup>1</sup>H-NMR and <sup>13</sup>C-NMR spectra were recorded in CDCl<sub>3</sub> and DMSO-d<sub>6</sub> on a Bruker Avance 500 spectrometer (500 MHz <sup>1</sup>H, 125 MHz <sup>13</sup>C (CPD), 202 MHz <sup>31</sup>P, 470 MHz <sup>19</sup>F) at room temperature. Chemical shifts were reported in ppm on the scale relative to CDCl<sub>3</sub> (δ = 7.26 for <sup>1</sup>H-NMR, δ = 77.00 for <sup>13</sup>C-NMR) as an internal reference. Coupling constants (*J*) were reported in Hertz (Hz).

### 1.2 General process

#### General process 1: Preparation of allylic amines 1

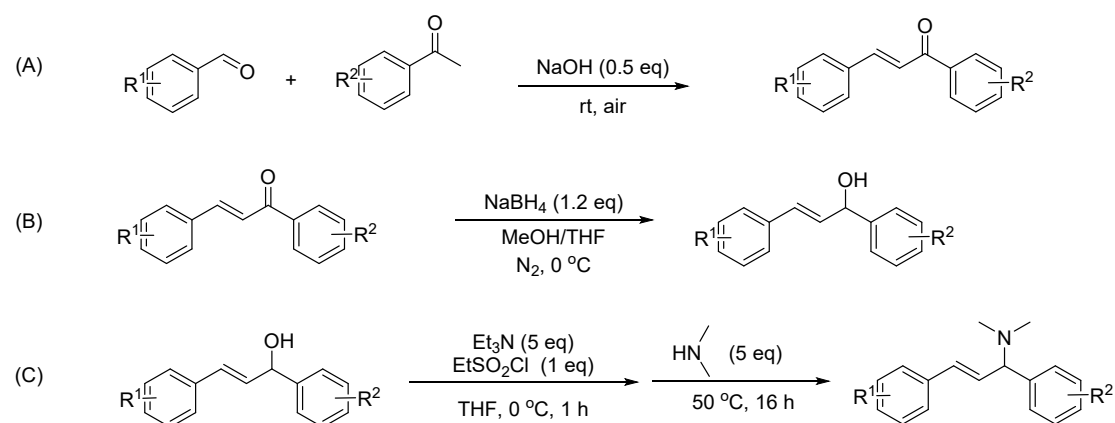

**General process 1A:**<sup>[1]</sup> NaOH (75 mg, 0.5 equiv) was added under stirring to a solution of Acetophenone (3 mmol, 1 equiv) and Benzaldehyde (3 mmol, 1 equiv) in ethanol (2 mL). The mixture was stirred for 24 h at room temperature. After, the

reaction mixture was neutralized with HCl 5% until pH  $\approx$  7 and extracted with ethyl acetate (3  $\times$  30 mL). Then, the organic layer was dried, concentrated, and purified by flash column chromatography (silica gel, petroleum ether: EtOAc =30:1, v/v) to give the desired products

**General process 1B<sup>[2]</sup>:** Under argon atmosphere, NaBH<sub>4</sub> (1.2 equiv.) was added to a stirred solution of chalcone (1.0 equiv) in dry THF and methanol at 0 °C. The reaction mixture was stirred at 0 °C for 1 hour, and the reaction was quenched with water. Then, water (20 mL) was added and the mixture was extracted with EtOAc (3  $\times$  30 mL). Then, the organic layer was dried, concentrated, and purified by flash column chromatography (silica gel, petroleum ether: EtOAc =10:1, v/v) to give the desired products.

**General process 1C<sup>[2]</sup>:** To a solution of the alcohol (1 equiv) and triethylamine (5 equiv) was added Ethanesulfonyl chloride (1 equiv) at 0 °C. The reaction was stirred for 1h at room temperature and then, a solution of dimethylamine (2 M in THF, 5 equiv) was added to the mixture. The temperature was raised to 50 °C and the reaction mixture was stirred for 16 h. Then, the organic layer was dried, concentrated, and purified by flash column chromatography (silica gel, petroleum ether: EtOAc =3:1, v/v) to give the desired products.

**General process 2<sup>[3]</sup>: Preparation of 1H-indol-3-yl methaneamines 1**

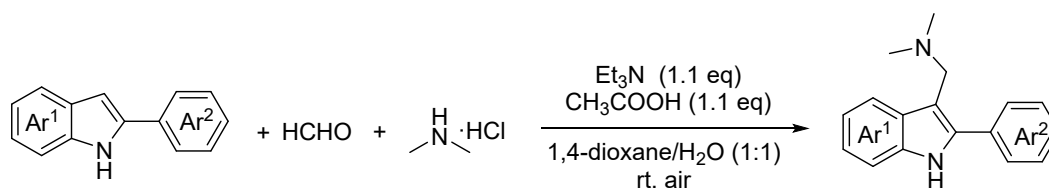

A three-necked round bottom flask equipped with a magnetic stirring bar and a dropping funnel was charged with a mixture of formaldehyde (37 wt% in water, 1.1 equiv), water (15 mL), Et<sub>3</sub>N (1.1 equiv), dimethylamine hydrochloride (1.1 equiv), indole (10 mmol, 1.1 equiv) and glacial acetic acid (1.5 equiv) in dioxane (15 mL). The mixture was stirred for 24 h at room temperature. The mixture was extracted with EtOAc (3  $\times$  30 mL). Then, the organic layer was dried, concentrated, and purified by

flash column chromatography (silica gel, petroleum ether: EtOAc =1:1, v/v) to give the desired products.

**General process 3: For synthesis of diarylmethyl alkynes 2<sup>[4]</sup>**

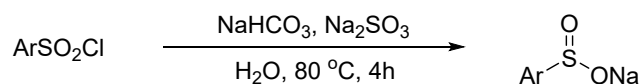

Sodium sulfite (20.0 mmol, 2.0 equiv), sodium bicarbonate (20.0 mmol, 2.0 equiv) and the corresponding aryl sulfonyl chloride (10.0 mmol, 1.0 equiv) were dissolved in distilled water (10.0 mL). The reaction mixture was stirred for 4 h at 80 °C using oil bath. After cooling down to room temperature, water was removed in vacuo. Ethanol (25 mL) was then added to this white residue and the resulting heterogeneous solution was filtered. The filtrate was concentrated under reduced pressure and the desired sodium sulfinates were obtained as white crystalline powders in 82-96% yields.

**General process 4: For synthesis of diarylmethylenes 4 and 5**

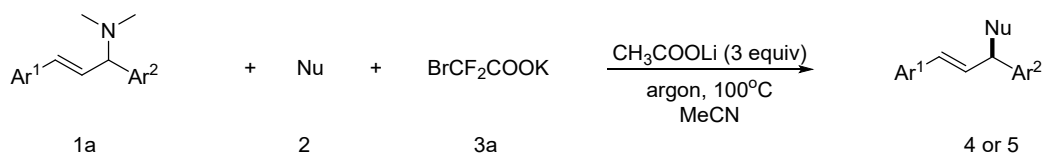

In air, amines (0.20 mmol), BrCF<sub>2</sub>COOK (3.0 eq, 0.6 mmol) CH<sub>3</sub>COOLi (3.0 eq, 0.6 mmol) (**Only when Ph<sub>2</sub>P(O)H is used as a nucleophilic reagent, the base is required**) and nucleophile (1.0 eq, 0.2 mmol) were added to a Schlenk tube equipped with a stir bar. The vessel was evacuated and filled with argon (three cycles). CH<sub>3</sub>CN (2 mL) was added by syringe under argon atmosphere. The resulting reaction mixture was stirred vigorously at 100 °C for 12 h. Upon completion of the reaction, the solvent was evaporated under reduced pressure and the residue was purified by flash column chromatography (silica gel, petroleum ether: ethyl acetate =5:1~1:1, v/v) to give the desired products.

**General process 5: Gram-scale synthesis of 4a**

In air, propargyl amines **1a** or allylic amines **5a** (1.0 eq, 5.0 mmol), BrCF<sub>2</sub>COOK (3.0eq, 15.0 mmol), CH<sub>3</sub>COOLi (3.0 eq, 15.0 mmol) and diphenylphosphine oxide (1.0 eq, 5.0 mmol) were added to a Schlenk tube equipped with a stir bar. The vessel was evacuated and filled with argon (three cycles). CH<sub>3</sub>CN (15 mL) was added by syringe under argon atmosphere. The resulting reaction mixture was stirred vigorously at 100 °C for 24 h. Upon completion of the reaction, the solvent was evaporated under reduced pressure and the residue was purified by flash column chromatography (silica gel, petroleum ether: ethyl acetate = 3:1, v/v) to give the desired products.

**General process 6: For synthesis of *N,N*-dimethyl-4-phenylbut-3-yn-2-amine**

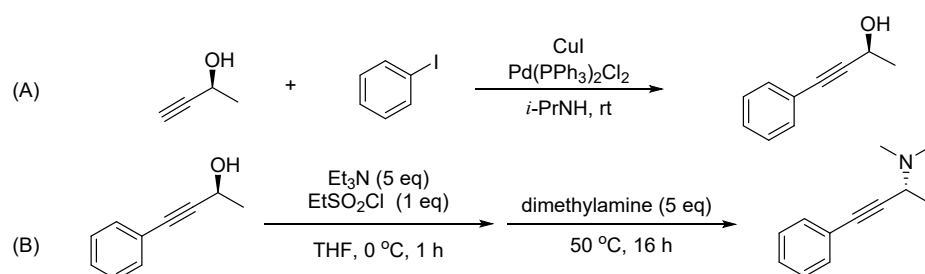

**General process 6A:** To an oven-dried round bottom flask was added the corresponding aryl iodide (1.2 equiv), Pd(PPh<sub>3</sub>)<sub>2</sub>Cl<sub>2</sub> (0.04 equiv) and copper(I) iodide (0.08 equiv). The flask was connected to an argon-vacuum line, evacuated and backfilled with argon (Three times). Diisopropylamine (2.8 mL/mmol alcohol) was added and the reaction mixture was stirred at 0 °C for 5 min. 3-Butyn-2-ol (1 equiv) was added dropwise at 0 °C and the reaction mixture was stirred for 16 h at room temperature. Silica gel was added to the mixture and the solvent was removed under reduced pressure. The crude product was purified by flash column chromatography using the appropriate mixture of solvents.

**General process 6B:** Solution of phenylacetylene (10 mmol, 1.1 equiv) in anhydrous THF (10 mL) was cooled to -78 °C, 2.5 M solution of *n*-butyllithium in THF (4.8 mL, 12 mmol; 1.2 equiv) was added dropwise, and solution was stirred with cooling under an argon atmosphere for 1 h. Then, solution of corresponding aldehyde (10 mmol, 1.0 equiv) in anhydrous THF (5 mL) was added dropwise and solution was warmed to room temperature for 1 h. Then, water (20 mL) was added and the mixture

was extracted with EtOAc (3 × 30 mL). Then, the organic layer was dried, concentrated, and purified by flash column chromatography (silica gel, petroleum ether: EtOAc =10:1, v/v) to give the desired products.

**General process 7: For synthesis of (S)-(4-phenylbut-3-yn-2-yl)(p-tolyl)sulfane**

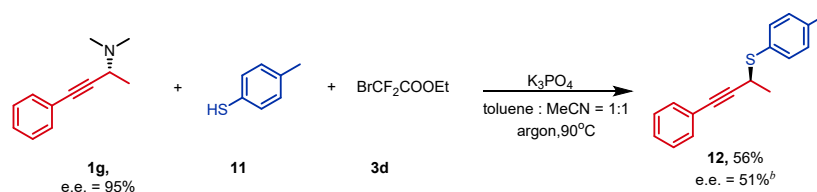

In air, amines (0.20 mmol), BrCF<sub>2</sub>COOEt (3.0 eq, 0.6 mmol), K<sub>3</sub>PO<sub>4</sub> (3.0 eq, 0.6 mmol and p-Toluenethiol (1.5 eq, 0.3 mmol) were added to a Schlenk tube equipped with a stir bar. The vessel was evacuated and filled with argon (three cycles). CH<sub>3</sub>CN (2 mL) was added by syringe under argon atmosphere. The resulting reaction mixture was stirred vigorously at 90 °C for 12 h. Upon completion of the reaction, the solvent was evaporated under reduced pressure and the residue was purified by flash column chromatography (silica gel, petroleum ether: Dichloromethane =100:1, v/v) to give the desired products.

## 2. Supplementary discussion

### 2.1 Optimization studies

#### 1.1.1 The condition screening for the diarylmethyl alkynes synthesis

Supplementary Table 1. The effects of base

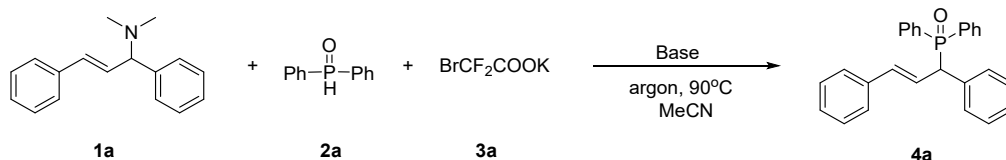

| Entries | Base                                  | Yield (%) <sup>a</sup> |
|---------|---------------------------------------|------------------------|
| 1       | Li <sub>2</sub> CO <sub>3</sub>       | 51                     |
| 2       | Na <sub>2</sub> CO <sub>3</sub>       | 42                     |
| 3       | K <sub>2</sub> CO <sub>3</sub>        | 35                     |
| 4       | Rb <sub>2</sub> CO <sub>3</sub>       | 37                     |
| 5       | CS <sub>2</sub> CO <sub>3</sub>       | 27                     |
| 6       | K <sub>3</sub> PO <sub>4</sub>        | 30                     |
| 7       | Na <sub>2</sub> HPO <sub>4</sub>      | 41                     |
| 8       | K <sub>3</sub> PO <sub>4</sub>        | 30                     |
| 9       | Na <sub>3</sub> PO <sub>4</sub>       | 34                     |
| 10      | LiOH                                  | 40                     |
| 11      | LiF                                   | 42                     |
| 12      | KHF <sub>2</sub>                      | 39                     |
| 13      | KF                                    | 58                     |
| 14      | CSF                                   | 45                     |
| 15      | HCOOLi                                | 53                     |
| 16      | HCOONa                                | 42                     |
| 17      | CH <sub>3</sub> COOLi                 | 61                     |
| 18      | CH <sub>3</sub> COONa                 | 51                     |
| 19      | CH <sub>3</sub> COOCs                 | 19                     |
| 20      | CH <sub>3</sub> OLi                   | Trace                  |
| 21      | KO <sup>t</sup> Bu                    | Trace                  |
| 22      | K <sub>2</sub> S                      | Trace                  |
| 23      | NaOTf                                 | Trace                  |
| 24      | NaBO <sub>3</sub> · 4H <sub>2</sub> O | Trace                  |



Reaction condition: **1a** (1.0 equiv., 0.2 mmol), **2a** (1.5 equiv., 0.2 mmol), BrCF<sub>2</sub>COOK (3.0 eq, 0.6 mmol) base (3 equiv.), CH<sub>3</sub>CN (2 mL) at 90 °C for 12 h under argon; <sup>a</sup> isolated yields.

Supplementary Table 2. The effects of leaving group

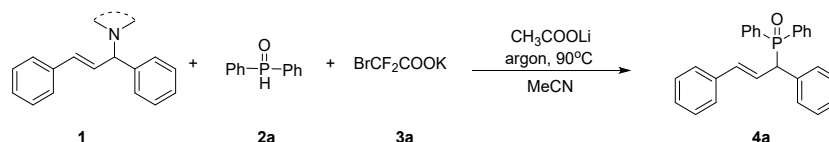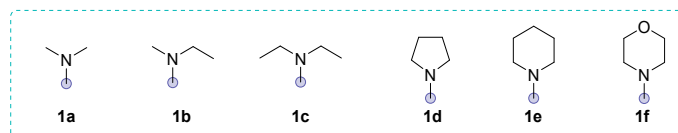

| Entries | <b>1</b>  | Yield (%) <sup>a</sup> |
|---------|-----------|------------------------|
| 1       | <b>1a</b> | 61                     |
| 2       | <b>1b</b> | 59                     |
| 3       | <b>1c</b> | 47                     |
| 4       | <b>1d</b> | 29                     |
| 5       | <b>1e</b> | 31                     |
| 6       | <b>1f</b> | 38                     |

Reaction condition: **1** (1.0 equiv., 0.2 mmol), **2a** (1.5 equiv., 0.3 mmol), BrCF<sub>2</sub>COOK (3.0 eq, 0.6 mmol) CH<sub>3</sub>COOLi (3 equiv., 0.6 mmol), CH<sub>3</sub>CN (2 mL) at 90 °C for 12 h under argon; <sup>a</sup> isolated yields.

Supplementary Table 3. The effects of solvent

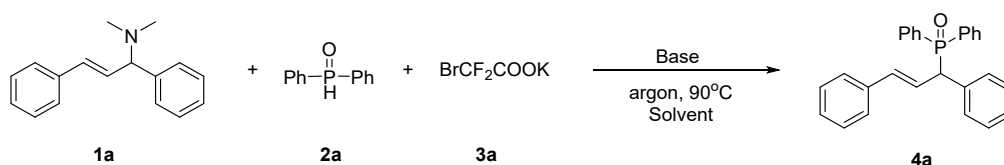

| Entries | solvent                           | Yield (%) <sup>a</sup> |
|---------|-----------------------------------|------------------------|
| 1       | CH <sub>3</sub> CN                | 61                     |
| 2       | Toluene                           | NR                     |
| 3       | DME                               | Trace                  |
| 4       | 1,4-dioxane                       | Trace                  |
| 5       | DMF                               | ND                     |
| 6       | DMSO                              | ND                     |
| 7       | CH <sub>3</sub> CN/ Toluene (1:1) | 43%                    |

Reaction condition: 1a (1.0 equiv., 0.2 mmol), 2a (1.5 equiv., 0.3 mmol), BrCF<sub>2</sub>COOK (3.0 eq, 0.6 mmol) CH<sub>3</sub>COOLi (3 equiv.0.6mmol), solvent (2 mL) at 90 °C for 12 h under argon; <sup>a</sup> isolated yields.

Supplementary Table 4. The effects of halodifluorinated reagents

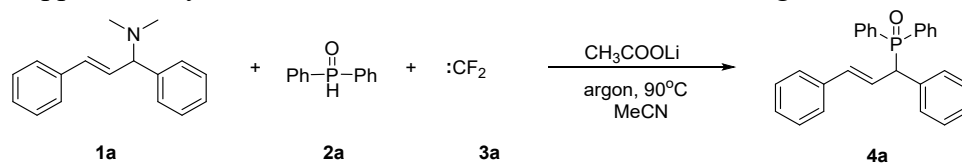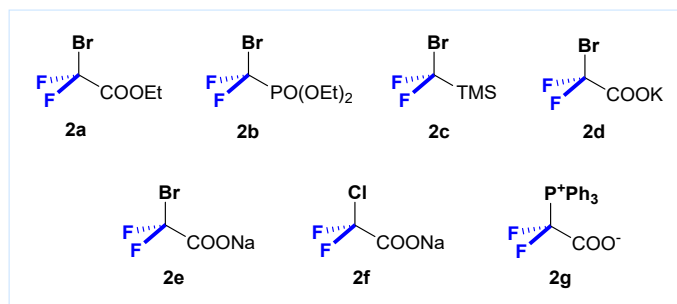

| Entries | Base      | Yield (%) <sup>a</sup> |
|---------|-----------|------------------------|
| 1       | <b>2a</b> | 32                     |
| 2       | <b>2b</b> | 47                     |
| 3       | <b>2c</b> | ND                     |
| 4       | <b>2d</b> | 61                     |
| 5       | <b>2e</b> | 45                     |
| 6       | <b>2f</b> | 53                     |
| 7       | <b>2g</b> | ND                     |

Reaction condition: 1a (1.0 equiv., 0.2 mmol), 2a (1.5 equiv., 0.3 mmol), halodifluorinated reagents (3.0 eq, 0.6 mmol) CH<sub>3</sub>COOLi (3 equiv.0.6mmol), MeCN (2 mL) at 90 °C for 12 h under argon; <sup>a</sup> isolated yields. ND = not detected.

Supplementary Table 5. The effects of temperature, equivalent of BrCF<sub>2</sub>COOK and CH<sub>3</sub>COOLi.

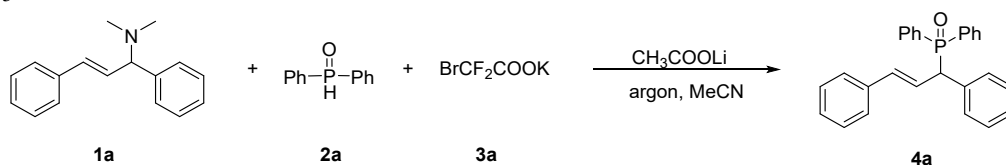

| Entries | CH <sub>3</sub> COOLi | T °C | BrCF <sub>2</sub> COOK | Yield (%) <sup>a</sup> |
|---------|-----------------------|------|------------------------|------------------------|
| 1       | 3eq                   | 80   | 3eq                    | 55                     |
| 2       | 3eq                   | 90   | 3eq                    | 61                     |
| 3       | 3eq                   | 100  | 3eq                    | 86                     |
| 4       | 3eq                   | 110  | 3eq                    | 71                     |
| 5       | 2eq                   | 100  | 3eq                    | 77                     |
| 6       | 1eq                   | 100  | 3eq                    | 64                     |
| 7       | 0eq                   | 100  | 3eq                    | 46                     |
| 8       | 3eq                   | 100  | 2eq                    | 75                     |
| 9       | 3eq                   | 100  | 1eq                    | 57                     |

Reaction condition: **1a** (1.0 equiv., 0.2 mmol), **2a** (1.5 equiv., 0.3 mmol), BrCF<sub>2</sub>COOK (1-3 equiv.) CH<sub>3</sub>COOLi (0-3 equiv.), CH<sub>3</sub>CN (2 mL) at 80 ~ 110 °C for 12 h under argon; <sup>a</sup> isolated yields.

### Experiments with leaving group monitoring

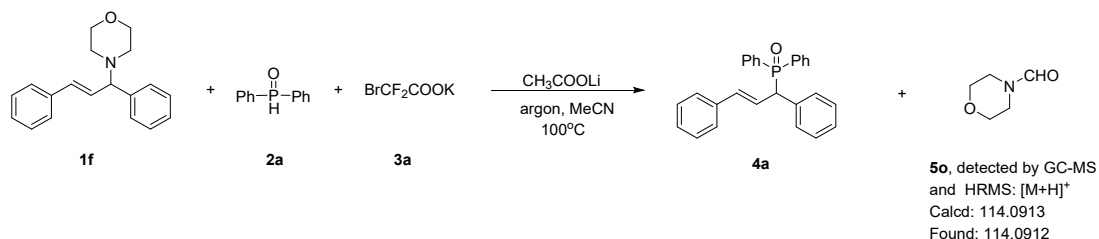

In air, **1f** (0.2 mmol), BrCF<sub>2</sub>COOK (3.0 eq, 0.6 mmol) CH<sub>3</sub>COOLi (3.0 eq, 0.6 mmol) and **2a** (1.5 eq, 0.3 mmol) were added to a Schlenk tube equipped with a stir bar. The vessel was evacuated and filled with argon (three cycles). CH<sub>3</sub>CN (2 mL) was added by syringe under argon atmosphere. The resulting reaction mixture was stirred vigorously at 100 °C for 12 h. Upon completion of the reaction, the solvent was evaporated under reduced pressure and the residue was purified by flash column chromatography (silica gel, petroleum ether: ethyl acetate = 1:1, v/v) to give the desired products.

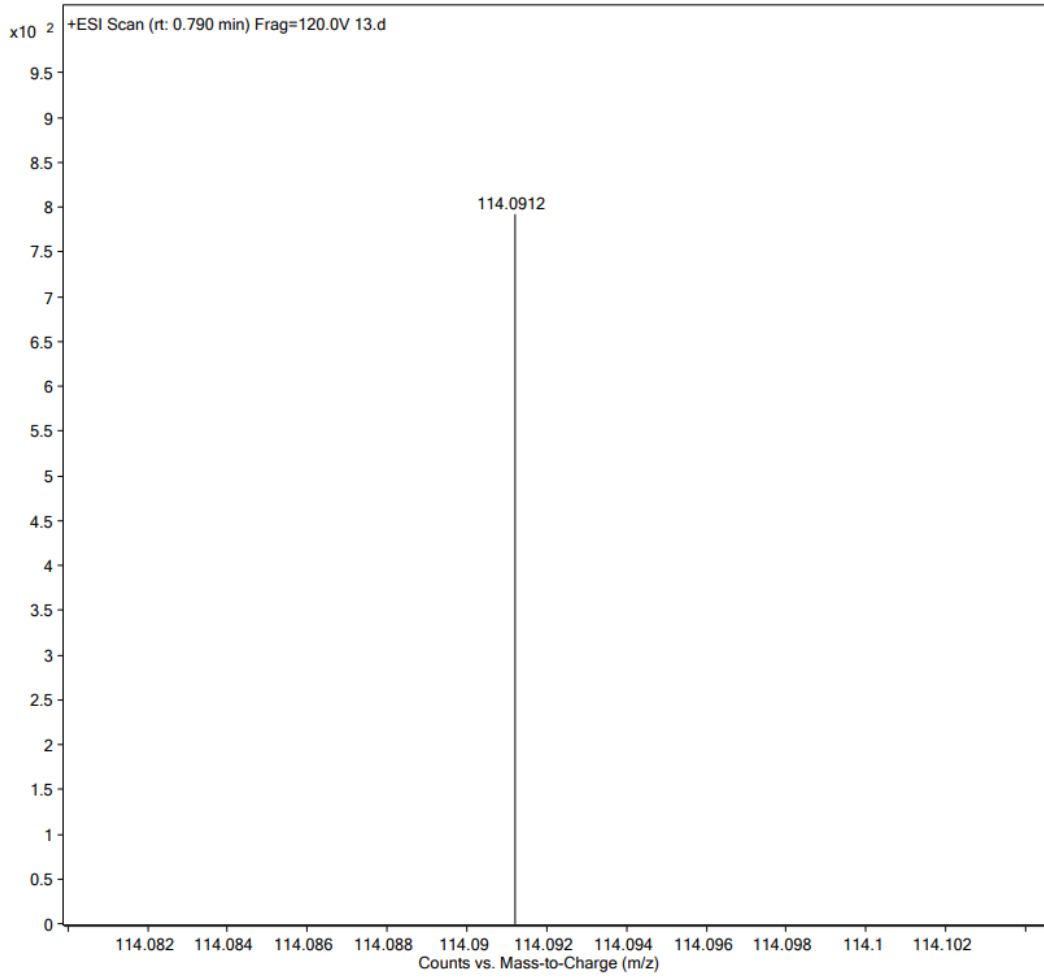

## 2.2 Crystal data

Crystallographic data for compound **4m** (CCDC-2305694) has been deposited with the Cambridge Crystallographic Data Centre, Copies of the data can be obtained, free of charge, on application to CCDC (Email: deposit@ccdc.cam.ac.uk).

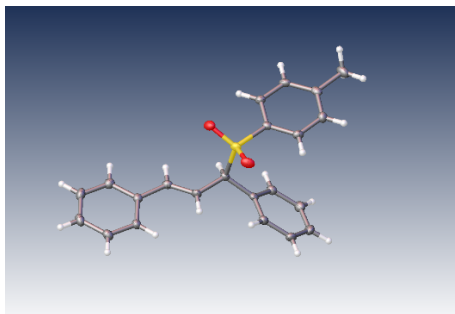

```
Bond precision:  C-C = 0.0019 A           Wavelength=1.54178
Cell:            a=18.1661 (7)           b=5.6830 (2)           c=17.2863 (7)
                 alpha=90                beta=97.593 (1)        gamma=90
Temperature:    100 K

Volume          Calculated                Reported
Space group     P 21/c                      P 1 21/c 1
Hall group      -P 2ybc                       -P 2ybc
Moiety formula  C22 H20 O2 S                            C22 H20 O2 S
Sum formula     C22 H20 O2 S                            C22 H20 O2 S
Mr              348.44                      348.44
Dx,g cm-3      1.308                          1.308
Z               4                          4
Mu (mm-1)      1.712                          1.711
F000           736.0                          736.0
F000'          739.25
h,k,lmax       21, 6, 20                          21, 6, 20
Nref           3221                          3191
Tmin,Tmax      0.512, 0.531                       0.562, 0.753
Tmin'          0.464

Correction method= # Reported T Limits: Tmin=0.562 Tmax=0.753
AbsCorr = MULTI-SCAN

Data completeness= 0.991           Theta(max)= 68.191

R(reflections)= 0.0357( 3132)           wR2(reflections)=
S = 1.078                               0.0900( 3191)
Npar= 227
```

## 2.3 Characterization data for products

### (E)-N,N-dimethyl-1,3-diphenylprop-2-en-1-amine(1a)

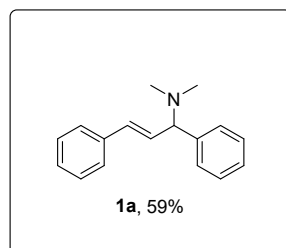

Following the **general procedure 1** on 20 mmol scale, yellow oil, yield: 59% (2.8g),  $R_f = 0.3$  (silica gel, PE: EA = 5:1, v/v), column chromatography (silica gel, PE: EA = 20:1, v/v).

$^1\text{H NMR}$  (500 MHz, Chloroform-d)  $\delta$  7.48 – 7.44 (m, 2H), 7.44 – 7.36 (m, 4H), 7.36 – 7.29 (m, 3H), 7.29 – 7.22 (m, 1H), 6.62 (d,  $J = 15.8$  Hz, 1H), 6.44 (dd,  $J = 15.8, 8.8$  Hz, 1H), 3.76 (d,  $J = 8.7$  Hz, 1H), 2.31 (s, 6H).

### (E)-1,3-bis(4-fluorophenyl)-N,N-dimethylprop-2-en-1-amine(1b)

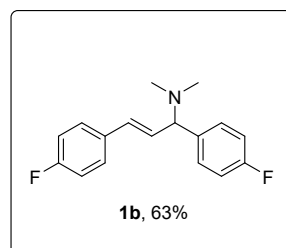

Following the **general procedure 1** on 10 mmol scale, yellow oil, yield: 63% (1.7 g),  $R_f = 0.3$  (silica gel, PE: EA = 5:1, v/v), column chromatography (silica gel, PE: EA = 20:1, v/v).

$^1\text{H NMR}$  (500 MHz, Chloroform-d)  $\delta$  7.34 (ddd,  $J = 18.1, 8.7, 5.5$  Hz, 4H), 7.01 (dt,  $J = 24.0, 8.7$  Hz, 4H), 6.51 (d,  $J = 15.8$  Hz, 1H), 6.24 (dd,  $J = 15.8, 8.7$  Hz, 1H), 3.69 (d,  $J = 8.7$  Hz, 1H), 2.26 (s, 6H).

### (E)-1,3-bis(4-chlorophenyl)-N,N-dimethylprop-2-en-1-amine(1c)

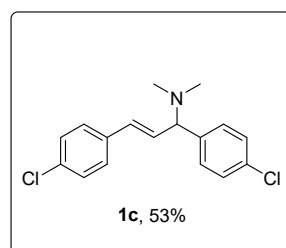

Following the **general procedure 1** on 10 mmol scale, yellow oil, yield: 53% (1.6 g),  $R_f = 0.3$  (silica gel, PE: EA = 5:1, v/v), column chromatography (silica gel, PE: EA = 20:1, v/v).

$^1\text{H NMR}$  (500 MHz, Chloroform-d)  $\delta$  7.39 – 7.32 (m, 4H), 7.32 – 7.25 (m, 4H), 6.54 (d,  $J = 15.8$  Hz, 1H), 6.31 (dd,  $J = 15.8, 8.7$  Hz, 1H), 3.72 (d,  $J = 8.7$  Hz, 1H), 2.26 (s, 6H).

### (E)-1,3-bis(4-bromophenyl)-N,N-dimethylprop-2-en-1-amine(1d)

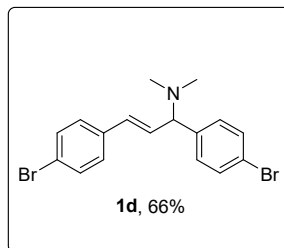

Following the **general procedure 1** on 10 mmol scale, yellow oil, yield: 66% (2.6 g),  $R_f = 0.3$  (silica gel, PE: EA = 5:1, v/v), column chromatography (silica gel, PE: EA = 20:1, v/v).

**$^1\text{H NMR}$**  (500 MHz, Chloroform- $d$ )  $\delta$  7.52 – 7.45 (m, 2H), 7.45 – 7.38 (m, 2H), 7.34 – 7.26 (m, 2H), 7.26 – 7.18 (m, 2H), 6.52 (d,  $J = 15.8$  Hz, 1H), 6.31 (dd,  $J = 15.8, 8.7$  Hz, 1H), 3.70 (d,  $J = 8.7$  Hz, 1H), 2.25 (s, 6H).

### **(E)-1,3-bis(4-iodophenyl)-N,N-dimethylprop-2-en-1-amine(1e)**

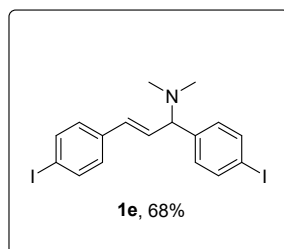

Following the **general procedure 1** on 10 mmol scale, yellow oil, yield: 68% (3.3 g),  $R_f = 0.3$  (silica gel, PE: EA = 5:1, v/v), column chromatography (silica gel, PE: EA = 20:1, v/v).

**$^1\text{H NMR}$**  (500 MHz, Chloroform- $d$ )  $\delta$  7.69 (d,  $J = 8.3$  Hz, 2H), 7.62 (d,  $J = 8.5$  Hz, 2H), 7.17 (d,  $J = 8.4$  Hz, 2H), 7.10 (d,  $J = 8.5$  Hz, 2H), 6.49 (d,  $J = 15.8$  Hz, 1H), 6.31 (dd,  $J = 15.8, 8.7$  Hz, 1H), 3.67 (d,  $J = 8.7$  Hz, 1H), 2.24 (s, 6H).

### **(E)-3-(4-ethylphenyl)-N,N-dimethyl-1-phenylprop-2-en-1-amine(1f)**

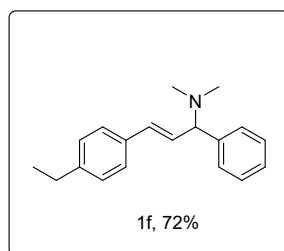

Following the **general procedure 1** on 10 mmol scale, yellow oil, yield: 72% (1.9 g),  $R_f = 0.3$  (silica gel, PE: EA = 5:1, v/v), column chromatography (silica gel, PE: EA = 20:1, v/v).

**$^1\text{H NMR}$**  (500 MHz, Chloroform- $d$ )  $\delta$  7.48 – 7.44 (m, 1H), 7.44 – 7.39 (m, 1H), 7.39 – 7.31 (m, 4H), 7.31 – 7.26 (m, 1H), 7.24 (dd,  $J = 7.8, 3.1$  Hz, 1H), 7.20 – 7.17 (m, 1H), 6.61 (dd,  $J = 15.8, 4.4$  Hz, 1H), 6.42 (ddd,  $J = 25.6, 15.8, 8.7$  Hz, 1H), 3.75 (dd,  $J = 8.8, 6.5$  Hz, 1H), 2.68 (dq,  $J = 12.6, 7.6$  Hz, 2H), 2.31 (d,  $J = 0.8$  Hz, 6H), 1.28 (dt,  $J = 11.3, 7.6$  Hz, 3H).

### **(E)-3-(4-fluorophenyl)-N,N-dimethyl-1-(p-tolyl)prop-2-en-1-amine(1g)**

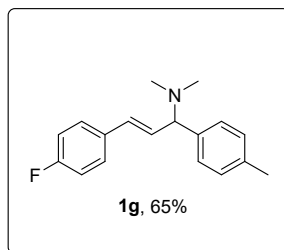

Following the **general procedure 1** on 10 mmol scale, yellow oil, yield: 65% (1.7 g),  $R_f = 0.3$  (silica gel, PE: EA = 5:1, v/v), column chromatography (silica gel, PE: EA = 20:1, v/v).

**$^1\text{H NMR}$**  (500 MHz, Chloroform- $d$ )  $\delta$  7.45 – 7.37 (m, 2H), 7.36 – 7.30 (m, 2H), 7.17 (d,  $J = 7.9$  Hz, 2H), 7.11 – 6.99 (m, 2H), 6.58 (d,  $J = 15.7$  Hz, 1H), 6.33 (dd,  $J = 15.7, 8.8$  Hz, 1H), 3.75 (d,  $J = 8.8$  Hz, 1H), 2.39 (d,  $J = 8.3$  Hz, 3H), 2.30 (d,  $J = 5.6$  Hz, 6H).

**(2E,4E)-N,N-dimethyl-1,5-diphenylpenta-2,4-dien-1-amine(1h)**

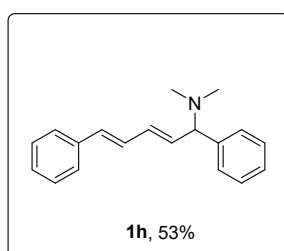

Following the **general procedure 1** on 10 mmol scale, yellow oil, yield: 53% (1.4 g),  $R_f = 0.3$  (silica gel, PE: EA = 5:1, v/v), column chromatography (silica gel, PE: EA = 20:1, v/v).

**$^1\text{H NMR}$**  (500 MHz, Chloroform- $d$ )  $\delta$  7.42 – 7.34 (m, 6H), 7.35 – 7.30 (m, 2H), 7.30 – 7.26 (m, 1H), 7.26 – 7.21 (m, 1H), 6.79 (ddd,  $J = 15.7, 10.5, 0.8$  Hz, 1H), 6.54 (d,  $J = 15.7$  Hz, 1H), 6.40 (dd,  $J = 15.1, 10.5$  Hz, 1H), 6.01 (dd,  $J = 15.1, 8.9$  Hz, 1H), 3.66 (d,  $J = 8.8$  Hz, 1H), 2.27 (s, 6H).

**N,N-dimethyl-4-phenylbut-3-yn-2-amine (1g)**

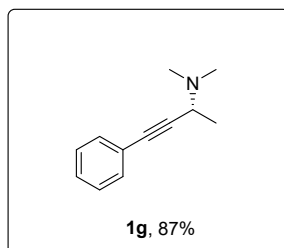

Following the **general procedure 7** on 0.2 mmol scale, yellow oil, yield: 87% (1.5 g),  $R_f = 0.3$  (silica gel, PE: EA = 5:1, v/v), column chromatography (silica gel, PE: EA = 10:1, v/v).

**HPLC analysis:** The enantiomeric purity was determined by HPLC analysis (Daicel Chiralcel OD-H, hexane/2-propanol = 90:10, 0.5 mL/min,  $\lambda = 254$  nm,  $\tau_R$  (major) = 7.4 min and  $\tau_R$  (minor) = 7.9 min).

**$^1\text{H NMR}$**  (500 MHz, Chloroform- $d$ )  $\delta$  7.45 – 7.41 (m, 2H), 7.29 (dt,  $J = 4.6, 2.8$  Hz, 3H), 3.70 (q,  $J = 7.0$  Hz, 1H), 2.33 (s, 6H), 1.41 (d,  $J = 7.1$  Hz, 3H).

**sodium 4-isopropylbenzenesulfinate(5a)**



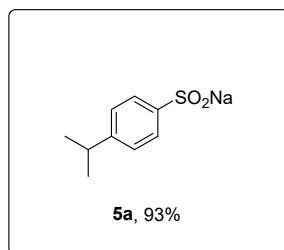

Following the **general procedure 3** on 10 mmol scale, white solid, yield: 93% (1.9 g).

**<sup>1</sup>H NMR** (500 MHz, DMSO-d<sub>6</sub>) δ 7.46 (d, J = 8.1 Hz, 2H), 7.20 (d, J = 8.1 Hz, 2H), 2.88 (hept, J = 6.9 Hz, 1H), 1.19 (d, J = 6.9 Hz, 6H).

### sodium cyclopropanesulfinate(**5b**)

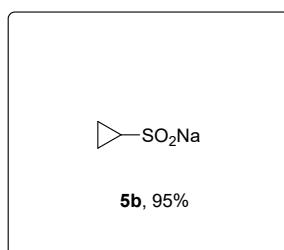

Following the **general procedure 3** on 10 mmol scale, white solid, yield: 95% (1.2 g).

**<sup>1</sup>H NMR** (500 MHz, DMSO-d<sub>6</sub>) δ 1.58 (tt, J = 8.1, 5.0 Hz, 1H), 0.48 (dt, J = 5.6, 2.8 Hz, 2H), 0.37 – 0.19 (m, 2H).

### sodium naphthalene-2-sulfinate(**5c**)

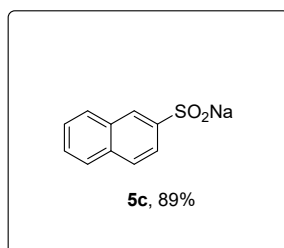

Following the **general procedure 3** on 10 mmol scale, white solid, yield: 89% (1.9 g).

**<sup>1</sup>H NMR** (500 MHz, DMSO-d<sub>6</sub>) δ 7.99 – 7.82 (m, 4H), 7.70 (d, J = 1.5 Hz, 1H), 7.56 – 7.42 (m, 2H).

### sodium thiophene-2-sulfinate(**5d**)

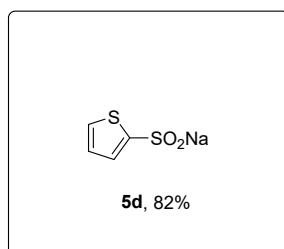

Following the **general procedure 3** on 10 mmol scale, white solid, yield: 82% (1.4 g).

**<sup>1</sup>H NMR** (500 MHz, DMSO-d<sub>6</sub>) δ 7.39 (dd, J = 4.7, 1.5 Hz, 1H), 7.03 – 6.81 (m, 2H).



### (E)-(1,3-diphenylallyl)diphenylphosphine oxide (4a)

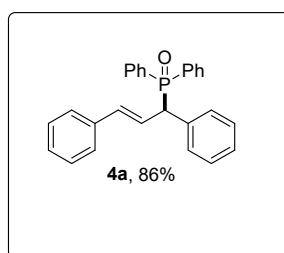

Following the **general procedure 4** on 0.2 mmol scale, White solid (mp: 203-205 °C), yield: 86% (67.8 mg),  $R_f = 0.4$  (silica gel, PE: EA = 1:1, v/v), column chromatography (silica gel, PE: EA = 3:1, v/v).

**$^1\text{H NMR}$**  (500 MHz, Chloroform-d)  $\delta$  7.92 – 7.83 (m, 2H), 7.67 – 7.56 (m, 2H), 7.48 (ddd,  $J = 14.3, 7.3, 2.2$  Hz, 3H), 7.42 – 7.34 (m, 3H), 7.30 (td,  $J = 7.6, 3.1$  Hz, 2H), 7.25 – 7.20 (m, 6H), 7.20 – 7.13 (m, 2H), 6.61 (ddd,  $J = 16.0, 9.2, 7.1$  Hz, 1H), 6.34 (dd,  $J = 15.7, 3.9$  Hz, 1H), 4.40 (t,  $J = 9.4$  Hz, 1H).

**$^{13}\text{C NMR}$**  (126 MHz, Chloroform-d)  $\delta$  136.7 (d,  $J = 2.4$  Hz), 135.9 (d,  $J = 5.9$  Hz), 134.4 (d,  $J = 11.4$  Hz), 132.0 (d,  $J = 37.4$  Hz), 131.8 (d,  $J = 2.8$  Hz), 131.7 (d,  $J = 8.4$  Hz), 131.6 (d,  $J = 2.9$  Hz), 131.3 (d,  $J = 8.7$  Hz), 131.1, 129.5 (d,  $J = 5.8$  Hz), 128.6 (d,  $J = 1.7$  Hz), 128.5, 128.4 (d,  $J = 1.7$  Hz), 128.2 (d,  $J = 11.4$  Hz), 127.6, 127.2 (d,  $J = 2.7$  Hz), 126.4 (d,  $J = 1.4$  Hz), 124.6 (d,  $J = 7.2$  Hz), 52.4 (d,  $J = 65.0$  Hz).

**$^{31}\text{P NMR}$**  (202 MHz,  $\text{CDCl}_3$ )  $\delta$  31.52.

**HRMS (ESI) m/z:**  $[\text{M}+\text{H}]^+$  Calcd. for  $\text{C}_{27}\text{H}_{24}\text{OP}^+$  395.1559.; Found: 395.1562

### (E)-(1,3-diphenylallyl)di-p-tolylphosphine oxide (4b)

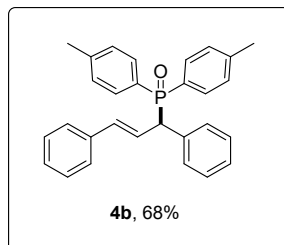

Following the **general procedure 4** on 0.2 mmol scale, White solid (mp: 210-211 °C), yield: 68% (57.4 mg),  $R_f = 0.4$  (silica gel, PE: EA = 1:1, v/v), column chromatography (silica gel, PE: EA = 3:1, v/v).

**$^1\text{H NMR}$**  (500 MHz, Chloroform-d)  $\delta$  7.76 – 7.66 (m, 2H), 7.44 (dd,  $J = 10.9, 8.1$  Hz, 2H), 7.37 – 7.31 (m, 2H), 7.29 – 7.20 (m, 8H), 7.20 – 7.14 (m, 2H), 7.10 (dd,  $J = 8.0, 2.8$  Hz, 2H), 6.59 (ddd,  $J = 16.0, 9.1, 7.1$  Hz, 1H), 6.33 (ddd,  $J = 15.8, 3.8, 0.9$  Hz, 1H), 4.34 (t,  $J = 9.6$  Hz, 1H), 2.38 (s, 3H), 2.30 (s, 3H).

**$^{13}\text{C NMR}$**  (126 MHz, Chloroform-d)  $\delta$  136.9 (d,  $J = 2.5$  Hz), 136.2 (d,  $J = 5.9$  Hz), 134.2 (d,  $J = 11.3$  Hz), 131.7 (d,  $J = 8.7$  Hz), 131.4 (d,  $J = 9.1$  Hz), 129.5 (d,  $J = 5.8$  Hz), 129.2 (d,  $J = 11.8$  Hz), 128.9 (d,  $J = 12.1$  Hz), 128.7, 128.5 (d,  $J = 1.8$  Hz), 128.4, 128.3, 128.0, 127.5, 127.0 (d,  $J = 2.3$  Hz), 126.4 (d,  $J = 1.5$  Hz), 125.0 (d,  $J = 7.1$  Hz), 52.5 (d,  $J = 65.3$  Hz), 21.6 (d,  $J = 8.6$  Hz).

**$^{31}\text{P NMR}$**  (202 MHz, Chloroform-d)  $\delta$  31.85.

**HRMS (ESI) m/z:**  $[\text{M}+\text{Na}]^+$  Calcd. for  $\text{C}_{29}\text{H}_{28}\text{OP}^+$  445.1692.; Found: 445.1686.

### (E)-bis(3,5-dimethylphenyl)(1,3-diphenylallyl)phosphine oxide (**4c**)

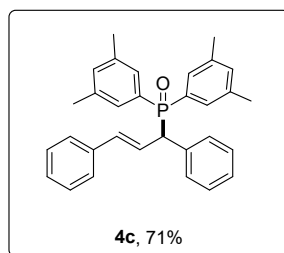

Following the **general procedure 4** on 0.2 mmol scale, White solid (mp: 210-212 °C), yield: 71% (63.9 mg),  $R_f = 0.4$  (silica gel, PE: EA = 1:1, v/v), column chromatography (silica gel, PE: EA = 3:1, v/v).

**<sup>1</sup>H NMR** (500 MHz, Chloroform-d)  $\delta$  7.47 (dt,  $J = 11.2, 2.2$  Hz, 2H), 7.44 – 7.35 (m, 2H), 7.30 – 7.23 (m, 6H), 7.20 (dp,  $J = 6.0, 4.1, 2.9$  Hz, 4H), 7.14 (s, 1H), 7.03 (s, 1H), 6.61 (dddd,  $J = 13.1, 8.8, 6.9, 2.0$  Hz, 1H), 6.34 (dt,  $J = 15.8, 3.4$  Hz, 1H), 4.38 (td,  $J = 9.6, 4.5$  Hz, 1H), 2.34 (s, 6H), 2.22 (s, 6H).

**<sup>13</sup>C NMR** (126 MHz, Chloroform-d)  $\delta$  138.0 (d,  $J = 12.2$  Hz), 137.7 (d,  $J = 12.1$  Hz), 136.9 (d,  $J = 2.6$  Hz), 136.3 (d,  $J = 5.9$  Hz), 134.3 (d,  $J = 11.2$  Hz), 133.5 (d,  $J = 2.8$  Hz), 133.2 (d,  $J = 3.0$  Hz), 131.7 (d,  $J = 32.6$  Hz), 131.0 (d,  $J = 32.7$  Hz), 129.6 (d,  $J = 5.7$  Hz), 129.4 (d,  $J = 8.4$  Hz), 129.0 (d,  $J = 8.7$  Hz), 128.5 (d,  $J = 1.9$  Hz), 128.4, 127.5, 127.0 (d,  $J = 2.3$  Hz), 126.4 (d,  $J = 1.4$  Hz), 125.0 (d,  $J = 7.2$  Hz), 52.3 (d,  $J = 64.4$  Hz), 21.3 (d,  $J = 14.6$  Hz).

**<sup>31</sup>P NMR** (202 MHz, Chloroform-d)  $\delta$  32.23.

**HRMS (ESI) m/z:**  $[M+H]^+$  Calcd. for  $C_{31}H_{32}OP^+$  451.2185.; Found: 451.2182.

### (E)-(1,3-diphenylallyl)bis(3-methoxyphenyl)phosphine oxide (**4d**)

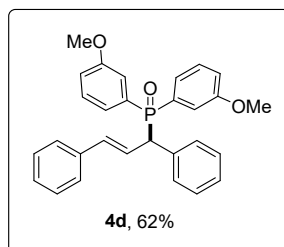

Following the **general procedure 4** on 0.2 mmol scale, White solid (mp: 164-165 °C), yield: 62% (56.3 mg),  $R_f = 0.3$  (silica gel, PE: EA = 1:1, v/v), column chromatography (silica gel, PE: EA = 3:1, v/v).

**<sup>1</sup>H NMR** (500 MHz, Chloroform-d)  $\delta$  7.85 – 7.73 (m, 1H), 7.50 – 7.42 (m, 1H), 7.41 – 7.33 (m, 3H), 7.31 – 7.22 (m, 6H), 7.18 (ddd,  $J = 15.0, 7.7, 3.7$  Hz, 5H), 7.04 (ddd,  $J = 11.8, 8.3, 5.2$  Hz, 2H), 6.78 (dt,  $J = 15.8, 8.9$  Hz, 1H), 6.50 (dd,  $J = 15.9, 3.1$  Hz, 1H), 4.53 (t,  $J = 8.6$  Hz, 1H), 2.37 (s, 3H), 2.19 (s, 3H).

**<sup>13</sup>C NMR** (126 MHz, Chloroform-d)  $\delta$  143.1 (d,  $J = 7.2$  Hz), 142.6 (d,  $J = 7.6$  Hz), 137.0 (d,  $J = 5.5$  Hz), 136.9, 134.22 (d,  $J = 11.5$  Hz), 132.1 (d,  $J = 10.3$  Hz), 131.9, 131.8, 131.7 – 131.5 (m), 131.3 (d,  $J = 2.5$  Hz), 130.8 (d,  $J = 48.4$  Hz), 129.6 (d,  $J = 5.5$  Hz), 128.5, 127.6, 127.0 (d,  $J = 2.0$  Hz), 126.4, 125.7 (d,  $J = 6.4$  Hz), 125.2 (dd,  $J = 26.3, 11.9$  Hz), 50.7 (d,  $J = 66.0$  Hz), 21.2 (dd,  $J = 38.1, 3.7$  Hz).

**<sup>31</sup>P NMR** (202 MHz, Chloroform-d)  $\delta$  35.16.

**HRMS (ESI) m/z:**  $[M+H]^+$  Calcd. for  $C_{29}H_{28}O_3P^+$  455.1771.; Found: 455.1769.

### (E)-(1,3-diphenylallyl)bis(4-fluorophenyl)phosphine oxide (4e)

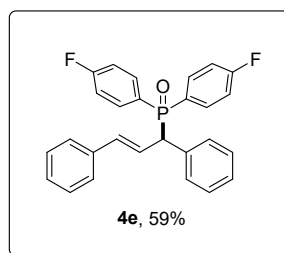

Following the **general procedure 4** on 0.2 mmol scale, White solid (mp: 195-197 °C), yield: 59% (50.8 mg),  $R_f = 0.3$  (silica gel, PE: EA = 1:1, v/v), column chromatography (silica gel, PE: EA = 3:1, v/v).

**$^1\text{H NMR}$**  (500 MHz, Chloroform- $d$ )  $\delta$  7.91 – 7.77 (m, 2H), 7.64 – 7.49 (m, 2H), 7.34 (dt,  $J = 8.0, 1.7$  Hz, 2H), 7.31 – 7.15 (m, 10H), 7.03 (tt,  $J = 8.7, 2.2$  Hz, 2H), 6.59 (ddd,  $J = 16.2, 9.2, 7.2$  Hz, 1H), 6.36 (dd,  $J = 15.8, 3.9$  Hz, 1H), 4.32 (t,  $J = 9.4$  Hz, 1H).

**$^{13}\text{C NMR}$**  (126 MHz, Chloroform- $d$ )  $\delta$  166.0 (d,  $J = 3.4$  Hz), 165.8 (d,  $J = 3.4$  Hz), 164.0 (d,  $J = 3.3$  Hz), 163.8 (d,  $J = 3.2$  Hz), 135.5 (d,  $J = 6.0$  Hz), 134.7 (d,  $J = 11.6$  Hz), 134.1 (t,  $J = 9.3$  Hz), 133.9 – 133.6 (m), 129.4 (d,  $J = 5.7$  Hz), 128.7 (d,  $J = 1.8$  Hz), 128.5, 127.9, 127.6 (d,  $J = 3.4$  Hz), 127.4 (d,  $J = 2.3$  Hz), 127.1, 126.8 (d,  $J = 3.3$  Hz), 126.4, 124.0 (d,  $J = 7.3$  Hz), 115.9 (ddd,  $J = 37.0, 21.3, 12.6$  Hz), 52.6 (d,  $J = 66.3$  Hz).

**$^{31}\text{P NMR}$**  (202 MHz, Chloroform- $d$ )  $\delta$  30.42.

**$^{19}\text{F NMR}$**  (471 MHz, Chloroform- $d$ )  $\delta$  -106.48, -106.72.

**HRMS (ESI)  $m/z$** :  $[\text{M}+\text{H}]^+$  Calcd. for  $\text{C}_{27}\text{H}_{22}\text{F}_2\text{OP}^+$  431.1371.; Found: 431.1374.

### (E)-bis(3-chlorophenyl)(1,3-diphenylallyl)phosphine oxide (4f)

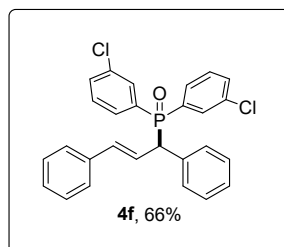

Following the **general procedure 4** on 0.2 mmol scale, White solid (mp: 233-235 °C), yield: 66% (61.0 mg),  $R_f = 0.3$  (silica gel, PE: EA = 1:1, v/v), column chromatography (silica gel, PE: EA = 3:1, v/v).

**$^1\text{H NMR}$**  (500 MHz, Chloroform- $d$ )  $\delta$  7.76 (dd,  $J = 10.4, 8.1$  Hz, 2H), 7.51 – 7.42 (m, 4H), 7.36 – 7.27 (m, 4H), 7.26 – 7.13 (m, 8H), 6.56 (ddd,  $J = 16.2, 9.2, 7.3$  Hz, 1H), 6.37 (dd,  $J = 15.7, 3.8$  Hz, 1H), 4.33 (t,  $J = 9.3$  Hz, 1H).

**$^{13}\text{C NMR}$**  (126 MHz, Chloroform- $d$ )  $\delta$  138.7 (d,  $J = 3.4$  Hz), 138.4 (d,  $J = 3.4$  Hz), 136.4 (d,  $J = 2.6$  Hz), 135.3 (d,  $J = 6.1$  Hz), 134.9 (d,  $J = 11.5$  Hz), 133.4 (d,  $J = 10.5$  Hz), 133.0 (d,  $J = 9.2$  Hz), 132.6 (d,  $J = 9.5$  Hz), 129.6 (d,  $J = 3.6$  Hz), 129.4 (d,  $J = 5.9$  Hz), 129.0 (d,  $J = 12.0$  Hz), 128.8 (d,  $J = 1.8$  Hz), 128.7 (d,  $J = 12.2$  Hz), 128.6, 127.91, 127.5 (d,  $J = 2.4$  Hz), 126.4 (d,  $J = 1.5$  Hz), 123.8 (d,  $J = 7.3$  Hz), 52.3 (d,  $J = 66.2$  Hz).

**$^{31}\text{P NMR}$**  (202 MHz, Chloroform- $d$ )  $\delta$  30.41.

**HRMS (ESI)  $m/z$** :  $[\text{M}+\text{H}]^+$  Calcd. for  $\text{C}_{27}\text{H}_{22}\text{Cl}_2\text{OP}^+$  463.0780.; Found: 463.0783.

### (E)-bis(2-bromophenyl)(1,3-diphenylallyl)phosphine oxide (4g)

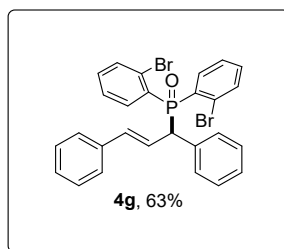

Following the **general procedure 4** on 0.2 mmol scale, White solid (mp: 241-243 °C), yield: 63% (69.3 mg),  $R_f = 0.3$  (silica gel, PE: EA = 1:1, v/v), column chromatography (silica gel, PE: EA = 3:1, v/v).

**<sup>1</sup>H NMR** (500 MHz, Chloroform-d)  $\delta$  8.29 (ddd,  $J = 11.6, 7.7, 1.7$  Hz, 1H), 7.91 – 7.81 (m, 1H), 7.60 – 7.49 (m, 3H), 7.46 – 7.37 (m, 2H), 7.34 – 7.28 (m, 3H), 7.28 – 7.22 (m, 2H), 7.22 – 7.09 (m, 6H), 6.82 (dt,  $J = 16.0, 9.2$  Hz, 1H), 6.67 (dd,  $J = 15.9, 3.0$  Hz, 1H), 5.17 (t,  $J = 8.6$  Hz, 1H).

**<sup>13</sup>C NMR** (126 MHz, Chloroform-d)  $\delta$  137.0 (d,  $J = 7.0$  Hz), 136.8 (d,  $J = 5.7$  Hz), 136.7, 136.3 (d,  $J = 8.2$  Hz), 134.7 – 134.3 (m), 133.6 (d,  $J = 7.8$  Hz), 133.1 (dd,  $J = 30.9, 2.2$  Hz), 132.1 (d,  $J = 43.7$  Hz), 129.2 (d,  $J = 6.1$  Hz), 128.7, 128.5, 127.8, 127.3 (d,  $J = 2.1$  Hz), 126.8 (d,  $J = 10.6$  Hz), 126.6, 126.5, 125.2 (d,  $J = 4.1$  Hz), 123.8 (d,  $J = 5.6$  Hz), 48.0 (d,  $J = 71.0$  Hz).

**<sup>31</sup>P NMR** (202 MHz, Chloroform-d)  $\delta$  31.21.

**HRMS (ESI) m/z:**  $[M+H]^+$  Calcd. for  $C_{27}H_{22}Br_2OP^+$  550.9770.; Found: 550.9774.

### (E)-(1,3-diphenylallyl)di(naphthalen-2-yl)phosphine oxide (4h)

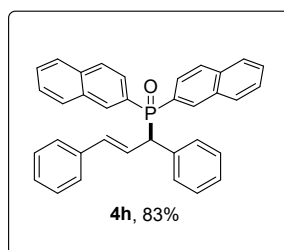

Following the **general procedure 4** on 0.2 mmol scale, White solid (mp: 213-214 °C), yield: 83% (82.0 mg),  $R_f = 0.3$  (silica gel, PE: EA = 1:1, v/v), column chromatography (silica gel, PE: EA = 3:1, v/v).

**<sup>1</sup>H NMR** (500 MHz, Chloroform-d)  $\delta$  8.52 (dd,  $J = 12.8, 1.4$  Hz, 1H), 8.21 (dd,  $J = 13.2, 1.5$  Hz, 1H), 7.97 – 7.83 (m, 4H), 7.82 – 7.74 (m, 3H), 7.63 (td,  $J = 8.7, 1.6$  Hz, 1H), 7.58 (ddd,  $J = 8.3, 6.8, 1.4$  Hz, 1H), 7.53 (td,  $J = 8.0, 1.4$  Hz, 2H), 7.48 (ddd,  $J = 8.1, 6.8, 1.3$  Hz, 1H), 7.43 (dt,  $J = 8.0, 1.6$  Hz, 2H), 7.25 – 7.12 (m, 8H), 6.68 (ddd,  $J = 16.0, 9.1, 7.2$  Hz, 1H), 6.41 (dd,  $J = 15.8, 3.8$  Hz, 1H), 4.61 (t,  $J = 9.5$  Hz, 1H).

**<sup>13</sup>C NMR** (126 MHz, Chloroform-d)  $\delta$  136.6 (d,  $J = 2.3$  Hz), 135.9 (d,  $J = 5.9$  Hz), 134.7, 134.6, 134.5 (d,  $J = 2.2$  Hz), 134.2 (d,  $J = 7.3$  Hz), 133.7 (d,  $J = 7.8$  Hz), 132.64, 132.55, 132.4, 132.3, 129.6 (d,  $J = 5.7$  Hz), 129.4, 129.0 (d,  $J = 13.6$  Hz), 128.7 (d,  $J = 1.6$  Hz), 128.6, 128.4, 128.2, 128.1, 128.1, 128.0, 127.9, 127.8, 127.7, 127.6, 127.3 (d,  $J = 2.2$  Hz), 126.9, 126.8, 126.4, 126.1 (d,  $J = 9.8$  Hz), 124.6 (d,  $J = 7.2$  Hz), 52.3 (d,  $J = 65.3$  Hz).

**<sup>31</sup>P NMR** (202 MHz, Chloroform-d)  $\delta$  31.68.

**HRMS (ESI) m/z:**  $[M+H]^+$  Calcd. for  $C_{35}H_{28}OP^+$  495.1872.; Found: 495.1869.

### (E)-(1,3-diphenylallyl)di(naphthalen-1-yl)phosphine oxide (4i)

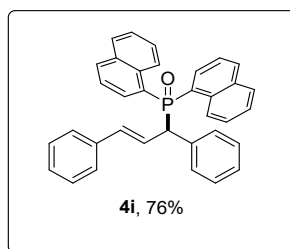

Following the **general procedure 4** on 0.2 mmol scale, White solid (mp: 235-237 °C), yield: 76% (75.1 mg),  $R_f = 0.3$  (silica gel, PE: EA = 1:1, v/v), column chromatography (silica gel, PE: EA = 3:1, v/v).

**$^1\text{H NMR}$**  (500 MHz, Chloroform-d)  $\delta$  8.80 (d,  $J = 8.5$  Hz, 1H), 8.62 (d,  $J = 8.6$  Hz, 1H), 8.16 (dd,  $J = 14.3, 7.1$  Hz, 1H), 7.97 (d,  $J = 8.3$  Hz, 1H), 7.91 – 7.84 (m, 2H), 7.83 – 7.71 (m, 2H), 7.49 (td,  $J = 7.7, 2.6$  Hz, 1H), 7.44 – 7.28 (m, 7H), 7.24 – 7.04 (m, 8H), 6.81 (dt,  $J = 15.6, 8.8$  Hz, 1H), 6.41 (dd,  $J = 15.9, 3.3$  Hz, 1H), 4.82 (t,  $J = 9.0$  Hz, 1H).

**$^{13}\text{C NMR}$**  (126 MHz, Chloroform-d)  $\delta$  136.9 (d,  $J = 5.6$  Hz), 136.8 (d,  $J = 1.8$  Hz), 134.3, 134.23, 134.17, 134.0 (d,  $J = 3.3$  Hz), 133.9 (d,  $J = 2.0$  Hz), 133.6 (d,  $J = 9.1$  Hz), 133.0 (d,  $J = 3.0$  Hz), 132.8 (d,  $J = 3.0$  Hz), 132.1 (d,  $J = 2.8$  Hz), 132.0 (d,  $J = 2.8$  Hz), 129.9 (d,  $J = 28.6$  Hz), 129.6 (d,  $J = 5.9$  Hz), 129.1 (d,  $J = 29.0$  Hz), 128.8, 128.6, 128.5 (d,  $J = 1.7$  Hz), 128.3, 127.6, 127.2, 127.1 (d,  $J = 4.6$  Hz), 127.0, 126.6 (d,  $J = 4.4$  Hz), 126.4, 126.2 (d,  $J = 22.5$  Hz), 125.8 (d,  $J = 6.4$  Hz), 124.4, 124.25, 124.2, 124.1, 52.0 (d,  $J = 66.9$  Hz).

**$^{31}\text{P NMR}$**  (202 MHz, Chloroform-d)  $\delta$  36.10.

**HRMS (ESI) m/z:**  $[\text{M}+\text{H}]^+$  Calcd. for  $\text{C}_{35}\text{H}_{28}\text{OP}^+$  495.1872.; Found: 495.1869.

### dimethyl (E)-(1,3-diphenylallyl)phosphonate (4j)

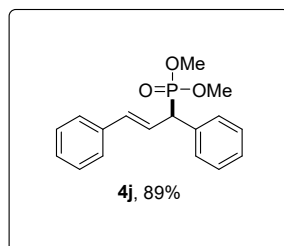

Following the **general procedure 4** on 0.2 mmol scale, yellow oil, yield: 89% (53.8 mg),  $R_f = 0.3$  (silica gel, PE: EA = 1:1, v/v), column chromatography (silica gel, PE: EA = 3:1, v/v).

**$^1\text{H NMR}$**  (500 MHz, Chloroform-d)  $\delta$  7.49 – 7.43 (m, 2H), 7.42 – 7.34 (m, 4H), 7.32 – 7.27 (m, 3H), 7.24 (d,  $J = 7.7$  Hz, 1H), 6.63 – 6.47 (m, 2H), 4.03 (dd,  $J = 24.8, 8.2$  Hz, 1H), 3.73 (d,  $J = 10.7$  Hz, 3H), 3.55 (d,  $J = 10.6$  Hz, 3H).

**$^{13}\text{C NMR}$**  (126 MHz, Chloroform-d)  $\delta$  136.6 (d,  $J = 2.7$  Hz), 135.6 (d,  $J = 7.5$  Hz), 133.9 (d,  $J = 14.0$  Hz), 129.0 (d,  $J = 7.1$  Hz), 128.8 (d,  $J = 2.4$  Hz), 128.6, 127.8, 127.5 (d,  $J = 2.8$  Hz), 126.5 (d,  $J = 1.8$  Hz), 124.2 (d,  $J = 9.6$  Hz), 53.6 (d,  $J = 7.2$  Hz), 49.5, 48.4.

**$^{31}\text{P NMR}$**  (202 MHz, Chloroform-d)  $\delta$  27.14.

**HRMS (ESI) m/z:**  $[\text{M}+\text{H}]^+$  Calcd. for  $\text{C}_{17}\text{H}_{20}\text{O}_3\text{P}^+$  303.1145.; Found: 303.1143.

### diethyl (E)-(1,3-diphenylallyl)phosphonate (4k)

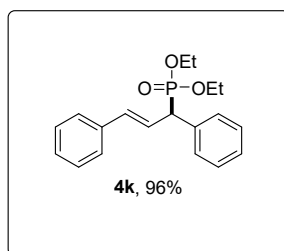

Following the **general procedure 4** on 0.2 mmol scale, yellow oil, yield: 96% (63.4 mg),  $R_f = 0.3$  (silica gel, PE: EA = 1:1, v/v), column chromatography (silica gel, PE: EA = 3:1, v/v).

**$^1\text{H NMR}$**  (500 MHz, Chloroform- $d$ )  $\delta$  7.49 – 7.43 (m, 2H), 7.40 – 7.33 (m, 4H), 7.33 – 7.26 (m, 3H), 7.25 – 7.19 (m, 1H), 6.63 – 6.47 (m, 2H), 4.14 – 4.04 (m, 2H), 4.03 – 3.93 (m, 2H), 3.81 (ddq,  $J = 10.2, 8.4, 7.1$  Hz, 1H), 1.26 (t,  $J = 7.1$  Hz, 3H), 1.13 (t,  $J = 7.1$  Hz, 3H).

**$^{13}\text{C NMR}$**  (126 MHz, Chloroform- $d$ )  $\delta$  136.8 (d,  $J = 2.9$  Hz), 136.0 (d,  $J = 7.3$  Hz), 133.7 (d,  $J = 13.9$  Hz), 129.1 (d,  $J = 7.1$  Hz), 128.7 (d,  $J = 2.2$  Hz), 128.5, 127.69, 127.3 (d,  $J = 2.9$  Hz), 126.5 (d,  $J = 1.9$  Hz), 124.7 (d,  $J = 9.6$  Hz), 62.7 (dd,  $J = 15.7, 7.1$  Hz), 49.5 (d,  $J = 137.2$  Hz), 16.4 (dd,  $J = 23.7, 5.8$  Hz).

**$^{31}\text{P NMR}$**  (202 MHz, Chloroform- $d$ )  $\delta$  24.83.

**HRMS (ESI)  $m/z$ :**  $[\text{M}+\text{H}]^+$  Calcd. for  $\text{C}_{19}\text{H}_{24}\text{O}_3\text{P}^+$  331.1458.; Found: 331.1456.

### (E)-(3-(phenylsulfonyl)prop-1-ene-1,3-diyl)dibenzene (6a)

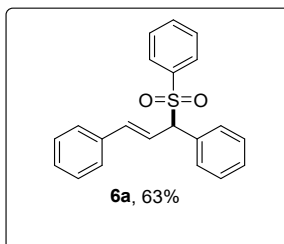

Following the **general procedure 4** on 0.2 mmol scale, White solid (mp: 149-150 °C), yield: 63% (42.1 mg),  $R_f = 0.3$  (silica gel, PE: EA = 1:5, v/v), column chromatography (silica gel, PE: EA = 3:1, v/v).

**$^1\text{H NMR}$**  (500 MHz, Chloroform- $d$ )  $\delta$  7.75 – 7.66 (m, 2H), 7.59 (td,  $J = 7.4, 1.4$  Hz, 1H), 7.44 (t,  $J = 7.8$  Hz, 2H), 7.41 – 7.27 (m, 10H), 6.66 – 6.50 (m, 2H), 4.88 (d,  $J = 8.7$  Hz, 1H).

**$^{13}\text{C NMR}$**  (126 MHz, Chloroform- $d$ )  $\delta$  138.2, 137.4, 135.9, 133.7, 132.3, 129.7, 129.3, 129.0, 128.74, 128.70, 128.66, 128.5, 126.7, 120.0, 75.4.

**HRMS (ESI)  $m/z$ :**  $[\text{M}+\text{H}]^+$  Calcd. for  $\text{C}_{21}\text{H}_{19}\text{O}_2\text{S}^+$  335.1100.; Found: 335.1099.



**(E)-(3-tosylprop-1-ene-1,3-diyl)dibenzene (6b)**

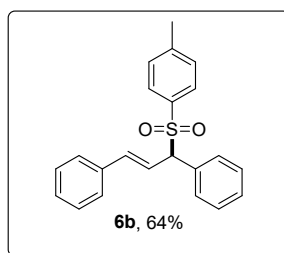

Following the **general procedure 4** on 0.2 mmol scale, White solid (mp: 162-164 °C), yield: 64% (44.6 mg),  $R_f = 0.3$  (silica gel, PE: EA = 1:5, v/v), column chromatography (silica gel, PE: EA = 3:1, v/v).

**$^1\text{H NMR}$**  (500 MHz, Chloroform- $d$ )  $\delta$  7.61 – 7.53 (m, 2H), 7.41 – 7.32 (m, 9H), 7.32 – 7.27 (m, 1H), 7.23 (d,  $J = 8.0$  Hz, 2H), 6.67 – 6.52 (m, 2H), 4.86 (d,  $J = 8.3$  Hz, 1H), 2.42 (s, 3H).

**$^{13}\text{C NMR}$**  (126 MHz, Chloroform- $d$ )  $\delta$  144.6, 138.0, 136.0, 134.5, 132.5, 129.7, 129.4, 129.3, 128.9, 128.7, 128.6, 128.5, 126.8, 120.3, 75.4, 21.6.

**HRMS (ESI)  $m/z$ :**  $[\text{M}+\text{H}]^+$  Calcd. for  $\text{C}_{22}\text{H}_{21}\text{O}_2\text{S}^+$  349.1257.; Found: 349.1254.

**(E)-(3-((4-isopropylphenyl)sulfonyl)prop-1-ene-1,3-diyl)dibenzene (6c)**

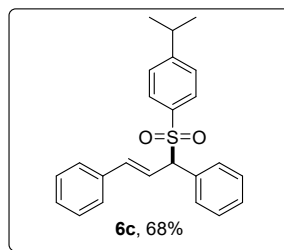

Following the **general procedure 4** on 0.2 mmol scale, White solid (mp: 158-160 °C), yield: 68% (51.2 mg),  $R_f = 0.3$  (silica gel, PE: EA = 1:5, v/v), column chromatography (silica gel, PE: EA = 3:1, v/v).

**$^1\text{H NMR}$**  (500 MHz, Chloroform- $d$ )  $\delta$  7.58 (d,  $J = 8.0$  Hz, 2H), 7.37 – 7.29 (m, 9H), 7.26 (t,  $J = 8.0$  Hz, 3H), 6.58 (dd,  $J = 15.7, 9.0$  Hz, 1H), 6.49 (d,  $J = 15.7$  Hz, 1H), 4.82 (d,  $J = 8.9$  Hz, 1H), 2.94 (p,  $J = 6.9$  Hz, 1H), 1.23 (d,  $J = 6.9$  Hz, 6H).

**$^{13}\text{C NMR}$**  (126 MHz, Chloroform- $d$ )  $\delta$  155.3, 138.0, 136.0, 134.7, 132.4, 129.7, 129.5, 128.9, 128.7, 128.6, 128.5, 126.8, 126.8, 120.3, 75.5, 34.2, 23.6.

**HRMS (ESI)  $m/z$ :**  $[\text{M}+\text{H}]^+$  Calcd. for  $\text{C}_{24}\text{H}_{25}\text{O}_2\text{S}^+$  377.1570.; Found: 377.1579.

**(E)-(3-((4-methoxyphenyl)sulfonyl)prop-1-ene-1,3-diyl)dibenzene (6d)**

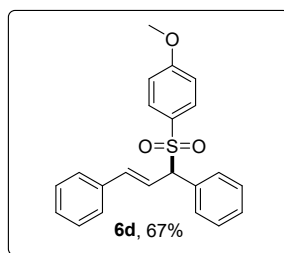

Following the **general procedure 4** on 0.2 mmol scale, White solid (mp: 114-115 °C), yield: 67% (48.8 mg),  $R_f = 0.3$  (silica gel, PE: EA = 1:3, v/v), column chromatography (silica gel, PE: EA = 3:1, v/v).

**$^1\text{H NMR}$**  (500 MHz, Chloroform- $d$ )  $\delta$  7.58 (d,  $J = 8.9$  Hz, 2H), 7.40 – 7.24 (m, 10H), 6.87 (d,  $J = 8.9$  Hz, 2H), 6.68 – 6.48 (m, 2H), 4.83 (d,  $J = 7.8$  Hz, 1H), 3.83 (s, 3H).

**$^{13}\text{C NMR}$**  (126 MHz, Chloroform- $d$ )  $\delta$  163.7, 137.9, 136.0, 132.7, 131.5, 129.7, 128.9, 128.9, 128.69, 128.65, 128.5, 126.8, 120.4, 113.9, 75.6, 55.7.

**HRMS (ESI)  $m/z$ :**  $[\text{M}+\text{H}]^+$  Calcd. for  $\text{C}_{22}\text{H}_{21}\text{O}_3\text{S}^+$  365.1206.; Found: 387.1029.

**(E)-(3-((4-fluorophenyl)sulfonyl)prop-1-ene-1,3-diyl)dibenzene (6e)**

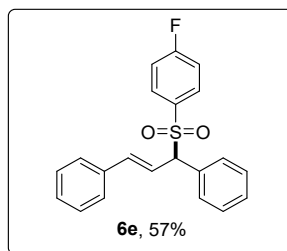

Following the **general procedure 4** on 0.2 mmol scale, White solid (mp: 115-117 °C), yield: 57% (40.1 mg),  $R_f = 0.3$  (silica gel, PE: EA = 1:5, v/v), column chromatography (silica gel, PE: EA = 3:1, v/v).

**$^1\text{H NMR}$**  (500 MHz, Chloroform- $d$ )  $\delta$  7.82 (d,  $J = 8.1$  Hz, 2H), 7.70 (d,  $J = 8.2$  Hz, 2H), 7.40 – 7.30 (m, 10H), 6.60 (d,  $J = 4.1$  Hz, 2H), 4.89 (t,  $J = 4.1$  Hz, 1H).

**$^{13}\text{C NMR}$**  (126 MHz, Chloroform- $d$ )  $\delta$  141.0, 138.9, 135.6, 131.7, 129.9, 129.7, 129.3, 128.9, 128.79, 128.75, 126.8, 125.8 (d,  $J = 3.8$  Hz), 119.1, 75.6.

**$^{19}\text{F NMR}$**  (471 MHz, Chloroform- $d$ )  $\delta$  -63.18.

**HRMS (ESI)  $m/z$ :**  $[\text{M}+\text{H}]^+$  Calcd. for  $\text{C}_{21}\text{H}_{18}\text{FO}_2\text{S}^+$  353.1006.; Found: 353.1002.

**(E)-(3-((4-chlorophenyl)sulfonyl)prop-1-ene-1,3-diyl)dibenzene (6f)**

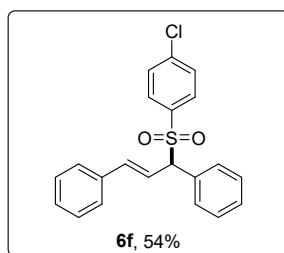

Following the **general procedure 4** on 0.2 mmol scale, White solid (mp: 138-139 °C), yield: 54% (39.8 mg),  $R_f = 0.3$  (silica gel, PE: EA = 1:5, v/v), column chromatography (silica gel, PE: EA = 3:1, v/v).

**$^1\text{H NMR}$**  (500 MHz, Chloroform- $d$ )  $\delta$  7.63 – 7.54 (m, 2H), 7.41 – 7.31 (m, 11H), 7.29 (d,  $J = 7.0$  Hz, 1H), 6.62 – 6.53 (m, 2H), 4.84 (dd,  $J = 5.3, 3.0$  Hz, 1H).

**$^{13}\text{C NMR}$**  (126 MHz, Chloroform- $d$ )  $\delta$  140.4, 138.6, 136.0, 135.7, 132.1, 130.8, 129.7, 129.1, 129.0, 128.9, 128.7, 126.82 119.5, 75.5.

**HRMS (ESI)  $m/z$ :**  $[\text{M}+\text{H}]^+$  Calcd. for  $\text{C}_{21}\text{H}_{18}\text{ClO}_2\text{S}^+$  369.0711.; Found: 369.0712

**(E)-(3-((4-bromophenyl)sulfonyl)prop-1-ene-1,3-diyl)dibenzene (6g)**

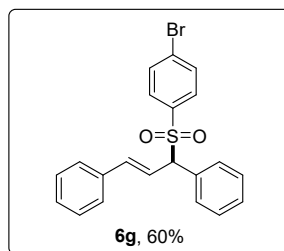

Following the **general procedure 4** on 0.2 mmol scale, White solid (mp:153-155 °C), yield: 60% (49.4 mg),  $R_f = 0.3$  (silica gel, PE: EA = 1:5, v/v), column chromatography (silica gel, PE: EA = 3:1, v/v).

**$^1\text{H NMR}$**  (500 MHz, Chloroform- $d$ )  $\delta$  7.63 – 7.47 (m, 4H), 7.43 – 7.28 (m, 10H), 6.66 – 6.53 (m, 2H), 4.85 (dd,  $J = 6.2, 2.1$  Hz, 1H).

**$^{13}\text{C NMR}$**  (126 MHz, Chloroform- $d$ )  $\delta$  138.6, 136.5, 135.7, 132.0, 132.0, 130.8, 129.7, 129.2, 129.1, 128.9, 128.7, 128.7, 126.8, 119.5, 75.5.

**HRMS (ESI)  $m/z$ :**  $[\text{M}+\text{H}]^+$  Calcd. for  $\text{C}_{21}\text{H}_{18}\text{BrO}_2\text{S}^+$  413.0205.; Found: 413.0207.

**(E)-(3-((4-(trifluoromethyl)phenyl)sulfonyl)prop-1-ene-1,3-diyl)dibenzene (6h)**

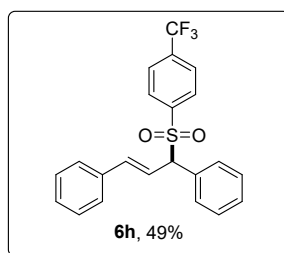

Following the **general procedure 4** on 0.2 mmol scale, White solid (mp: 118-120 °C), yield: 49% (39.4 mg),  $R_f = 0.3$  (silica gel, PE: EA = 1:3, v/v), column chromatography (silica gel, PE: EA = 3:1, v/v).

**$^1\text{H NMR}$**  (500 MHz, Chloroform- $d$ )  $\delta$  7.74 (dd,  $J = 58.3, 8.2$  Hz, 4H), 7.35 (dt,  $J = 7.1, 5.4$  Hz, 9H), 7.30 (d,  $J = 6.9$  Hz, 1H), 6.63 – 6.52 (m, 2H), 4.92 – 4.82 (m, 1H).

**$^{13}\text{C NMR}$**  (126 MHz, Chloroform- $d$ )  $\delta$  141.1, 138.9, 135.6, 135.3 (d,  $J = 33.0$  Hz), 131.7, 129.9, 129.7, 129.3, 128.9, 128.8, 128.7, 126.8, 125.8 (q,  $J = 3.6$  Hz), 119.1, 75.6.

**$^{19}\text{F NMR}$**  (471 MHz, Chloroform- $d$ )  $\delta$  -63.17.

**HRMS (ESI) m/z:**  $[\text{M}+\text{Na}]^+$  Calcd. for  $\text{C}_{22}\text{H}_{18}\text{F}_3\text{O}_2\text{S}^+$  425.0974.; Found: 425.0792.

**(E)-(3-((3-nitrophenyl)sulfonyl)prop-1-ene-1,3-diyl)dibenzene (6i)**

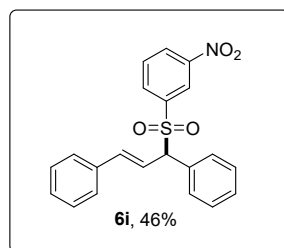

Following the **general procedure 4** on 0.2 mmol scale, White solid (mp: 180-182 °C), yield: 46% (34.9 mg),  $R_f = 0.2$  (silica gel, PE: EA = 1:3, v/v), column chromatography (silica gel, PE: EA = 3:1, v/v).

**$^1\text{H NMR}$**  (500 MHz, Chloroform- $d$ )  $\delta$  8.50 (t,  $J = 2.0$  Hz, 1H), 8.40 (ddd,  $J = 8.2, 2.3, 1.1$  Hz, 1H), 7.95 (dt,  $J = 7.9, 1.4$  Hz, 1H), 7.61 (t,  $J = 8.0$  Hz, 1H), 7.39 – 7.31 (m, 9H), 7.31 – 7.27 (m, 1H), 6.60 (d,  $J = 7.7$  Hz, 2H), 4.90 (dd,  $J = 7.1, 1.1$  Hz, 1H).

**$^{13}\text{C NMR}$**  (126 MHz, Chloroform- $d$ )  $\delta$  148.0, 139.7, 139.3, 135.5, 134.8, 131.5, 130.0, 129.7, 129.5, 129.0, 128.9, 128.8, 128.1, 126.9, 124.5, 118.7, 75.7.

**HRMS (ESI) m/z:**  $[\text{M}+\text{H}]^+$  Calcd. for  $\text{C}_{21}\text{H}_{18}\text{NO}_4\text{S}^+$  380.0951.; Found: 380.0953.

**(E)-(3-((4-(trifluoromethoxy)phenyl)sulfonyl)prop-1-ene-1,3-diyl)dibenzene (6j)**

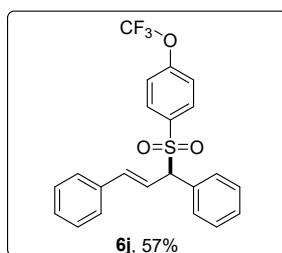

Following the **general procedure 4** on 0.2 mmol scale, White solid (mp: 134-136 °C), yield: 57% (47.7 mg),  $R_f = 0.4$  (silica gel, PE: EA = 1:5, v/v), column chromatography (silica gel, PE: EA = 3:1, v/v).

**$^1\text{H NMR}$**  (500 MHz, Chloroform- $d$ )  $\delta$  7.71 (dd,  $J = 8.6, 1.3$  Hz, 2H), 7.38 – 7.31 (m, 9H), 7.31 – 7.27 (m, 1H), 7.23 (d,  $J = 8.4$  Hz, 2H), 6.58 (d,  $J = 6.4$  Hz, 2H), 4.85 (dd,  $J = 6.8, 1.5$  Hz, 1H).

**$^{13}\text{C NMR}$**  (126 MHz, Chloroform- $d$ )  $\delta$  152.9, 138.7, 135.7, 132.0, 131.6, 129.7, 129.2, 128.9, 128.7 (d,  $J = 1.5$  Hz), 128.6 (d,  $J = 7.3$  Hz), 127.8, 126.8, 126.5 (d,  $J = 32.7$  Hz), 120.4, 119.4, 75.6.

**$^{19}\text{F NMR}$**  (471 MHz, Chloroform- $d$ )  $\delta$  -57.70.

**HRMS (ESI)  $m/z$ :**  $[\text{M}+\text{H}]^+$  Calcd. for  $\text{C}_{22}\text{H}_{18}\text{F}_3\text{O}_3\text{S}^+$  419.0923.; Found: 410.0922.

**(E)-N-(4-((1,3-diphenylallyl)sulfonyl)phenyl)acetamide (6k)**

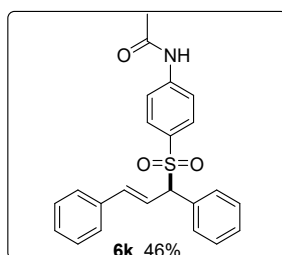

Following the **general procedure 4** on 0.2 mmol scale, White solid (mp: 193-195 °C), yield: 46% (36.0 mg),  $R_f = 0.4$  (silica gel, PE: EA = 1:1, v/v), column chromatography (silica gel, PE: EA = 3:1, v/v).

**$^1\text{H NMR}$**  (500 MHz, DMSO- $d_6$ )  $\delta$  10.35 (s, 1H), 7.80 – 7.52 (m, 4H), 7.50 – 7.22 (m, 10H), 6.68 (dd,  $J = 15.6, 9.6$  Hz, 1H), 6.56 (d,  $J = 15.6$  Hz, 1H), 5.38 (d,  $J = 9.6$  Hz, 1H), 2.08 (s, 3H).

**$^{13}\text{C NMR}$**  (126 MHz, DMSO- $d_6$ )  $\delta$  169.7, 144.4, 137.8, 136.2, 133.3, 131.2, 130.5, 130.3, 129.2, 129.0, 128.85, 127.1, 121.4, 118.5, 73.7, 24.7.

**HRMS (ESI)  $m/z$ :**  $[\text{M}+\text{H}]^+$  Calcd. for  $\text{C}_{23}\text{H}_{22}\text{NO}_3\text{S}^+$  392.1315.; Found: 392.1312.

**(E)-(3-(ethylsulfonyl)prop-1-ene-1,3-diyl)dibenzene (6l)**

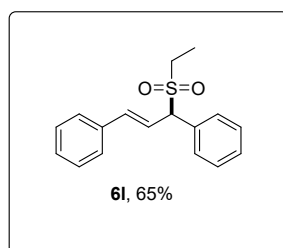

Following the **general procedure 4** on 0.2 mmol scale, White solid (mp: 104-105 °C), yield: 65% (37.2 mg),  $R_f = 0.3$  (silica gel, PE: EA = 1:3, v/v), column chromatography (silica gel, PE: EA = 3:1, v/v).

**$^1\text{H NMR}$**  (500 MHz, Chloroform- $d$ )  $\delta$  7.58 – 7.53 (m, 2H), 7.43 (tdd,  $J = 8.6, 5.9, 4.2$  Hz, 5H), 7.37 – 7.31 (m, 2H), 7.31 – 7.26 (m, 1H), 6.77 (d,  $J = 15.7$  Hz, 1H), 6.65 (dd,  $J = 15.7, 9.1$  Hz, 1H), 4.88 (d,  $J = 9.1$  Hz, 1H), 2.94 (q,  $J = 7.5$  Hz, 2H), 1.36 (t,  $J = 7.4$  Hz, 3H).

**$^{13}\text{C NMR}$**  (126 MHz, Chloroform- $d$ )  $\delta$  137.7, 135.7, 132.3, 129.5, 129.18, 129.16, 128.72, 128.68, 126.9, 120.4, 71.6, 45.2, 6.5.

**HRMS (ESI)  $m/z$ :**  $[\text{M}+\text{H}]^+$  Calcd. for  $\text{C}_{17}\text{H}_{19}\text{O}_2\text{S}^+$  287.1100.; Found: 287.1097.

**(E)-(3-(cyclopropylsulfonyl)prop-1-ene-1,3-diyl)dibenzene (6m)**

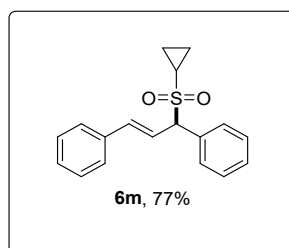

Following the **general procedure 4** on 0.2 mmol scale, White solid (mp: 159-161 °C), yield: 77% (45.9 mg),  $R_f = 0.3$  (silica gel, PE: EA = 1:3, v/v), column chromatography (silica gel, PE: EA = 3:1, v/v).

**$^1\text{H NMR}$**  (500 MHz, Chloroform- $d$ )  $\delta$  7.60 – 7.54 (m, 2H), 7.47 – 7.37 (m, 5H), 7.37 – 7.31 (m, 2H), 7.31 – 7.26 (m, 1H), 6.80 (d,  $J = 15.7$  Hz, 1H), 6.67 (dd,  $J = 15.7, 9.1$  Hz, 1H), 4.89 (d,  $J = 9.1$  Hz, 1H), 2.25 (tt,  $J = 8.1, 4.8$  Hz, 1H), 1.29 – 1.11 (m, 2H), 1.02 – 0.85 (m, 2H).

**$^{13}\text{C NMR}$**  (126 MHz, Chloroform- $d$ )  $\delta$  137.7, 135.9, 132.6, 129.7, 129.1, 129.0, 128.7, 128.6, 126.9, 120.4, 73.1, 28.1, 5.20, 5.0.

**HRMS (ESI)  $m/z$ :**  $[\text{M}+\text{H}]^+$  Calcd. for  $\text{C}_{18}\text{H}_{19}\text{O}_2\text{S}^+$  299.1100.; Found: 299.1106.

### (E)-2-((1,3-diphenylallyl)sulfonyl)naphthalene (6n)

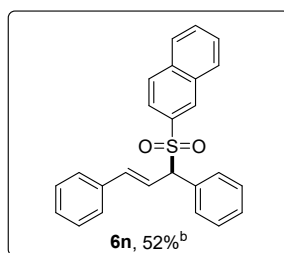

Following the **general procedure 4** on 0.2 mmol scale, White solid (mp: 172-174 °C), yield: 52% (39.9 mg),  $R_f = 0.4$  (silica gel, PE: EA = 1:5, v/v), column chromatography (silica gel, PE: EA = 3:1, v/v).

**<sup>1</sup>H NMR** (500 MHz, Chloroform-d)  $\delta$  8.28 (d,  $J = 1.8$  Hz, 1H), 7.98 – 7.82 (m, 3H), 7.74 – 7.56 (m, 3H), 7.34 (dtdd,  $J = 19.8, 12.1, 8.2, 4.2$  Hz, 10H), 6.67 (dd,  $J = 15.7, 8.9$  Hz, 1H), 6.58 (d,  $J = 15.7$  Hz, 1H), 4.97 (d,  $J = 8.8$  Hz, 1H).

**<sup>13</sup>C NMR** (126 MHz, Chloroform-d)  $\delta$  138.3, 135.9, 135.2, 134.4, 132.4, 131.9, 131.3, 129.8, 129.4, 129.3, 129.0, 128.7, 128.7, 128.6, 128.5, 127.9, 127.5, 126.8, 124.0, 120.0, 75.6.

**HRMS (ESI) m/z:**  $[M+H]^+$  Calcd. for  $C_{25}H_{21}O_2S^+$  385.1257.; Found: 385.1259.

### (E)-2-((1,3-diphenylallyl)sulfonyl)thiophene (6o)

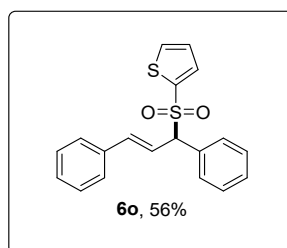

Following the **general procedure 4** on 0.2 mmol scale, White solid (mp: 195-197 °C), yield: 56% (38.1 mg),  $R_f = 0.3$  (silica gel, PE: EA = 1:3, v/v), column chromatography (silica gel, PE: EA = 3:1, v/v).

**<sup>1</sup>H NMR** (500 MHz, Chloroform-d)  $\delta$  7.63 (dd,  $J = 4.9, 1.3$  Hz, 1H), 7.44 – 7.31 (m, 10H), 7.31 – 7.26 (m, 1H), 7.03 (dd,  $J = 4.9, 3.8$  Hz, 1H), 6.68 – 6.58 (m, 2H), 4.95 (dd,  $J = 5.7, 2.6$  Hz, 1H).

**<sup>13</sup>C NMR** (126 MHz, Chloroform-d)  $\delta$  138.5, 138.1, 135.9, 135.4, 134.6, 132.4, 129.7, 129.1, 128.8, 128.7, 128.62, 127.56, 126.9, 119.9.

**HRMS (ESI) m/z:**  $[M+H]^+$  Calcd. for  $C_{19}H_{17}O_2S_2^+$  341.0664.; Found: 341.0665.

### diethyl (E)-(1,3-bis(4-fluorophenyl)allyl)phosphonate (7a)

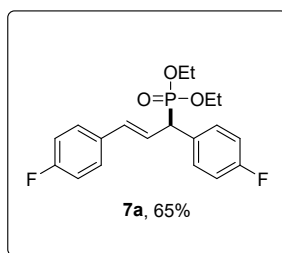

Following the **general procedure 4** on 0.2 mmol scale, yellow oil, yield: 65% (47.6 mg),  $R_f = 0.3$  (silica gel, PE: EA = 1:1, v/v), column chromatography (silica gel, PE: EA = 3:1, v/v).

**$^1\text{H}$  NMR** (500 MHz, Chloroform- $d$ )  $\delta$  7.41 (ddd,  $J = 8.9, 5.2, 2.3$  Hz, 2H), 7.36 – 7.30 (m, 2H), 7.07 – 7.01 (m, 2H), 7.01 – 6.95 (m, 2H), 6.51 (dd,  $J = 15.8, 4.3$  Hz, 1H), 6.39 (dt,  $J = 16.0, 8.3$  Hz, 1H), 4.16 – 4.03 (m, 2H), 4.03 – 3.89 (m, 2H), 3.83 (ddq,  $J = 10.1, 8.5, 7.1$  Hz, 1H), 1.26 (t,  $J = 7.0$  Hz, 3H), 1.14 (t,  $J = 7.1$  Hz, 3H).

**$^{13}\text{C}$  NMR** (126 MHz, Chloroform- $d$ )  $\delta$  164.0 – 162.8 (m), 161.7 – 160.8 (m), 132.8 (t,  $J = 3.0$  Hz), 132.6 (d,  $J = 13.7$  Hz), 131.7 (dd,  $J = 7.3, 3.3$  Hz), 130.6 (t,  $J = 7.5$  Hz), 128.0 (dd,  $J = 8.2, 1.7$  Hz), 124.1 (dd,  $J = 9.5, 2.3$  Hz), 115.5 (d,  $J = 21.7$  Hz), 62.8 (dd,  $J = 15.6, 7.2$  Hz), 48.4 (d,  $J = 138.3$  Hz), 16.4 (dd,  $J = 20.4, 5.9$  Hz).

**$^{31}\text{P}$  NMR** (202 MHz, Chloroform- $d$ )  $\delta$  24.48 (d,  $J = 4.6$  Hz).

**$^{19}\text{F}$  NMR** (471 MHz, Chloroform- $d$ )  $\delta$  -114.09 (d,  $J = 2.3$  Hz), -115.15 (d,  $J = 4.4$  Hz).

**HRMS (ESI) m/z:**  $[\text{M}+\text{H}]^+$  Calcd. for  $\text{C}_{19}\text{H}_{22}\text{F}_2\text{O}_3\text{P}^+$  367.1269.; Found: 367.1271.

### diethyl (E)-(1,3-bis(4-chlorophenyl)allyl)phosphonate (7b)

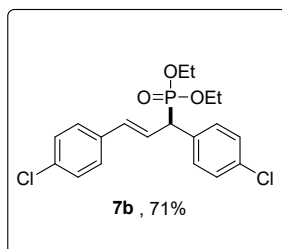

Following the **general procedure 4** on 0.2 mmol scale, yellow oil, yield: 71% (52.5 mg),  $R_f = 0.3$  (silica gel, PE: EA = 1:1, v/v), column chromatography (silica gel, PE: EA = 3:1, v/v).

**$^1\text{H}$  NMR** (500 MHz, Chloroform- $d$ )  $\delta$  7.40 – 7.30 (m, 4H), 7.30 – 7.23 (m, 4H), 6.52 – 6.39 (m, 2H), 4.13 – 4.03 (m, 2H), 4.03 – 3.89 (m, 2H), 3.89 – 3.80 (m, 1H), 1.26 (t,  $J = 7.1$  Hz, 3H), 1.15 (t,  $J = 7.0$  Hz, 3H).

**$^{13}\text{C}$  NMR** (126 MHz, Chloroform- $d$ )  $\delta$  135.0 (d,  $J = 1.8$  Hz), 134.3 (d,  $J = 6.9$  Hz), 133.5, 133.3 (d,  $J = 2.6$  Hz), 132.8 (d,  $J = 13.4$  Hz), 130.4 (d,  $J = 6.4$  Hz), 128.9, 128.8, 127.7, 124.8 (d,  $J = 9.1$  Hz), 62.9 (dd,  $J = 13.5, 6.6$  Hz), 49.3, 48.2.

**$^{31}\text{P}$  NMR** (202 MHz, Chloroform- $d$ )  $\delta$  23.98.

**HRMS (ESI) m/z:**  $[\text{M}+\text{H}]^+$  Calcd. for  $\text{C}_{19}\text{H}_{22}\text{Cl}_2\text{O}_3\text{P}^+$  399.0678.; Found: 399.0679.



### diethyl (E)-(1,3-bis(4-bromophenyl)allyl)phosphonate (7c)

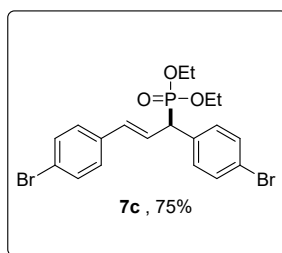

Following the **general procedure 4** on 0.2 mmol scale, yellow oil, yield: 75% (72.9 mg),  $R_f = 0.3$  (silica gel, PE: EA = 1:1, v/v), column chromatography (silica gel, PE: EA = 3:1, v/v).

**$^1\text{H NMR}$**  (500 MHz, Chloroform- $d$ )  $\delta$  7.48 (d,  $J = 8.2$  Hz, 2H), 7.45 – 7.39 (m, 2H), 7.32 (dd,  $J = 8.5$ , 2.3 Hz, 2H), 7.23 (d,  $J = 8.3$  Hz, 2H), 6.53 – 6.38 (m, 2H), 4.14 – 4.03 (m, 2H), 4.03 – 3.89 (m, 2H), 3.85 (dddd,  $J = 10.0$ , 8.2, 7.0, 2.2 Hz, 1H), 1.26 (d,  $J = 5.1$  Hz, 3H), 1.15 (t,  $J = 7.1$  Hz, 3H).

**$^{13}\text{C NMR}$**  (126 MHz, Chloroform- $d$ )  $\delta$  135.4 (d,  $J = 2.5$  Hz), 134.8 (d,  $J = 7.3$  Hz), 132.9 (d,  $J = 13.6$  Hz), 131.9 (d,  $J = 1.8$  Hz), 131.7, 130.7 (d,  $J = 6.8$  Hz), 128.0, 124.9 (d,  $J = 9.4$  Hz), 121.7, 121.4 (d,  $J = 3.5$  Hz), 62.9 (dd,  $J = 12.9$ , 7.0 Hz), 49.3, 48.2.

**$^{31}\text{P NMR}$**  (202 MHz, Chloroform- $d$ )  $\delta$  23.72.

**HRMS (ESI) m/z:**  $[\text{M}+\text{Na}]^+$  Calcd. for  $\text{C}_{19}\text{H}_{22}\text{Br}_2\text{O}_3\text{P}^+$  508.9487.; Found: 508.9489.

### diethyl (E)-(1,3-bis(4-iodophenyl)allyl)phosphonate (7d)

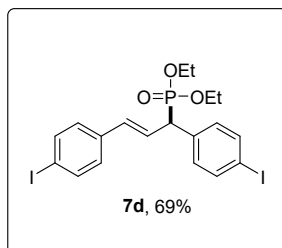

Following the **general procedure 4** on 0.2 mmol scale, yellow oil, yield: 69% (80.3 mg),  $R_f = 0.3$  (silica gel, PE: EA = 1:1, v/v), column chromatography (silica gel, PE: EA = 3:1, v/v).

**$^1\text{H NMR}$**  (500 MHz, Chloroform- $d$ )  $\delta$  7.67 (d,  $J = 8.1$  Hz, 2H), 7.64 – 7.58 (m, 2H), 7.18 (dd,  $J = 8.5$ , 2.2 Hz, 2H), 7.09 (d,  $J = 8.2$  Hz, 2H), 6.51 – 6.39 (m, 2H), 4.08 (dtd,  $J = 11.7$ , 7.2, 3.2 Hz, 2H), 4.03 – 3.80 (m, 3H), 1.26 (t,  $J = 7.1$  Hz, 3H), 1.15 (t,  $J = 7.1$  Hz, 3H).

**$^{13}\text{C NMR}$**  (126 MHz, Chloroform- $d$ )  $\delta$  137.8 (d,  $J = 2.2$  Hz), 137.7, 136.0 (d,  $J = 2.8$  Hz), 135.5 (d,  $J = 7.4$  Hz), 133.0 (d,  $J = 13.7$  Hz), 131.0 (d,  $J = 6.9$  Hz), 128.2 (d,  $J = 1.9$  Hz), 125.0 (d,  $J = 9.6$  Hz), 93.2, 92.9 (d,  $J = 4.1$  Hz), 62.9 (dd,  $J = 10.9$ , 7.2 Hz), 49.4, 48.3.

**$^{31}\text{P NMR}$**  (202 MHz, Chloroform- $d$ )  $\delta$  23.66.

**HRMS (ESI) m/z:**  $[\text{M}+\text{H}]^+$  Calcd. for  $\text{C}_{19}\text{H}_{22}\text{I}_2\text{O}_3\text{P}^+$  582.9390.; Found: 582.9385.

### diethyl ((2-phenyl-1H-indol-3-yl)methyl)phosphonate (**7e**)

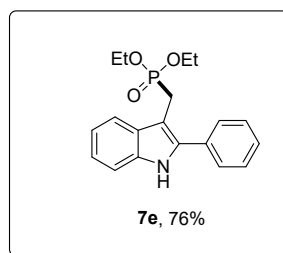

Following the **general procedure 4** on 0.2 mmol scale, yellow oil, yield: 76% (52.2 mg),  $R_f$  = 0.3 (silica gel, PE: EA = 1:1, v/v), column chromatography (silica gel, PE: EA = 3:1, v/v).

**$^1\text{H}$  NMR** (500 MHz, Chloroform- $d$ )  $\delta$  9.12 (s, 1H), 7.81 – 7.72 (m, 3H), 7.40 (dd,  $J$  = 8.3, 7.0 Hz, 2H), 7.36 – 7.29 (m, 2H), 7.16 (dddd,  $J$  = 20.0, 8.1, 7.1, 1.2 Hz, 2H), 4.03 – 3.85 (m, 4H), 3.42 (d,  $J$  = 20.3 Hz, 2H), 1.17 (t,  $J$  = 7.1 Hz, 6H).

**$^{13}\text{C}$  NMR** (126 MHz, Chloroform- $d$ )  $\delta$  136.5 (dd,  $J$  = 9.5, 4.6 Hz), 136.0 (d,  $J$  = 5.9 Hz), 132.7 (d,  $J$  = 3.3 Hz), 128.9 (d,  $J$  = 2.6 Hz), 128.8 (d,  $J$  = 2.5 Hz), 128.4, 127.8 (d,  $J$  = 3.1 Hz), 122.3 (d,  $J$  = 4.5 Hz), 120.0 (d,  $J$  = 3.2 Hz), 119.6 (d,  $J$  = 4.6 Hz), 111.1 (d,  $J$  = 7.7 Hz), 103.2 – 99.4 (m), 62.1 (d,  $J$  = 6.7 Hz), 23.7 (d,  $J$  = 145.2 Hz), 16.4 (d,  $J$  = 6.1 Hz).

**$^{31}\text{P}$  NMR** (202 MHz, Chloroform- $d$ )  $\delta$  27.56.

**HRMS (ESI)  $m/z$** :  $[\text{M}+\text{H}]^+$  Calcd. for  $\text{C}_{19}\text{H}_{23}\text{NO}_3\text{P}^+$  344.1410.; Found: 344.1409.

### diethyl (*E*)-(3-(4-ethylphenyl)-1-phenylallyl)phosphonate (**7f**)

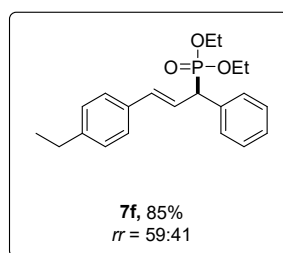

Following the **general procedure 4** on 0.2 mmol scale, yellow oil, yield: 85% (60.9 mg),  $R_f$  = 0.3 (silica gel, PE: EA = 1:1, v/v), column chromatography (silica gel, PE: EA = 3:1, v/v).

**$^1\text{H}$  NMR** (500 MHz, Chloroform- $d$ )  $\delta$  7.50 – 7.46 (m, 1H), 7.43 – 7.35 (m, 3H), 7.32 (td,  $J$  = 8.0, 3.0 Hz, 2H), 7.29 – 7.23 (m, 1H), 7.23 – 7.13 (m, 2H), 6.64 – 6.47 (m, 2H), 4.16 – 4.06 (m, 2H), 4.05 – 3.95 (m, 2H), 3.84 (ddt,  $J$  = 10.2, 8.4, 7.0 Hz, 1H), 2.66 (h,  $J$  = 7.6 Hz, 2H), 1.31 – 1.22 (m, 6H), 1.16 (td,  $J$  = 7.0, 5.4 Hz, 3H).

**$^{13}\text{C}$  NMR** (126 MHz, Chloroform- $d$ )  $\delta$  143.9, 143.3 (d,  $J$  = 3.0 Hz), 136.9 (d,  $J$  = 2.7 Hz), 136.2 (d,  $J$  = 7.3 Hz), 134.3 (d,  $J$  = 2.8 Hz), 133.6 (dd,  $J$  = 13.8, 11.9 Hz), 133.1 (d,  $J$  = 7.4 Hz), 129.0 (dd,  $J$  = 13.8, 7.0 Hz), 128.7 (d,  $J$  = 2.3 Hz), 128.5, 128.2 (d,  $J$  = 2.3 Hz), 128.1, 127.6, 127.2 (d,  $J$  = 2.9 Hz), 126.4 (d,  $J$  = 1.9 Hz), 124.9 (d,  $J$  = 9.4 Hz), 123.6 (d,  $J$  = 9.6 Hz), 66.8 – 57.3 (m), 28.6 (d,  $J$  = 13.6 Hz), 16.5 (d,  $J$  = 5.9 Hz), 16.3 (d,  $J$  = 5.8 Hz), 15.5.

**$^{31}\text{P}$  NMR** (202 MHz, Chloroform- $d$ )  $\delta$  25.09, 24.97.

**HRMS (ESI)  $m/z$** :  $[\text{M}+\text{H}]^+$  Calcd. for  $\text{C}_{21}\text{H}_{28}\text{O}_3\text{P}^+$  359.1771.; Found: 359.1775.

### diethyl (E)-(3-(4-fluorophenyl)-1-(p-tolyl)allyl)phosphonate (7g)

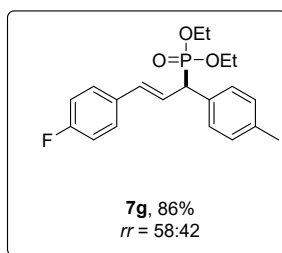

Following the **general procedure 4** on 0.2 mmol scale, yellow oil, yield: 86% (62.3 mg),  $R_f$  = 0.3 (silica gel, PE: EA = 1:1, v/v), column chromatography (silica gel, PE: EA = 3:1, v/v).

**$^1\text{H}$  NMR** (500 MHz, Chloroform- $d$ )  $\delta$  7.48 – 7.27 (m, 4H), 7.16 (dd,  $J$  = 25.2, 7.9 Hz, 2H), 7.03 (dt,  $J$  = 32.3, 8.7 Hz, 2H), 6.54 (dt,  $J$  = 15.8, 4.2 Hz, 1H), 6.45 (dt,  $J$  = 15.9, 8.2 Hz, 1H), 4.17 – 4.05 (m, 2H), 4.05 – 3.91 (m, 2H), 3.85 (dddd,  $J$  = 17.2, 10.1, 8.2, 6.9 Hz, 1H), 2.42 – 2.28 (m, 3H), 1.28 (dt,  $J$  = 7.0, 3.6 Hz, 3H), 1.16 (td,  $J$  = 7.1, 3.1 Hz, 3H).

**$^{13}\text{C}$  NMR** (126 MHz, Chloroform- $d$ )  $\delta$  162.3 (d,  $J$  = 246.9 Hz), 137.7, 137.0 (d,  $J$  = 3.1 Hz), 133.8 (d,  $J$  = 3.3 Hz), 133.7, 133.0 (t,  $J$  = 3.0 Hz), 132.7 (d,  $J$  = 7.3 Hz), 132.3 (d,  $J$  = 13.8 Hz), 131.9 (dd,  $J$  = 7.5, 3.2 Hz), 130.6 (t,  $J$  = 7.5 Hz), 129.5 (d,  $J$  = 2.3 Hz), 129.3, 128.9 (d,  $J$  = 6.9 Hz), 127.9 (dd,  $J$  = 7.9, 1.8 Hz), 126.4 (d,  $J$  = 1.8 Hz), 124.7 (dd,  $J$  = 9.5, 2.3 Hz), 123.2 (d,  $J$  = 9.5 Hz), 115.5 (dd,  $J$  = 21.6, 15.6 Hz), 65.5 – 55.1 (m), 48.7 (dd,  $J$  = 137.8, 48.1 Hz), 21.2 (d,  $J$  = 13.3 Hz), 16.4 (dd,  $J$  = 20.9, 5.8 Hz).

**$^{19}\text{F}$  NMR** (471 MHz, Chloroform- $d$ )  $\delta$  -114.38, -115.33 (d,  $J$  = 4.4 Hz).

**$^{31}\text{P}$  NMR** (202 MHz, Chloroform- $d$ )  $\delta$  24.99, 24.72.

**HRMS (ESI)  $m/z$ :**  $[\text{M}+\text{H}]^+$  Calcd. for  $\text{C}_{20}\text{H}_{25}\text{FO}_3\text{P}^+$  363.1520.; Found: 363.1521.

### diethyl (E)-(3-(4-bromophenyl)-1-phenylallyl)phosphonate (7h)

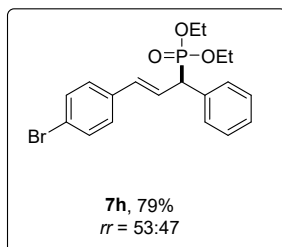

Following the **general procedure 4** on 0.2 mmol scale, yellow oil, yield: 79% (64.5 mg),  $R_f$  = 0.3 (silica gel, PE: EA = 1:1, v/v), column chromatography (silica gel, PE: EA = 3:1, v/v).

**$^1\text{H}$  NMR** (500 MHz, Chloroform- $d$ )  $\delta$  7.71 – 7.39 (m, 3H), 7.39 – 7.27 (m, 4H), 7.25 – 7.07 (m, 2H), 6.63 – 6.38 (m, 2H), 4.15 – 4.04 (m, 2H), 4.04 – 3.90 (m, 2H), 3.90 – 3.74 (m, 1H), 1.26 (td,  $J$  = 7.1, 2.5 Hz, 3H), 1.14 (dt,  $J$  = 24.3, 7.0 Hz, 3H).

**$^{13}\text{C}$  NMR** (126 MHz, Chloroform- $d$ )  $\delta$  137.8 (d,  $J$  = 2.2 Hz), 137.6, 136.5 (d,  $J$  = 2.6 Hz), 136.1 – 135.5 (m), 135.1 (d,  $J$  = 7.3 Hz), 134.1 (d,  $J$  = 13.8 Hz), 132.5 (t,  $J$  = 14.0 Hz), 131.8 (d,  $J$  = 2.2 Hz), 131.7, 131.0 (d,  $J$  = 6.8 Hz), 130.8 (d,  $J$  = 7.0 Hz), 129.1 (d,  $J$  = 6.8 Hz), 128.8 (d,  $J$  = 2.2 Hz), 128.6, 128.2 (d,  $J$  = 1.7 Hz), 128.0 (d,  $J$  = 1.7 Hz), 127.9, 127.4 (d,  $J$  = 2.8 Hz), 126.5 (d,  $J$  = 1.7 Hz), 125.6 (dd,  $J$  = 14.5, 9.5 Hz), 123.9 (d,  $J$  = 9.5 Hz), 122.2 – 120.1 (m), 64.8 – 58.8 (m), 49.1 (dd,  $J$  = 137.5, 81.1 Hz), 18.6 – 11.5 (m).

**$^{31}\text{P}$  NMR** (202 MHz, Chloroform- $d$ )  $\delta$  24.47 (d,  $J$  = 5.1 Hz), 24.05.

**HRMS (ESI)  $m/z$ :**  $[\text{M}+\text{H}]^+$  Calcd. for  $\text{C}_{19}\text{H}_{23}\text{BrO}_3\text{P}^+$  409.0563.; Found: 409.0566.

### diethyl (E)-(3-([1,1'-biphenyl]-4-yl)-1-phenylallyl)phosphonate (7i)

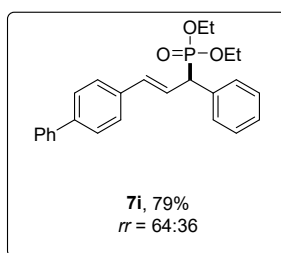

Following the **general procedure 4** on 0.2 mmol scale, yellow oil, yield: 79% (64.2 mg),  $R_f = 0.3$  (silica gel, PE: EA = 1:1, v/v), column chromatography (silica gel, PE: EA = 3:1, v/v).

**$^1\text{H NMR}$**  (500 MHz, Chloroform- $d$ )  $\delta$  7.67 – 7.60 (m, 3H), 7.60 – 7.55 (m, 2H), 7.54 – 7.41 (m, 5H), 7.41 – 7.31 (m, 3H), 7.31 – 7.24 (m, 1H), 6.71 – 6.56 (m, 2H), 4.15 (dddd,  $J = 12.3, 10.2, 6.2, 2.6$  Hz, 2H), 4.12 – 3.97 (m, 2H), 3.97 – 3.82 (m, 1H), 1.32 (td,  $J = 7.0, 2.9$  Hz, 3H), 1.19 (dt,  $J = 14.1, 7.0$  Hz, 3H).

**$^{13}\text{C NMR}$**  (126 MHz, Chloroform- $d$ )  $\delta$  140.7 (d,  $J = 2.6$  Hz), 140.5, 140.2 (d,  $J = 3.1$  Hz), 136.8 (d,  $J = 2.7$  Hz), 136.0 (d,  $J = 7.3$  Hz), 135.8 (d,  $J = 2.8$  Hz), 135.1 (d,  $J = 7.6$  Hz), 133.9 (d,  $J = 13.8$  Hz), 133.3 (d,  $J = 13.9$  Hz), 129.5 (d,  $J = 7.0$  Hz), 129.1 (d,  $J = 7.1$  Hz), 128.8 (d,  $J = 2.3$  Hz), 128.6, 127.8, 127.42 (d,  $J = 2.4$  Hz), 127.37, 127.3, 127.1, 126.9 (d,  $J = 1.7$  Hz), 126.5 (d,  $J = 1.8$  Hz), 124.8 (d,  $J = 9.6$  Hz), 124.5 (d,  $J = 9.5$  Hz), 62.8 (t,  $J = 7.7$  Hz), 49.3 (dd,  $J = 137.2, 52.8$  Hz), 16.5 (dd,  $J = 21.3, 5.8$  Hz).

**$^{31}\text{P NMR}$**  (202 MHz, Chloroform- $d$ )  $\delta$  24.79 (d,  $J = 9.8$  Hz).

**HRMS (ESI) m/z:**  $[\text{M}+\text{H}]^+$  Calcd. for  $\text{C}_{25}\text{H}_{28}\text{O}_3\text{P}^+$  407.1771.; Found: 407.1770.

### diethyl ((2E,4E)-1,5-diphenylpenta-2,4-dien-1-yl)phosphonate (7j)

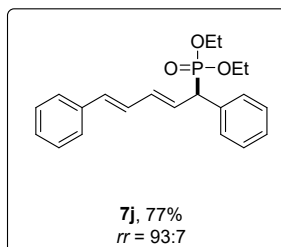

Following the **general procedure 4** on 0.2 mmol scale, yellow oil, yield: 77% (54.8 mg),  $R_f = 0.3$  (silica gel, PE: EA = 1:1, v/v), column chromatography (silica gel, PE: EA = 3:1, v/v).

**$^1\text{H NMR}$**  (500 MHz, Chloroform- $d$ )  $\delta$  7.45 – 7.39 (m, 2H), 7.39 – 7.33 (m, 4H), 7.32 – 7.26 (m, 3H), 7.24 – 7.19 (m, 1H), 6.80 (ddt,  $J = 15.6, 10.3, 1.0$  Hz, 1H), 6.50 (dd,  $J = 15.7, 2.2$  Hz, 1H), 6.43 – 6.31 (m, 1H), 6.15 (dt,  $J = 15.0, 8.7$  Hz, 1H), 4.09 (dq,  $J = 8.0, 7.0$  Hz, 2H), 4.01 – 3.87 (m, 2H), 3.86 – 3.74 (m, 1H), 1.28 (t,  $J = 7.1$  Hz, 3H), 1.12 (t,  $J = 7.1$  Hz, 3H).

**$^{13}\text{C NMR}$**  (126 MHz, Chloroform- $d$ )  $\delta$  137.1 (d,  $J = 1.7$  Hz), 135.9 (d,  $J = 7.5$  Hz), 134.1 (d,  $J = 14.0$  Hz), 132.6 (d,  $J = 3.9$  Hz), 129.1 (d,  $J = 6.9$  Hz), 128.8, 128.7 (d,  $J = 2.6$  Hz), 128.64, 128.59, 128.5, 128.4, 128.3 (d,  $J = 4.3$  Hz), 128.2, 127.6, 127.3 (d,  $J = 2.9$  Hz), 126.7 (d,  $J = 13.1$  Hz), 126.4, 62.8 (dd,  $J = 26.0, 7.2$  Hz), 62.0 (d,  $J = 5.4$  Hz), 49.8, 48.8, 16.4 (dd,  $J = 24.4, 5.9$  Hz).

**$^{31}\text{P NMR}$**  (202 MHz, Chloroform- $d$ )  $\delta$  24.71, 24.62, 18.70.

**HRMS (ESI) m/z:**  $[\text{M}+\text{H}]^+$  Calcd. for  $\text{C}_{21}\text{H}_{26}\text{O}_3\text{P}^+$  357.1614.; Found: 357.1609.

### 1-(difluoromethyl)-1H-benzo[d]imidazole

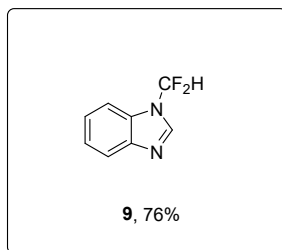

**<sup>1</sup>H NMR** (500 MHz, Chloroform-d)  $\delta$  8.14 (s, 1H), 7.94 – 7.80 (m, 1H), 7.72 – 7.57 (m, 1H), 7.49 – 7.21 (m, 3H).

**<sup>19</sup>F NMR** (471 MHz, Chloroform-d)  $\delta$  -93.71.

**HRMS (ESI) m/z:** [M+H]<sup>+</sup> Calcd. for C<sub>21</sub>H<sub>26</sub>O<sub>3</sub>P<sup>+</sup> 169.0572.; Found: 169.0576.

**N,N-dimethyl-4-phenylbut-3-yn-2-amine (12)**

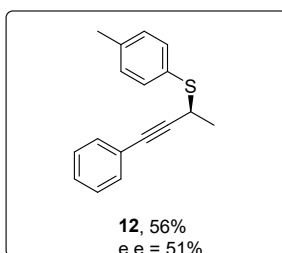

Following the **general procedure 6** on 0.2 mmol scale, yellow oil, yield: 87% (28.2 mg), R<sub>f</sub> = 0.7 (silica gel, PE: DCM = 10:1, v/v), column chromatography (silica gel, PE: DCM = 100:1, v/v).

**HPLC** analysis: The enantiomeric purity was determined by HPLC analysis (Daicel Chiralcel AD-H, hexane, 0.5 mL/min,  $\lambda$  = 254 nm,  $\tau_R$ (major) = 19.8 min and  $\tau_R$ (minor) = 21.5 min.

**<sup>1</sup>H NMR** (500 MHz, Chloroform-d)  $\delta$  7.50 (d, J = 7.7 Hz, 2H), 7.38 – 7.34 (m, 2H), 7.28 (dd, J = 4.8, 2.1 Hz, 3H), 7.16 (d, J = 7.7 Hz, 2H), 4.06 (q, J = 7.0 Hz, 1H), 2.36 (s, 3H), 1.59 (d, J = 6.8 Hz, 3H).

**<sup>13</sup>C NMR** (126 MHz, Chloroform-d)  $\delta$  138.30, 134.25, 131.62, 129.88, 129.59, 128.20, 128.05, 123.15, 90.33, 83.68, 34.56, 21.86, 21.24.

**HRMS (ESI) m/z:** [M+H]<sup>+</sup> Calcd. for C<sub>17</sub>H<sub>17</sub>S<sup>+</sup> 253.1045.; Found: 253.1048.

## 2.4 NMR spectroscopic data

### (E)-N,N-dimethyl-1,3-diphenylprop-2-en-1-amine

<sup>1</sup>H NMR (500 MHz, Chloroform-d)

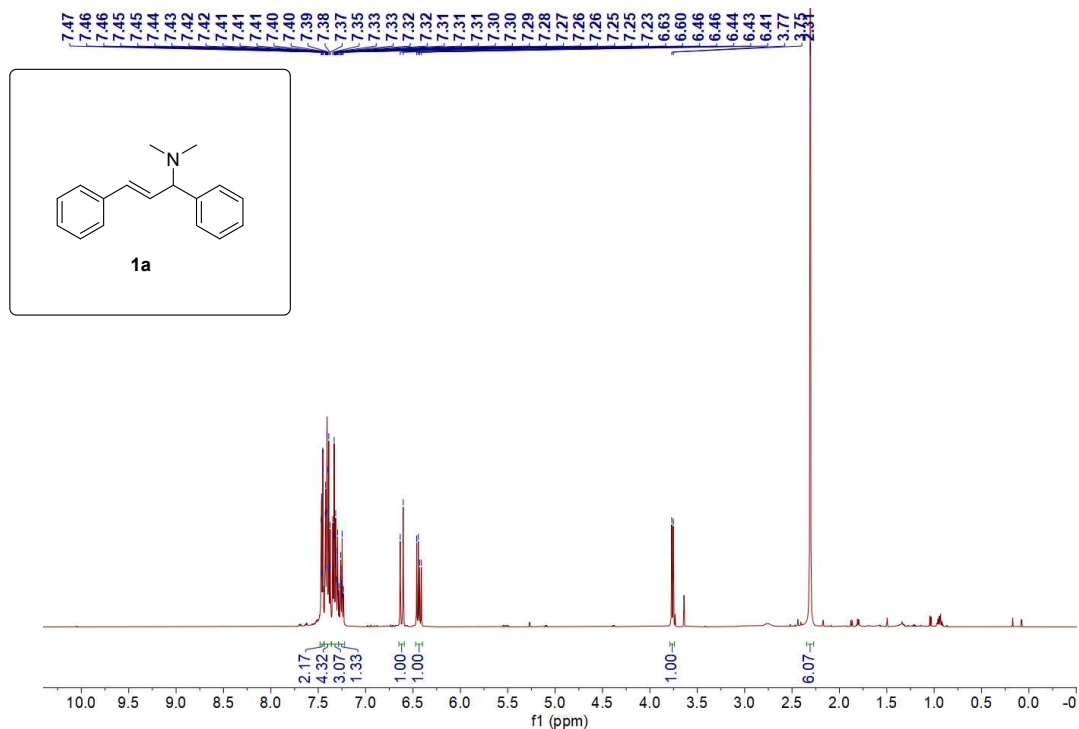

### (E)-1,3-bis(4-fluorophenyl)-N,N-dimethylprop-2-en-1-amine

<sup>1</sup>H NMR (500 MHz, Chloroform-d)

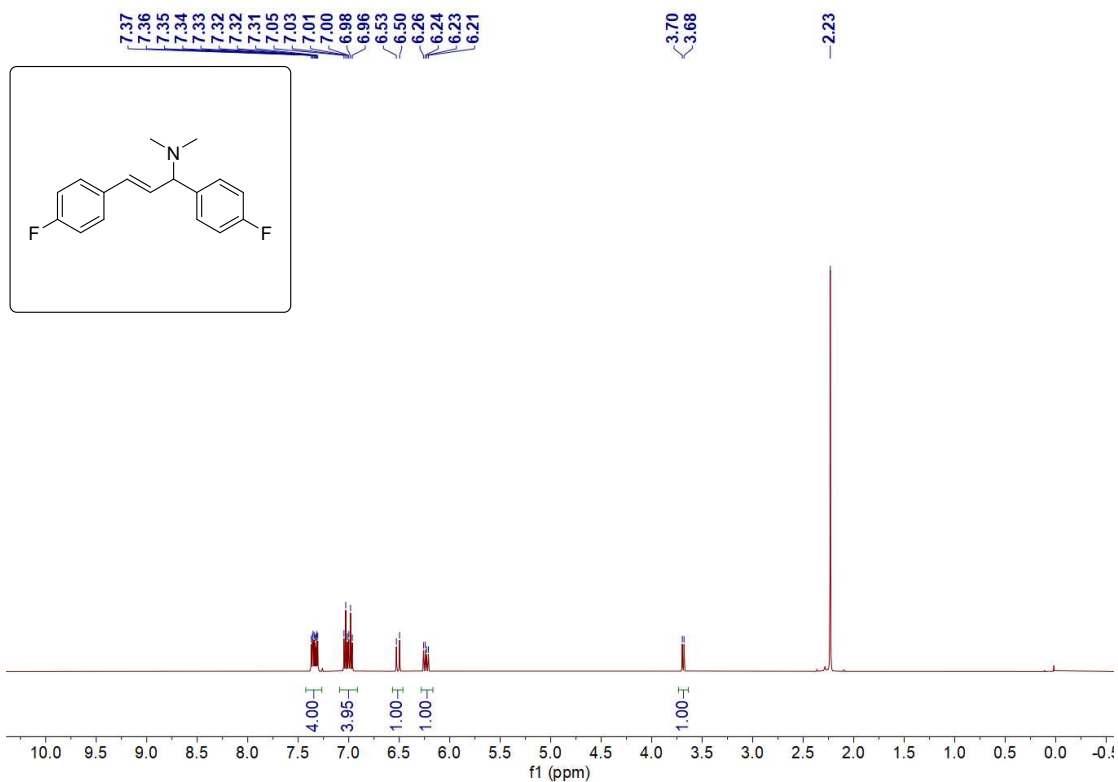

**(E)-1,3-bis(4-chlorophenyl)-N,N-dimethylprop-2-en-1-amine**

<sup>1</sup>H NMR (500 MHz, Chloroform-d)

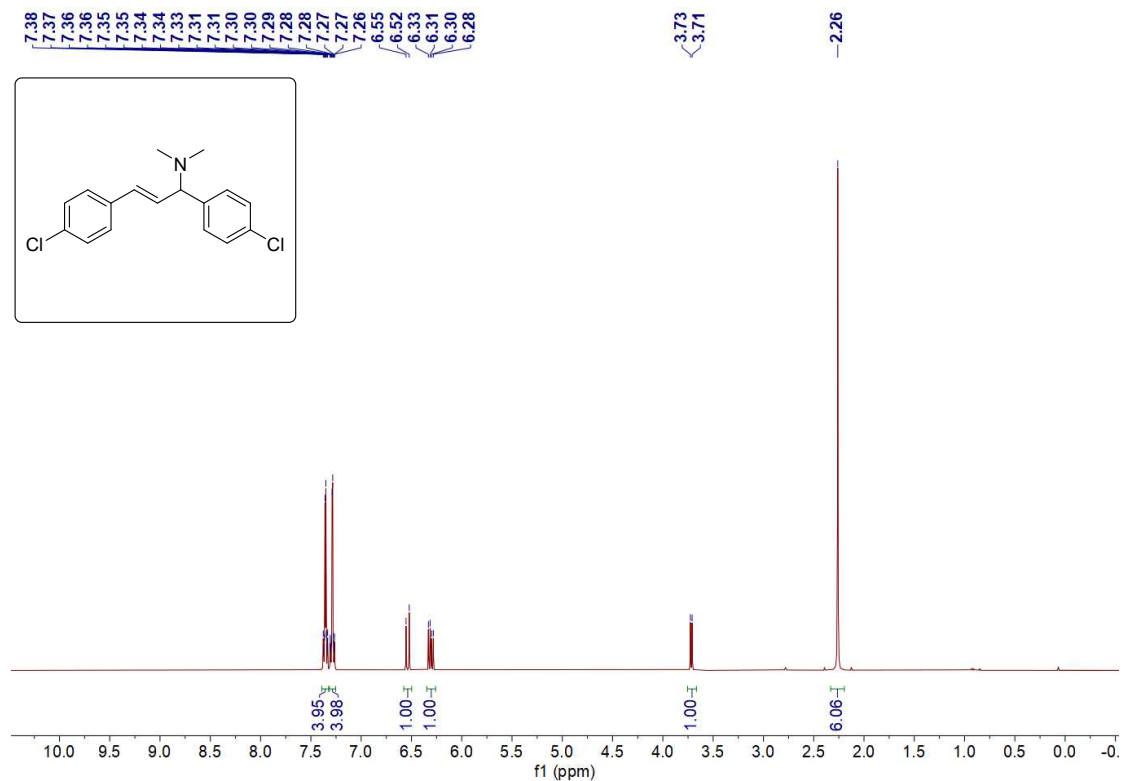

**(E)-1,3-bis(4-bromophenyl)-N,N-dimethylprop-2-en-1-amine**

<sup>1</sup>H NMR (500 MHz, Chloroform-d)

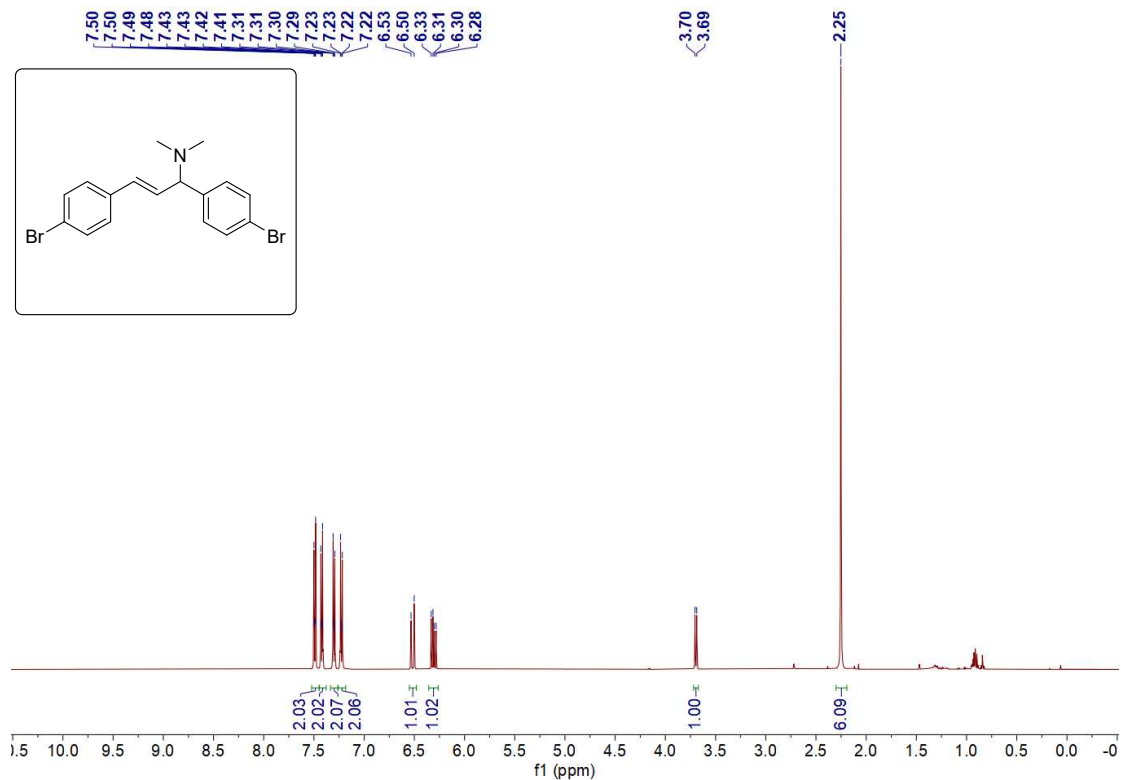

**(E)-1,3-bis(4-iodophenyl)-N,N-dimethylprop-2-en-1-amine**

<sup>1</sup>H NMR (500 MHz, Chloroform-d)

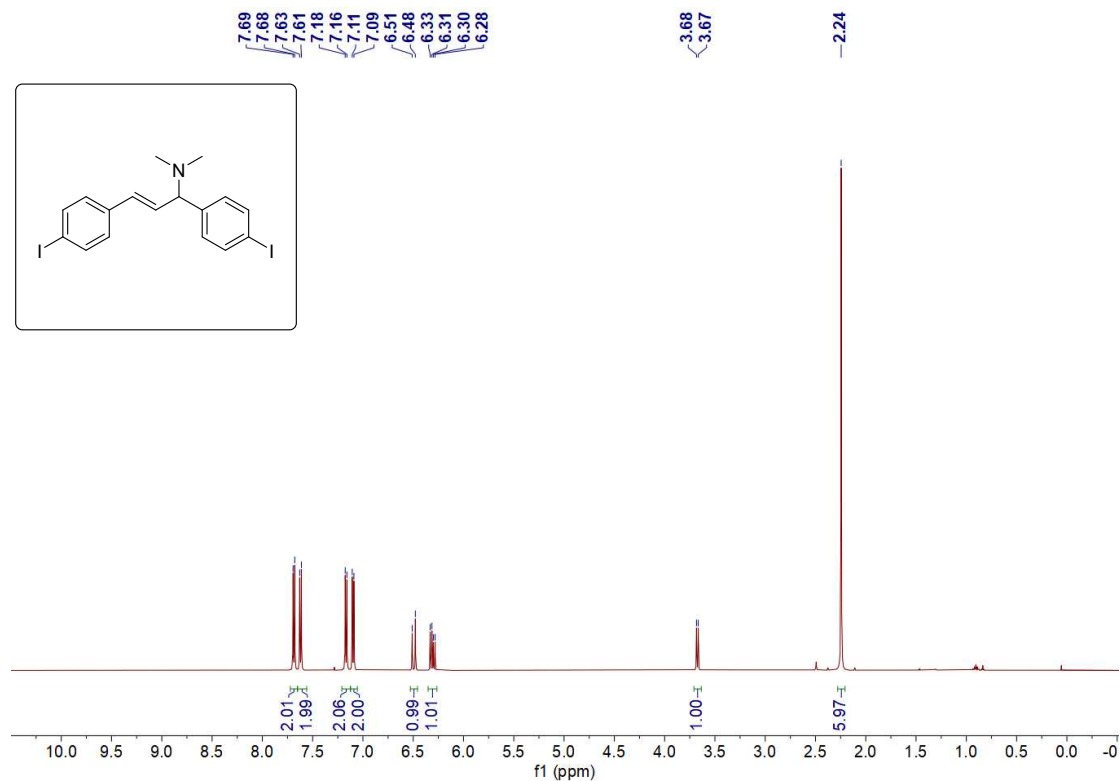

**(E)-3-(4-ethylphenyl)-N,N-dimethyl-1-phenylprop-2-en-1-amine**

<sup>1</sup>H NMR (500 MHz, Chloroform-d)

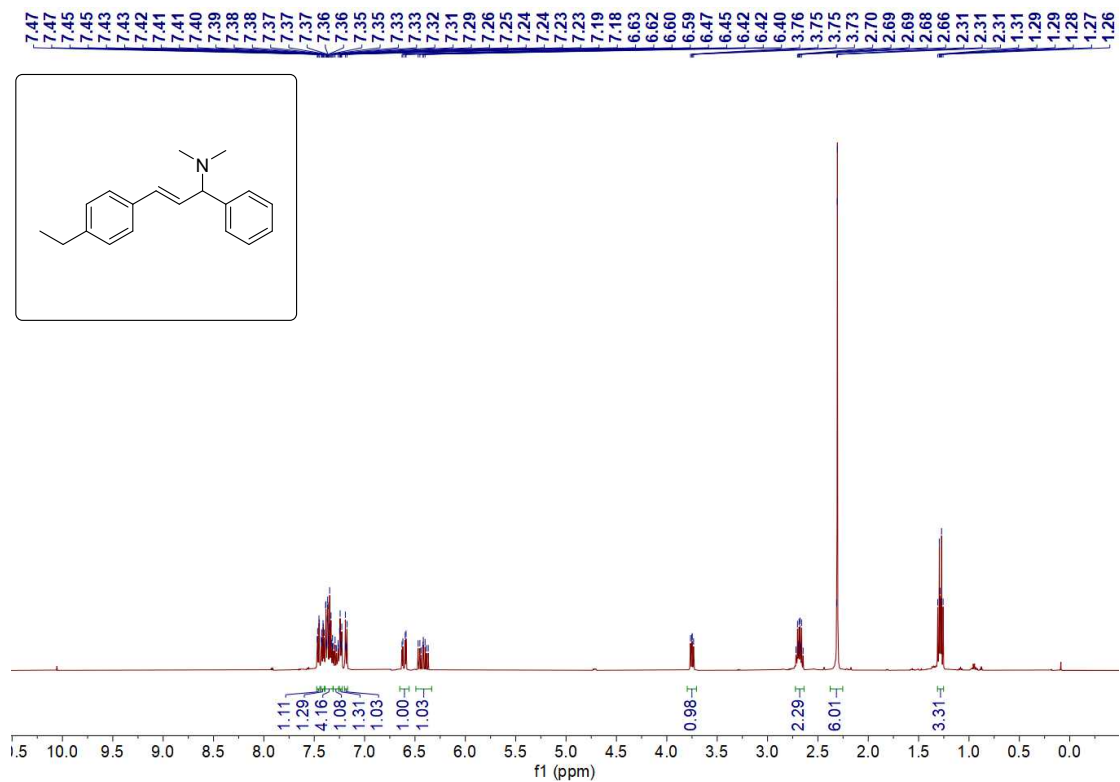



**(E)-3-(4-fluorophenyl)-N,N-dimethyl-1-(p-tolyl)prop-2-en-1-amine**

<sup>1</sup>H NMR (500 MHz, Chloroform-d)

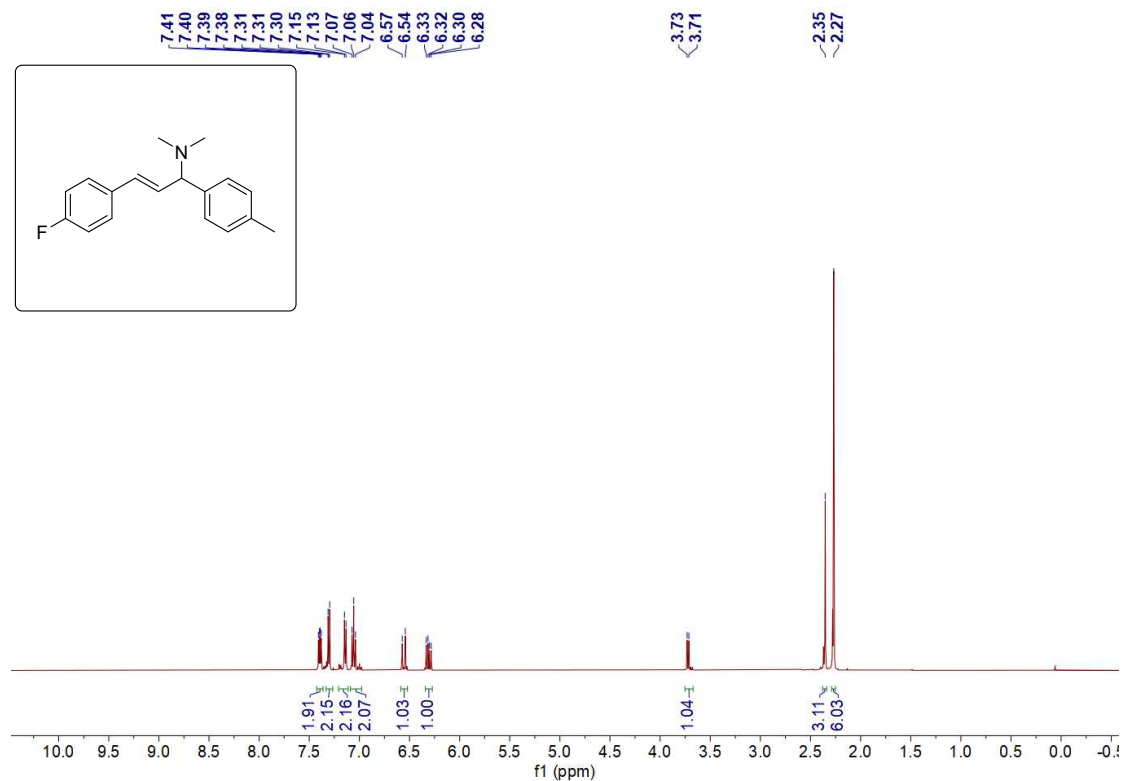

**(2E,4E)-N,N-dimethyl-1,5-diphenylpenta-2,4-dien-1-amine**

<sup>1</sup>H NMR (500 MHz, Chloroform-d)

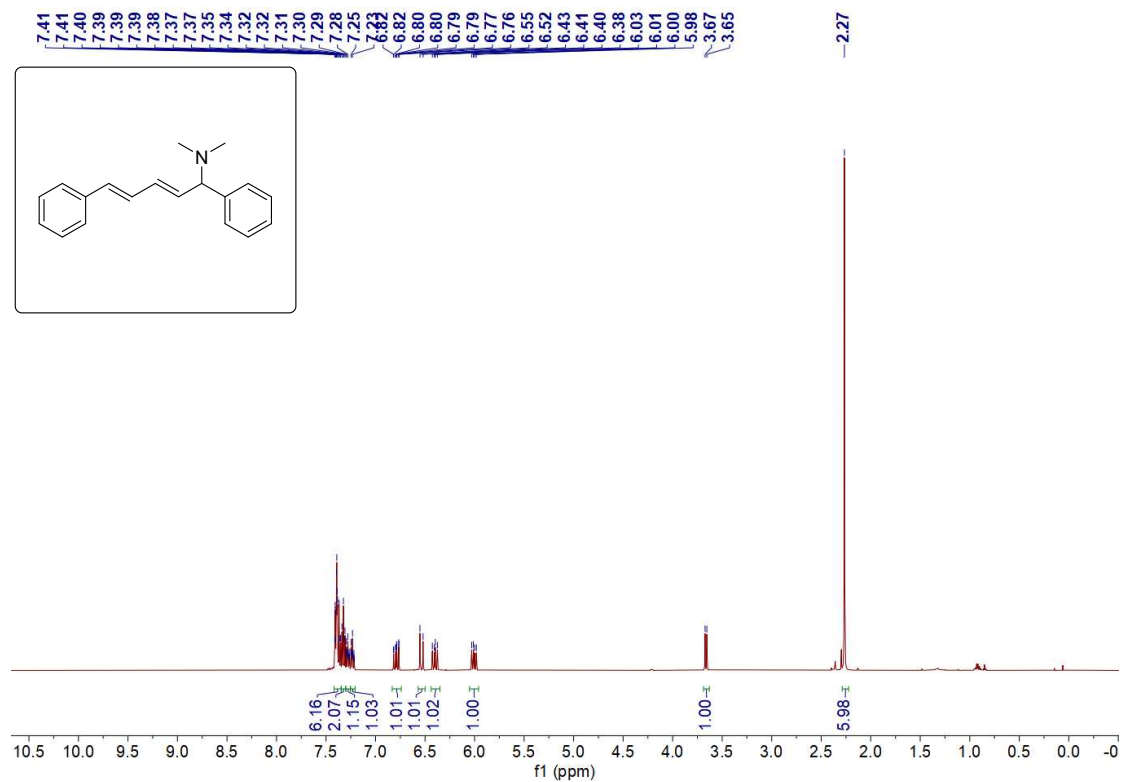

**N,N-dimethyl-4-phenylbut-3-yn-2-amine (1g)**

**<sup>1</sup>H NMR (500 MHz, Chloroform-d)**

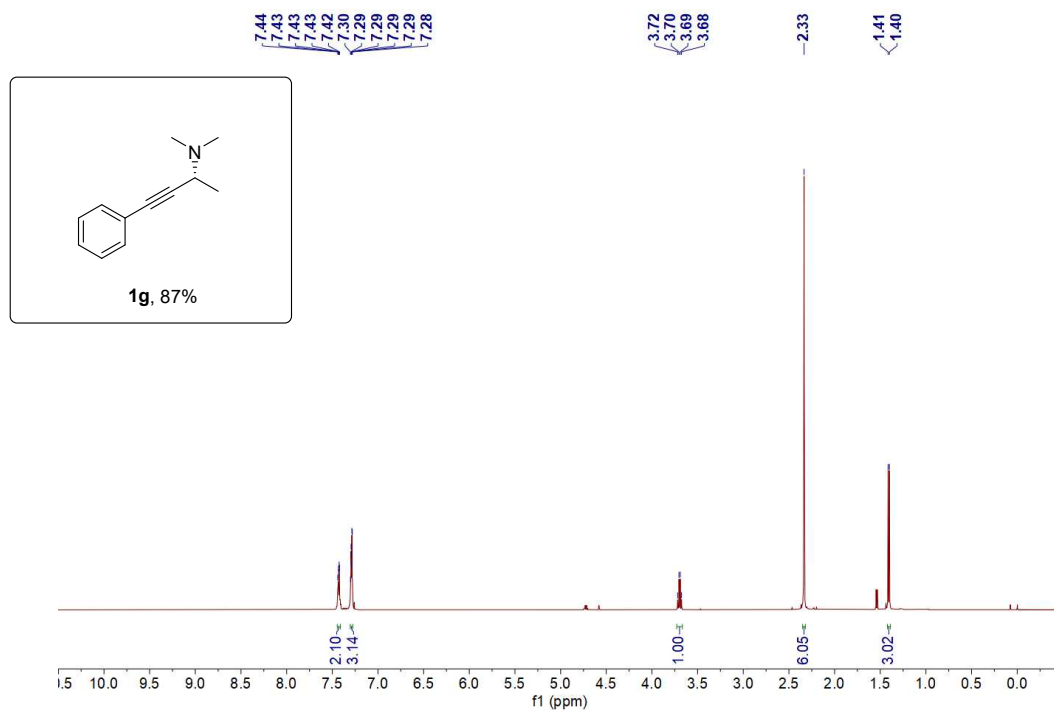

**sodium 4-isopropylbenzenesulfinate**

**<sup>1</sup>H NMR (500 MHz, DMSO-d6)**

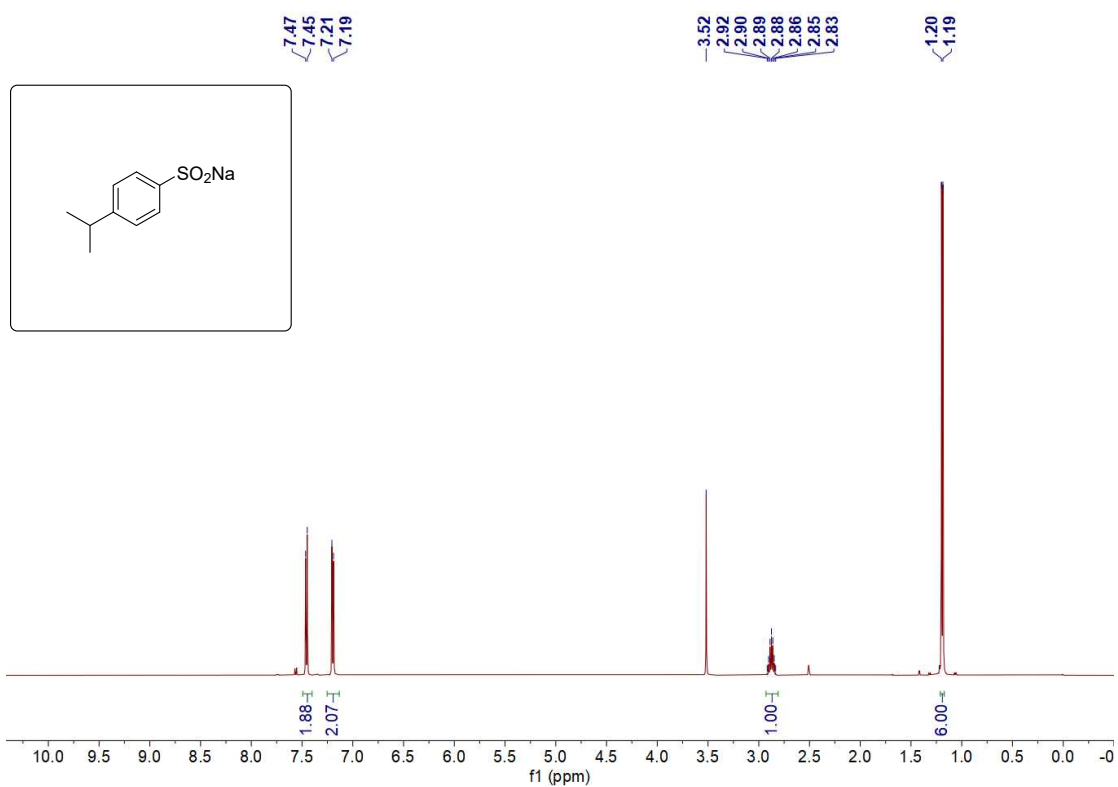

**sodium cyclopropanesulfinate**

**<sup>1</sup>H NMR (500 MHz, DMSO-d6)**

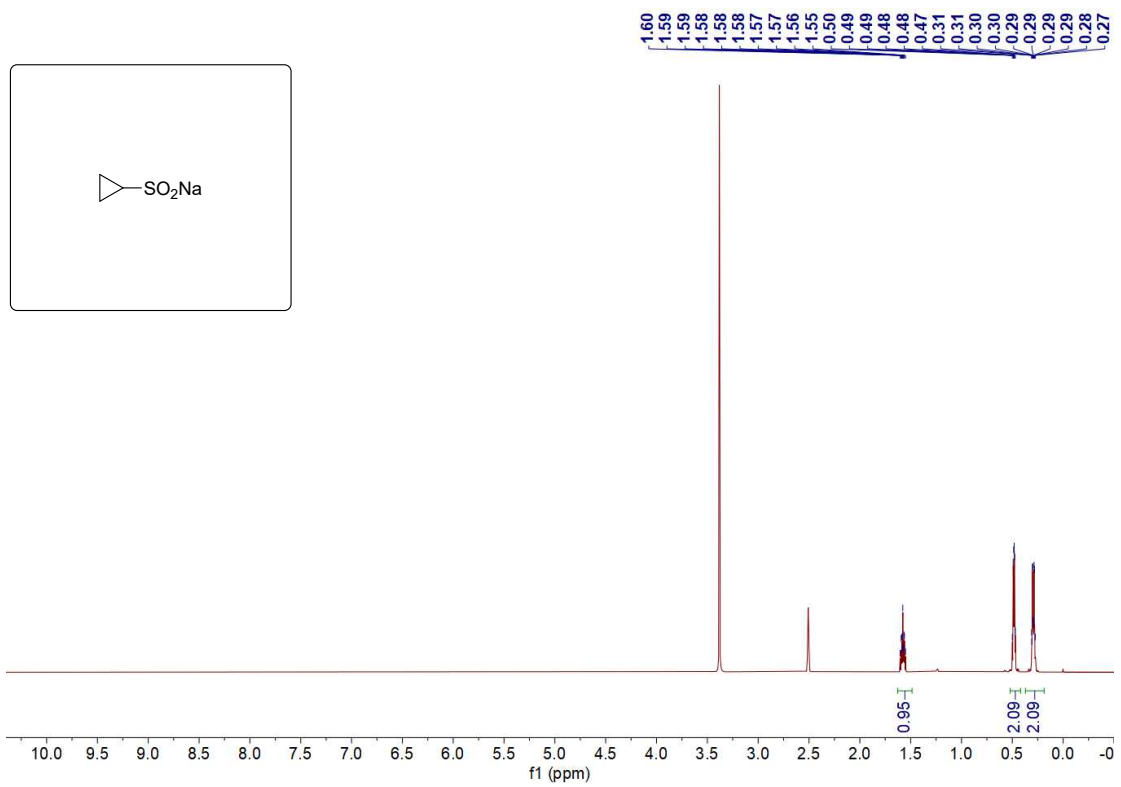

### sodium naphthalene-2-sulfinate

<sup>1</sup>H NMR (500 MHz, DMSO-d<sub>6</sub>)

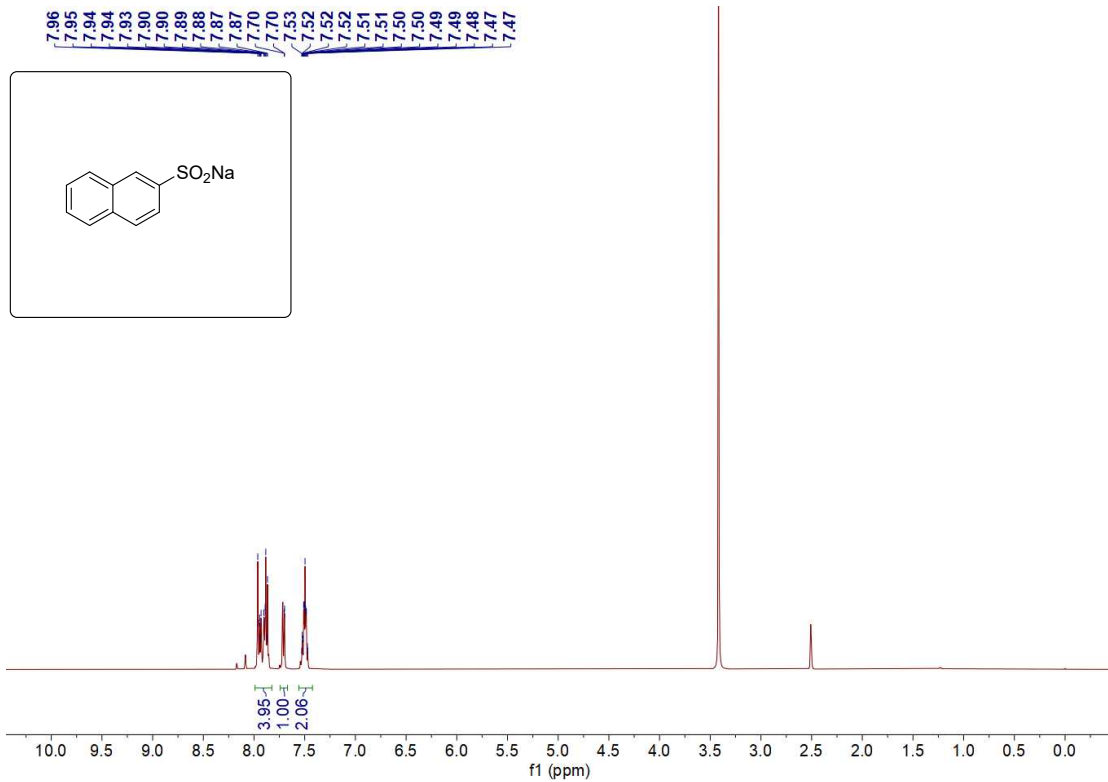

### sodium thiophene-2-sulfinate

<sup>1</sup>H NMR (500 MHz, DMSO-d<sub>6</sub>)

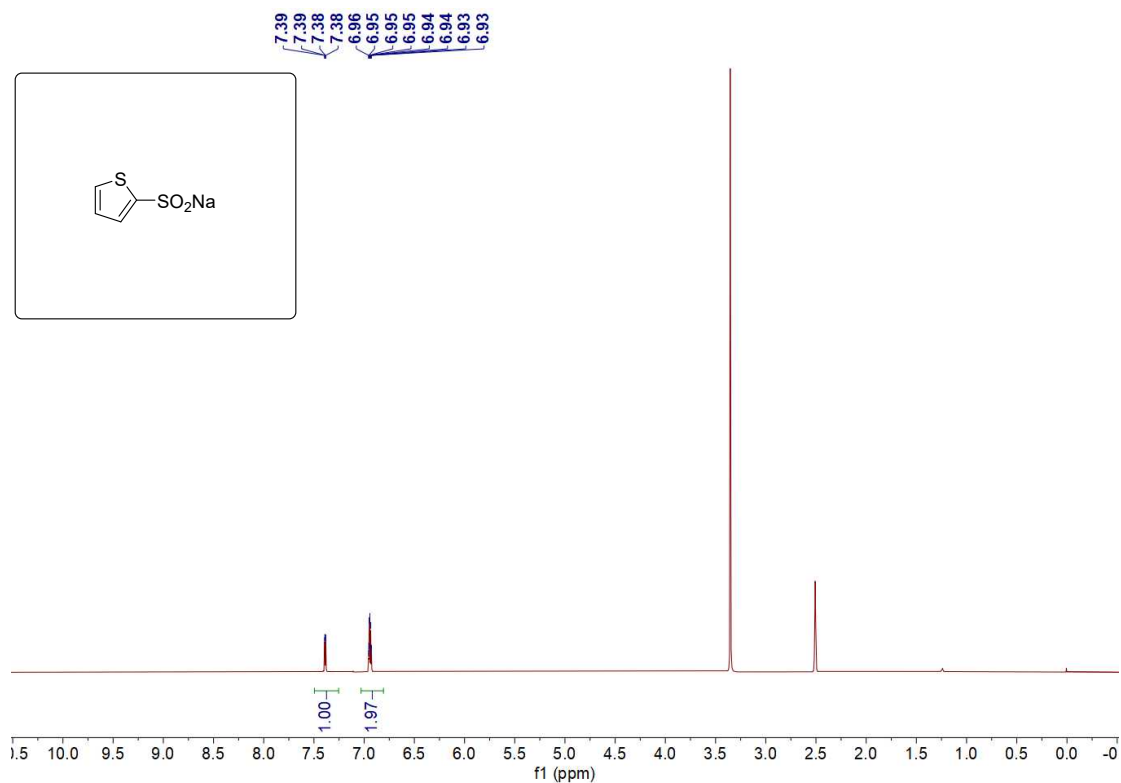

**(E)-(1,3-diphenylallyl)diphenylphosphine oxide (4a)**

<sup>1</sup>H NMR (500 MHz, Chloroform-d)

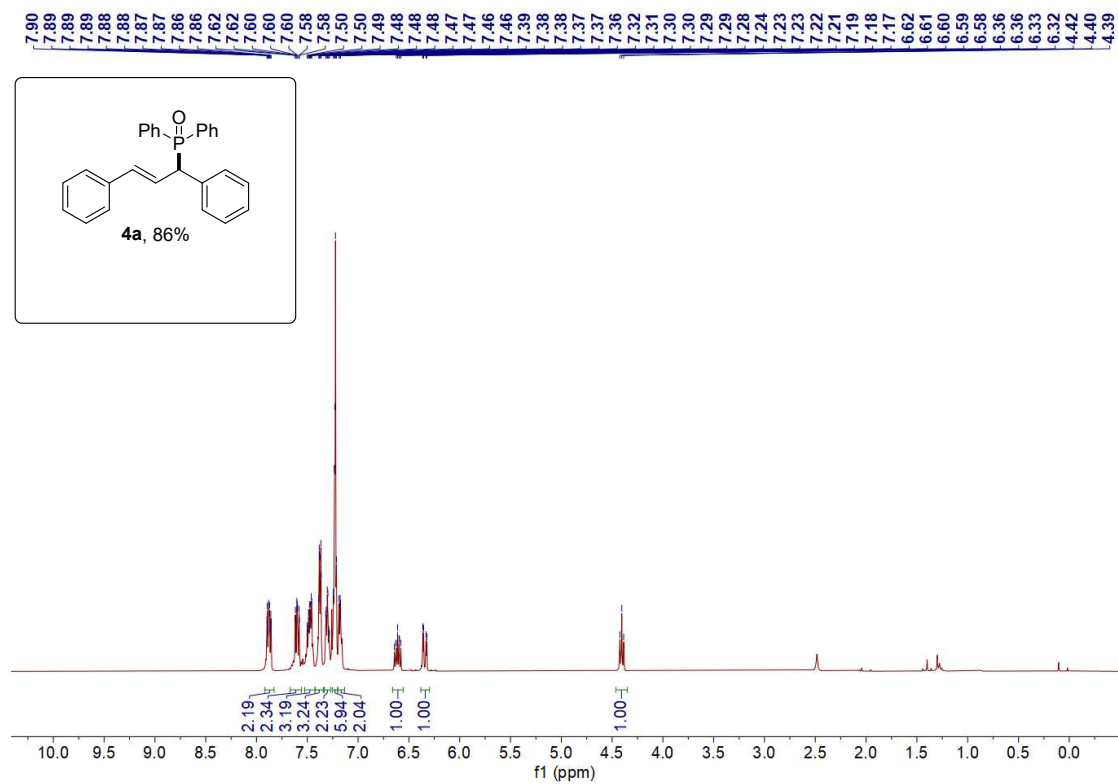

<sup>13</sup>C NMR (126 MHz, Chloroform-d)

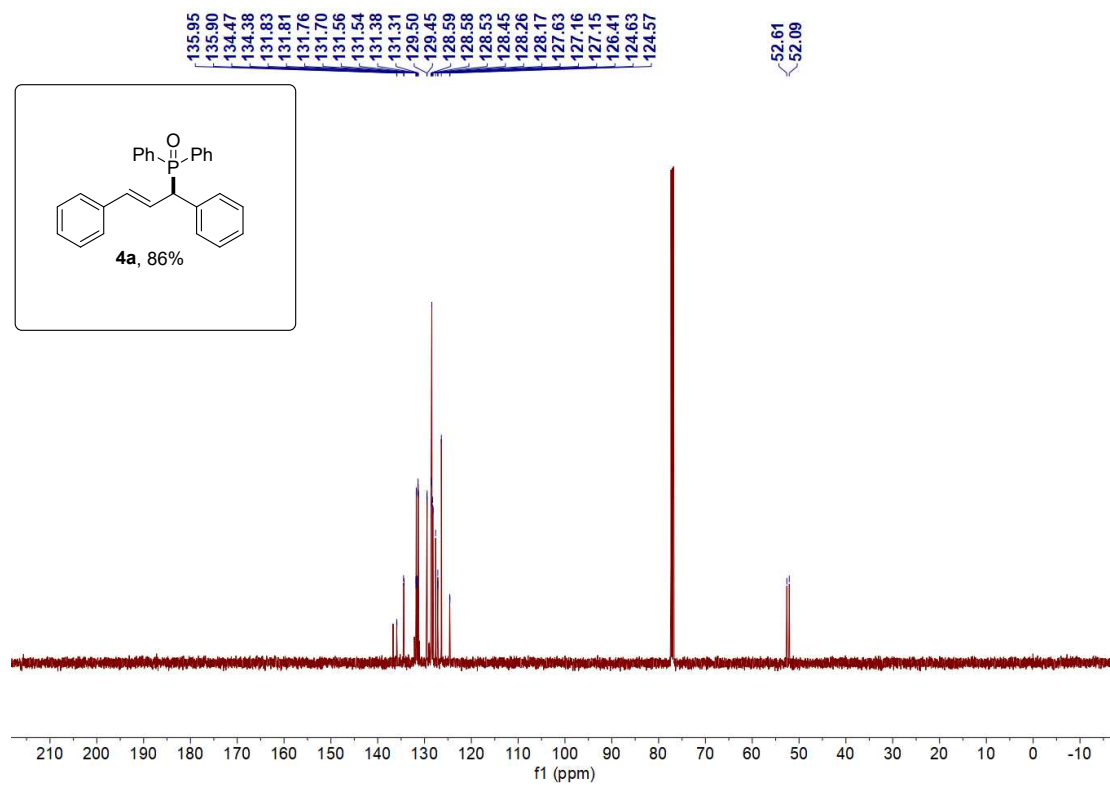

**<sup>31</sup>P NMR (202 MHz, CDCl<sub>3</sub>)**

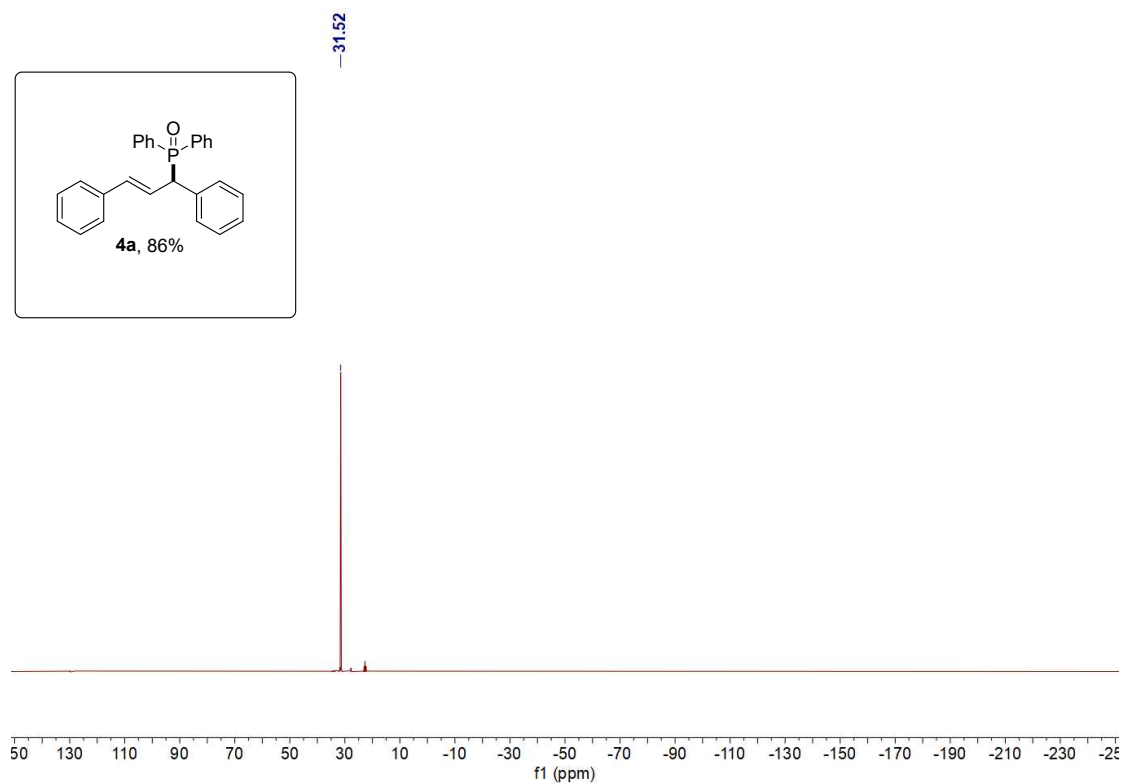

**(E)-(1,3-diphenylallyl)di-p-tolylphosphine oxide (4b)**

<sup>1</sup>H NMR (500 MHz, Chloroform-d)

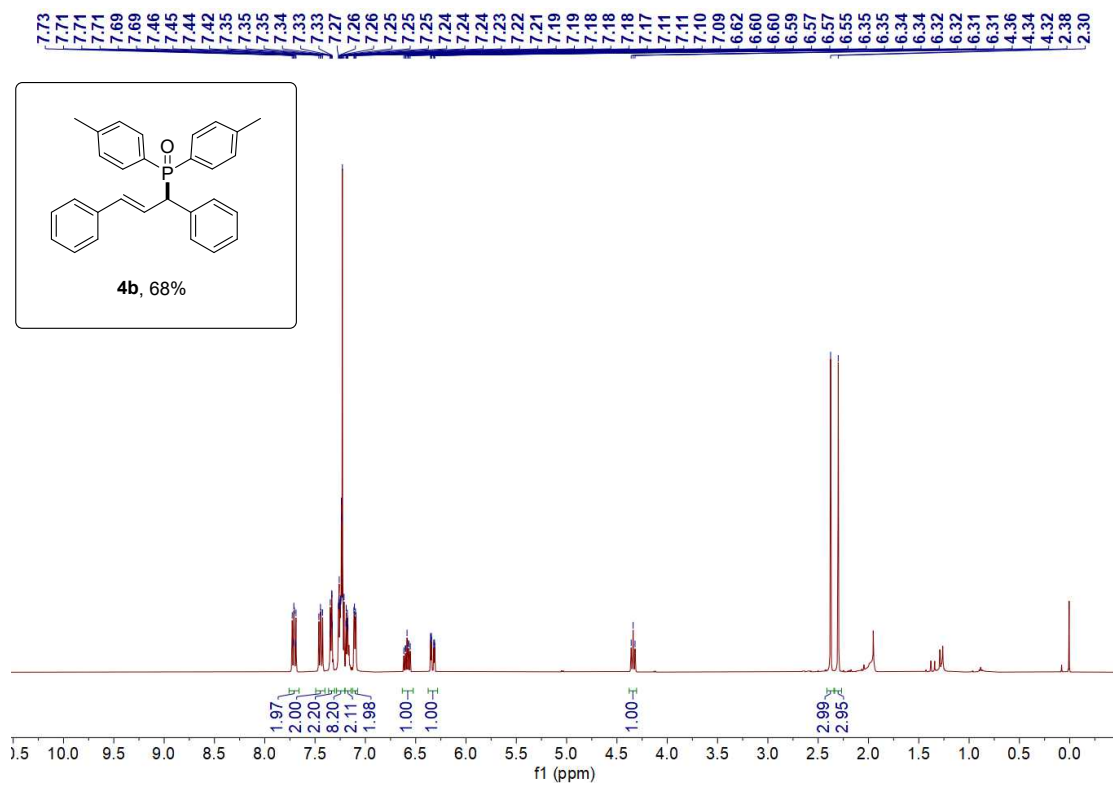

**<sup>13</sup>C NMR (126 MHz, Chloroform-d)**

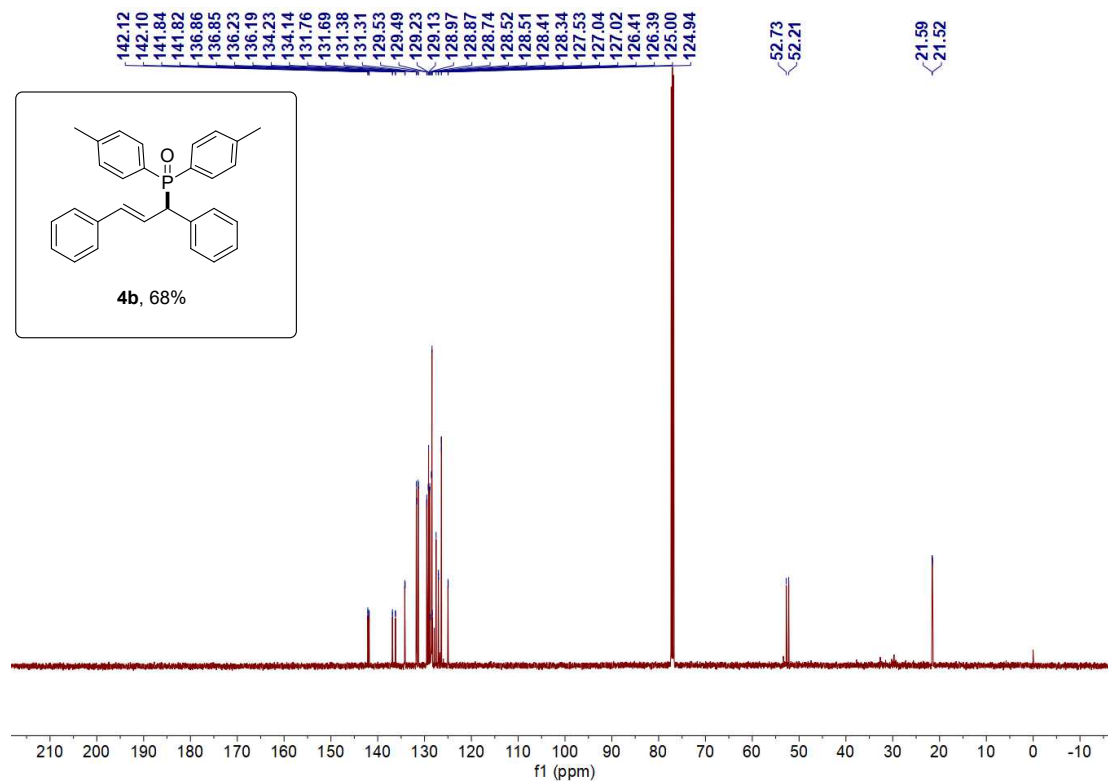

**<sup>31</sup>P NMR (202 MHz, Chloroform-d)**

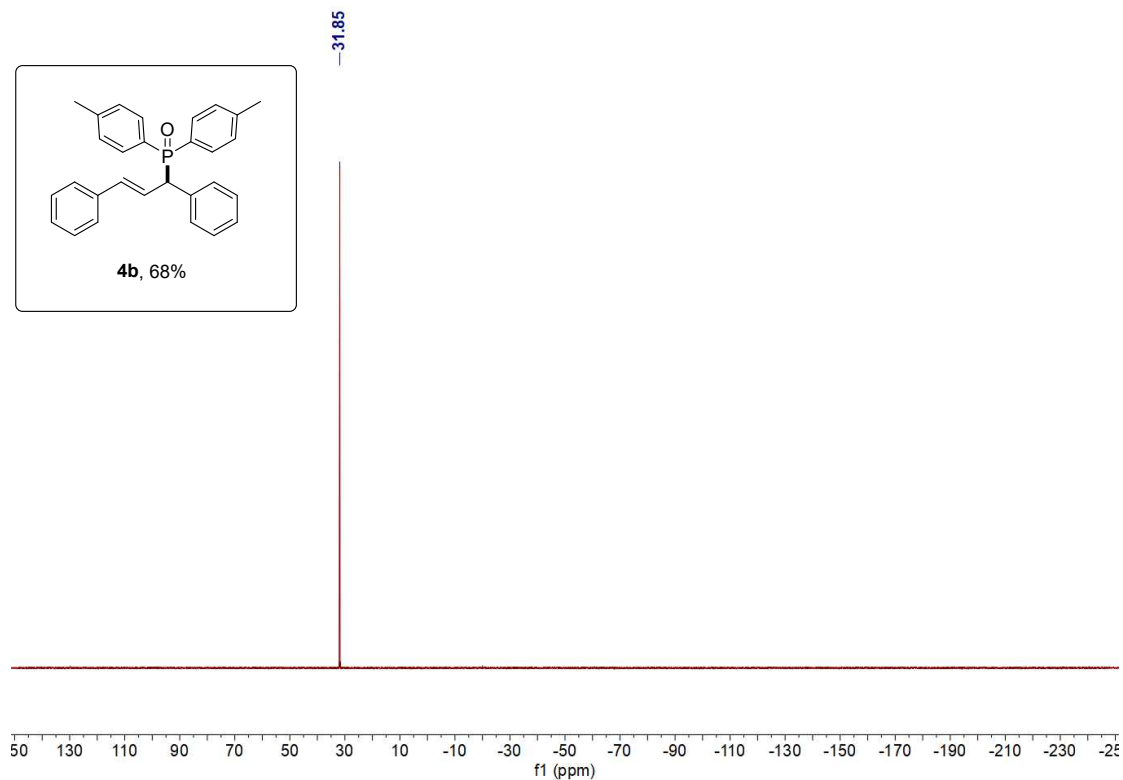

**(E)-bis(3,5-dimethylphenyl)(1,3-diphenylallyl)phosphine oxide (4c)**

**<sup>1</sup>H NMR (500 MHz, Chloroform-d)**

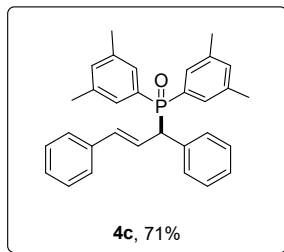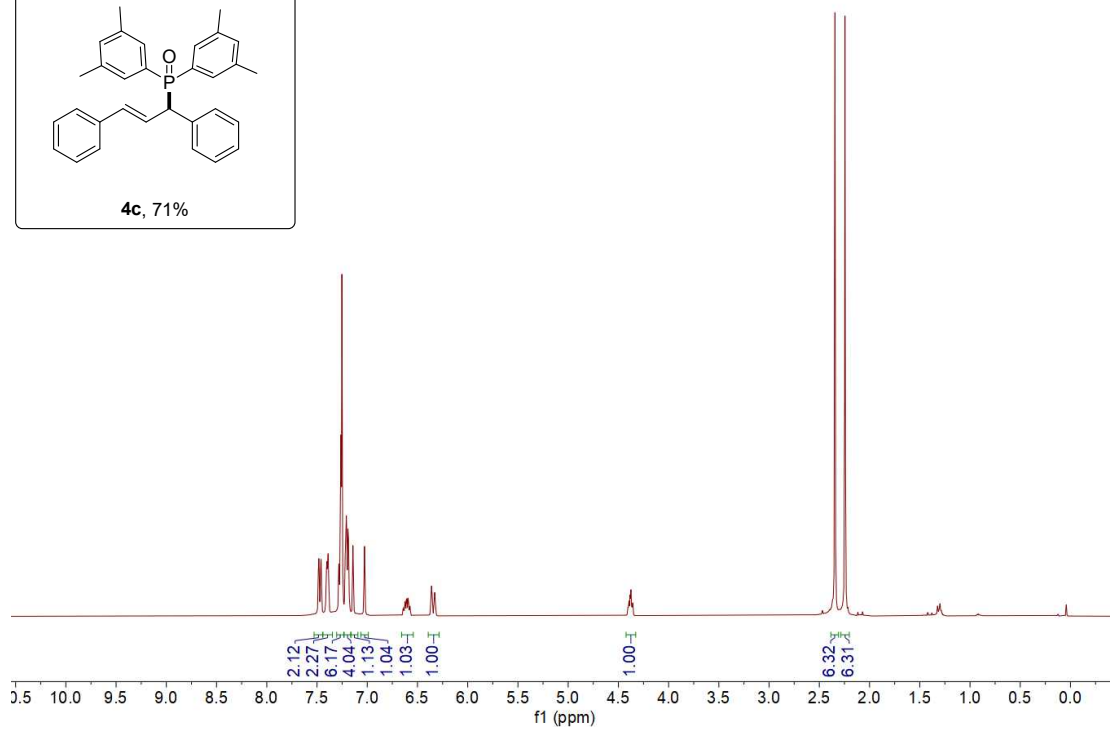

**<sup>13</sup>C NMR (126 MHz, Chloroform-d)**

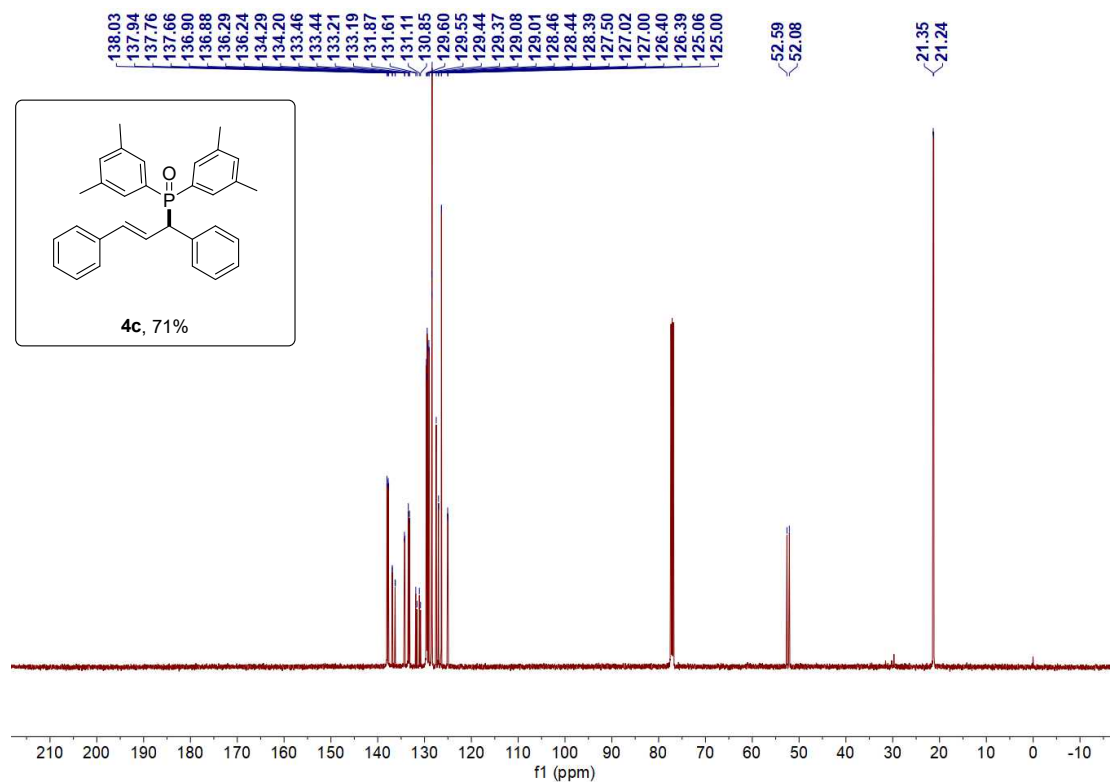



**<sup>31</sup>P NMR (202 MHz, Chloroform-d)**

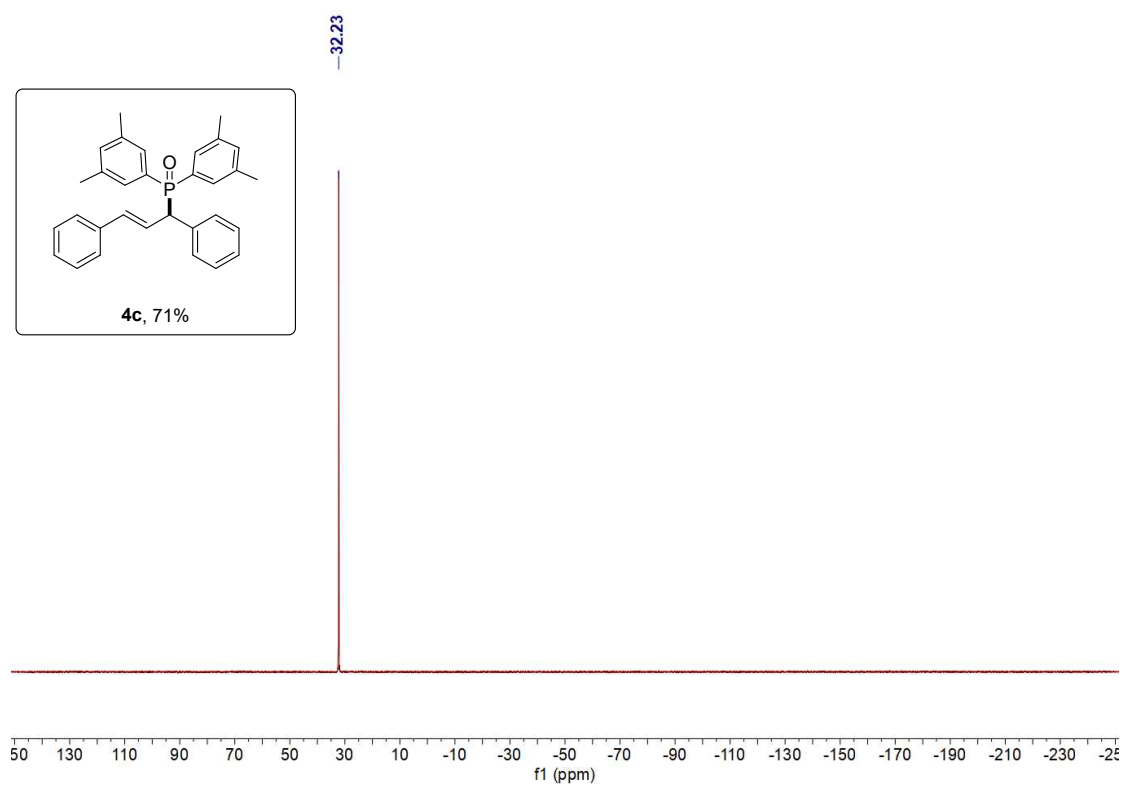

**(E)-(1,3-diphenylallyl)bis(3-methoxyphenyl)phosphine oxide (4d)**

**<sup>1</sup>H NMR (500 MHz, Chloroform-d)**

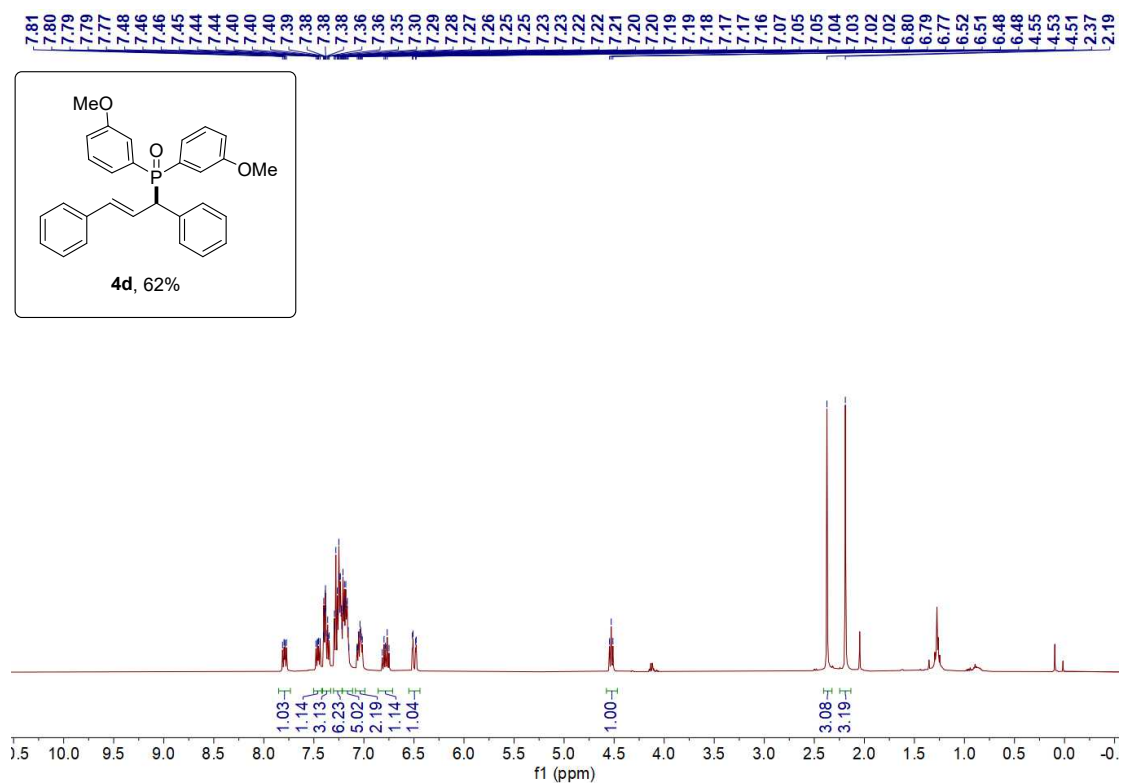

**<sup>13</sup>C NMR (126 MHz, Chloroform-d)**

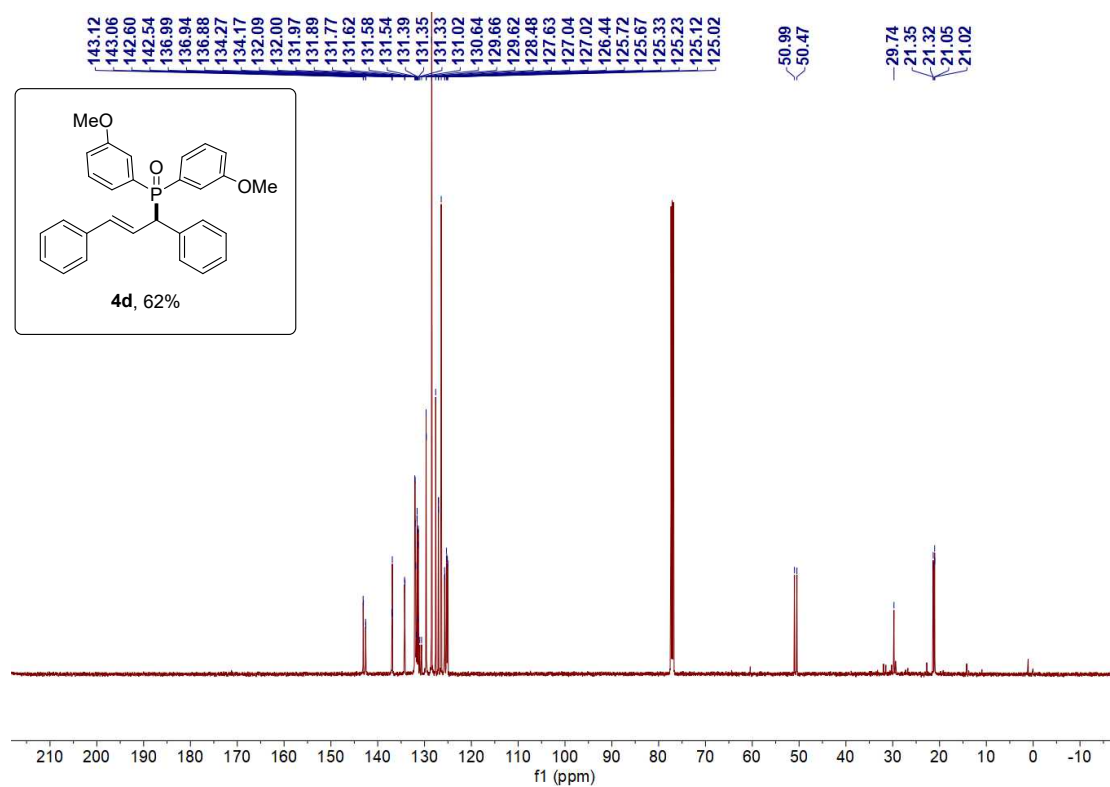

**<sup>31</sup>P NMR (202 MHz, Chloroform-d)**

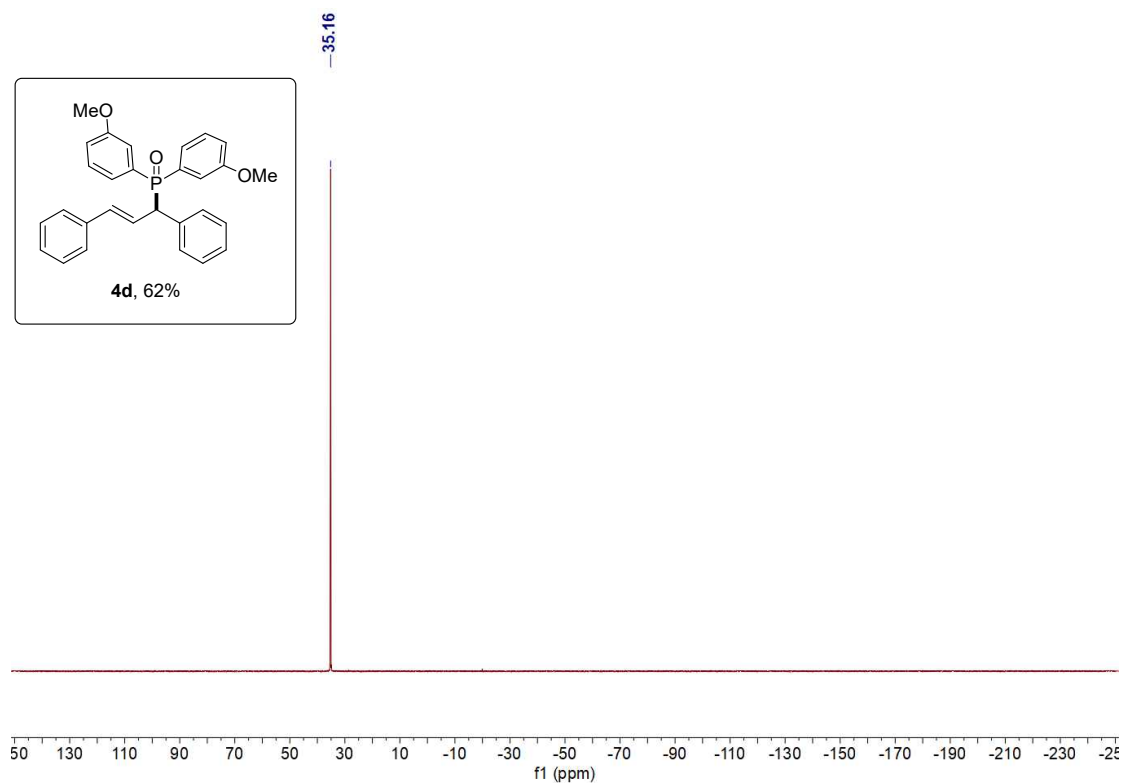

### (E)-(1,3-diphenylallyl)bis(4-fluorophenyl)phosphine oxide (4e)

<sup>1</sup>H NMR (500 MHz, Chloroform-d)

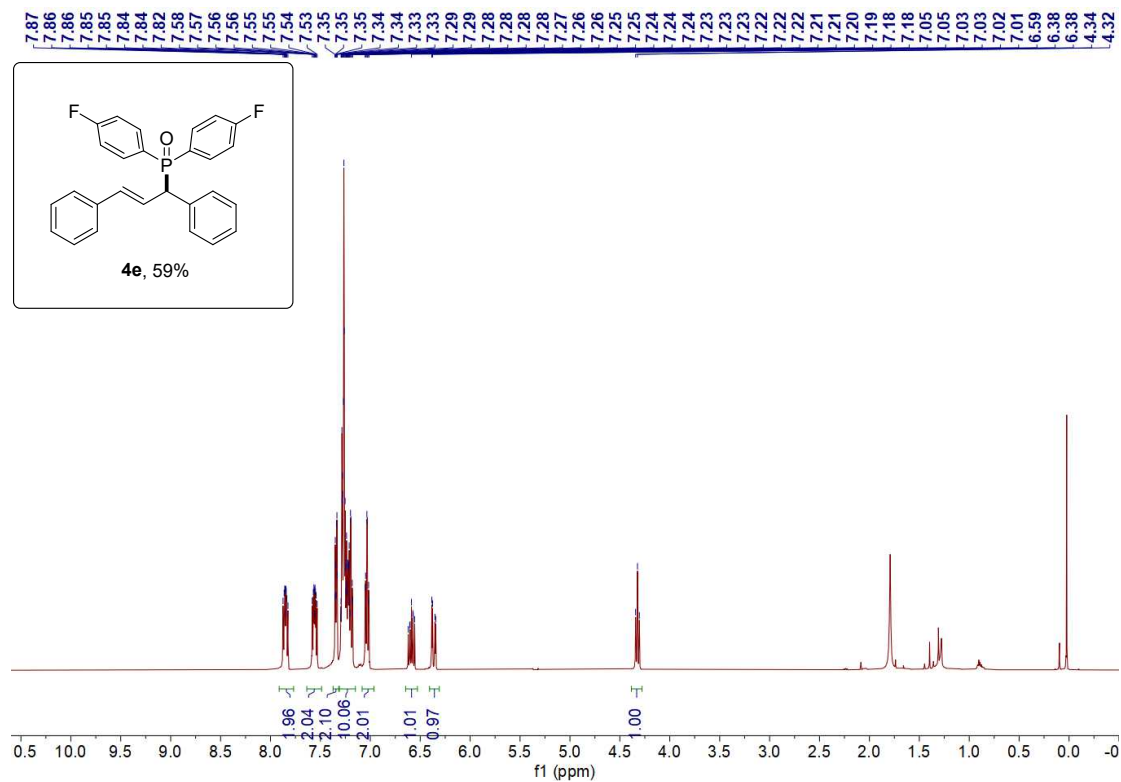

<sup>13</sup>C NMR (126 MHz, Chloroform-d)

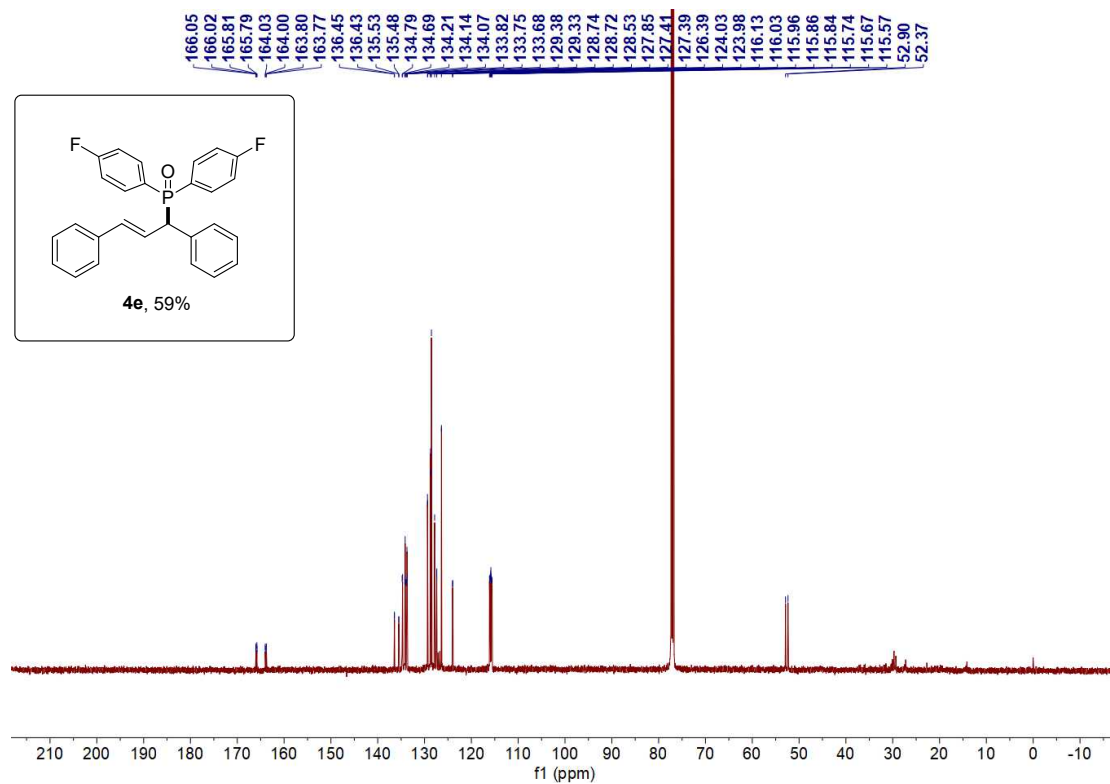

**<sup>31</sup>P NMR (202 MHz, Chloroform-d)**

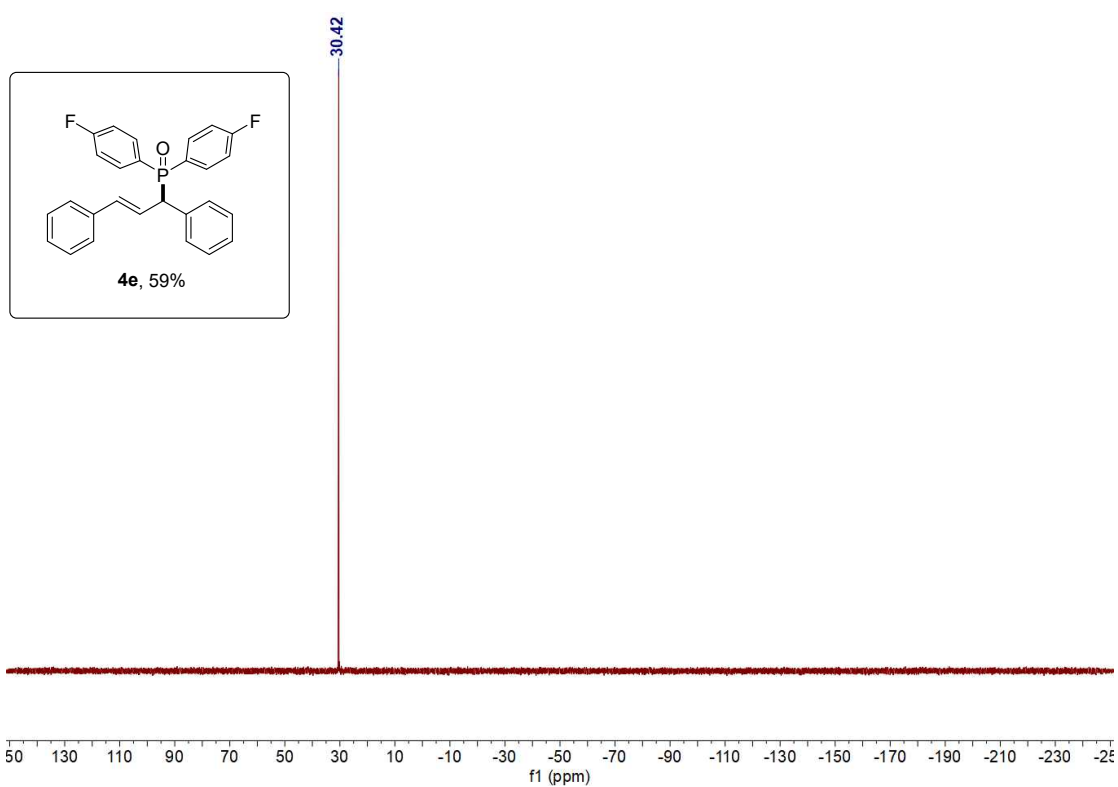

**<sup>19</sup>F NMR (471 MHz, Chloroform-d)**

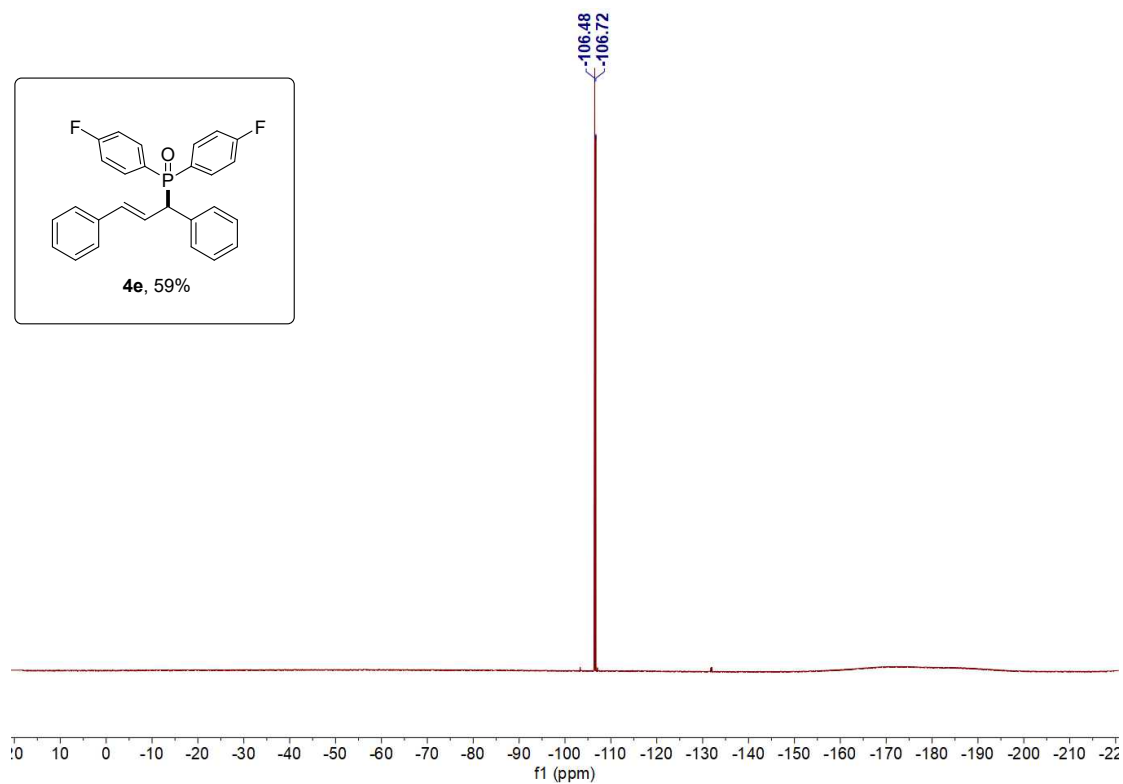

### (E)-bis(3-chlorophenyl)(1,3-diphenylallyl)phosphine oxide (4f)

<sup>1</sup>H NMR (500 MHz, Chloroform-d)

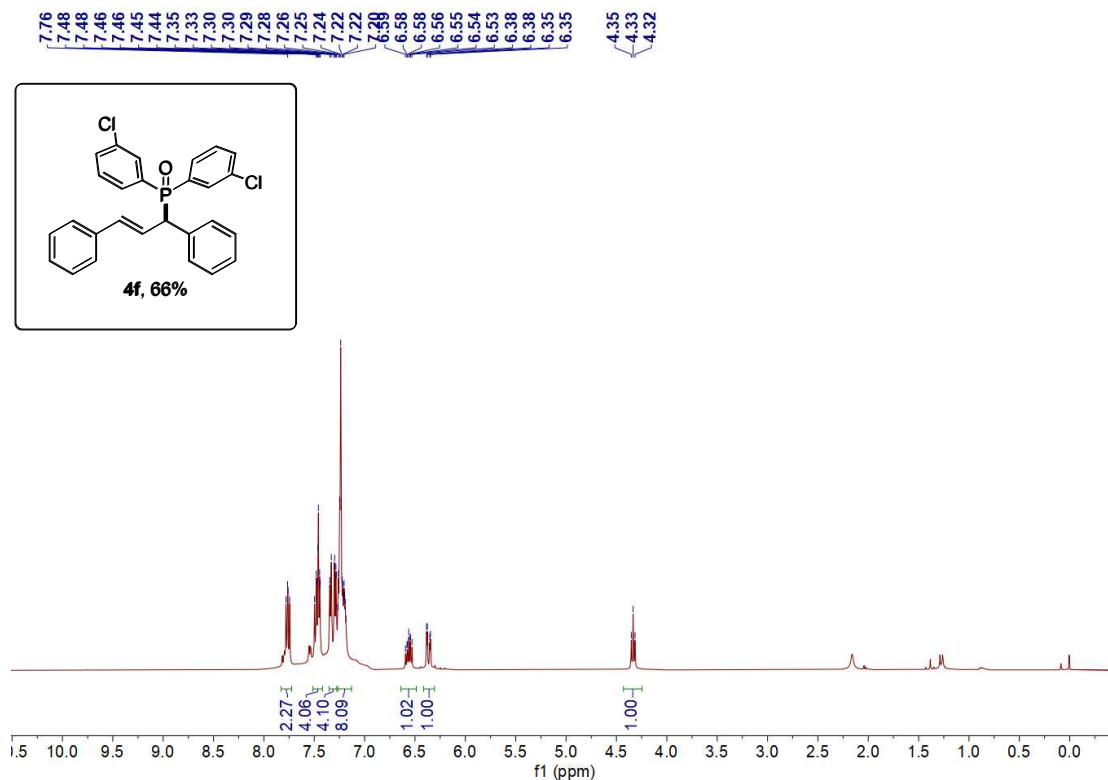

<sup>13</sup>C NMR (126 MHz, Chloroform-d)

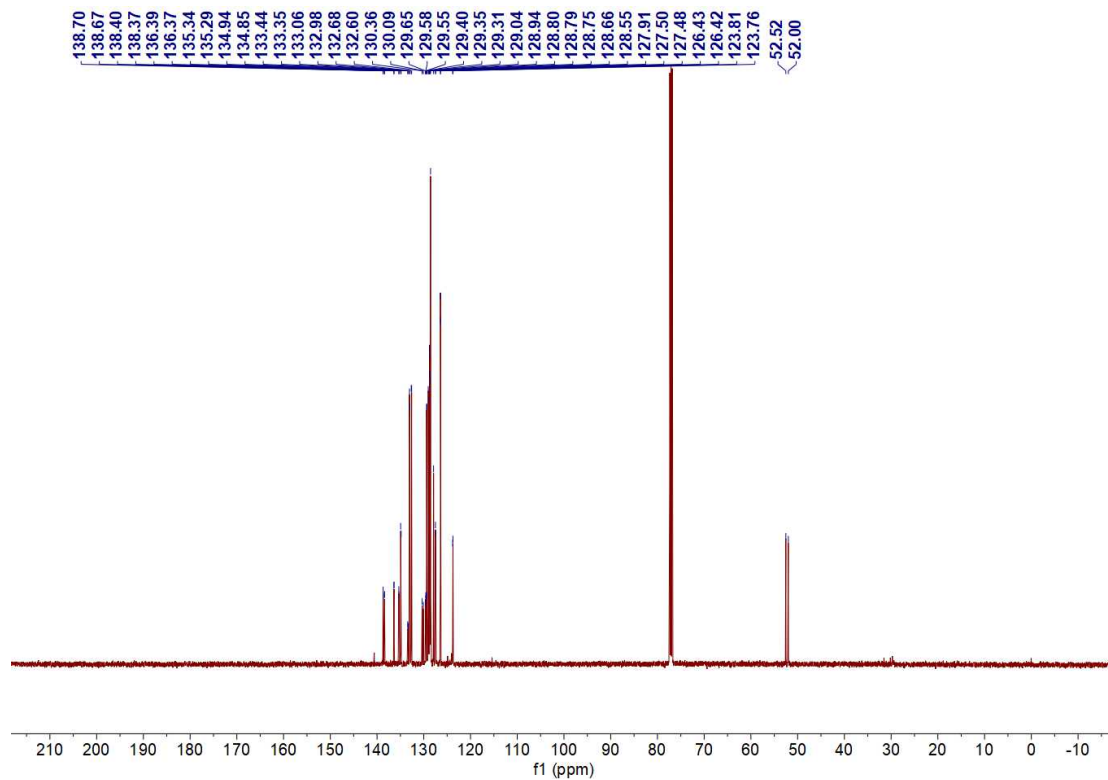

**<sup>31</sup>P NMR (202 MHz, Chloroform-d)**

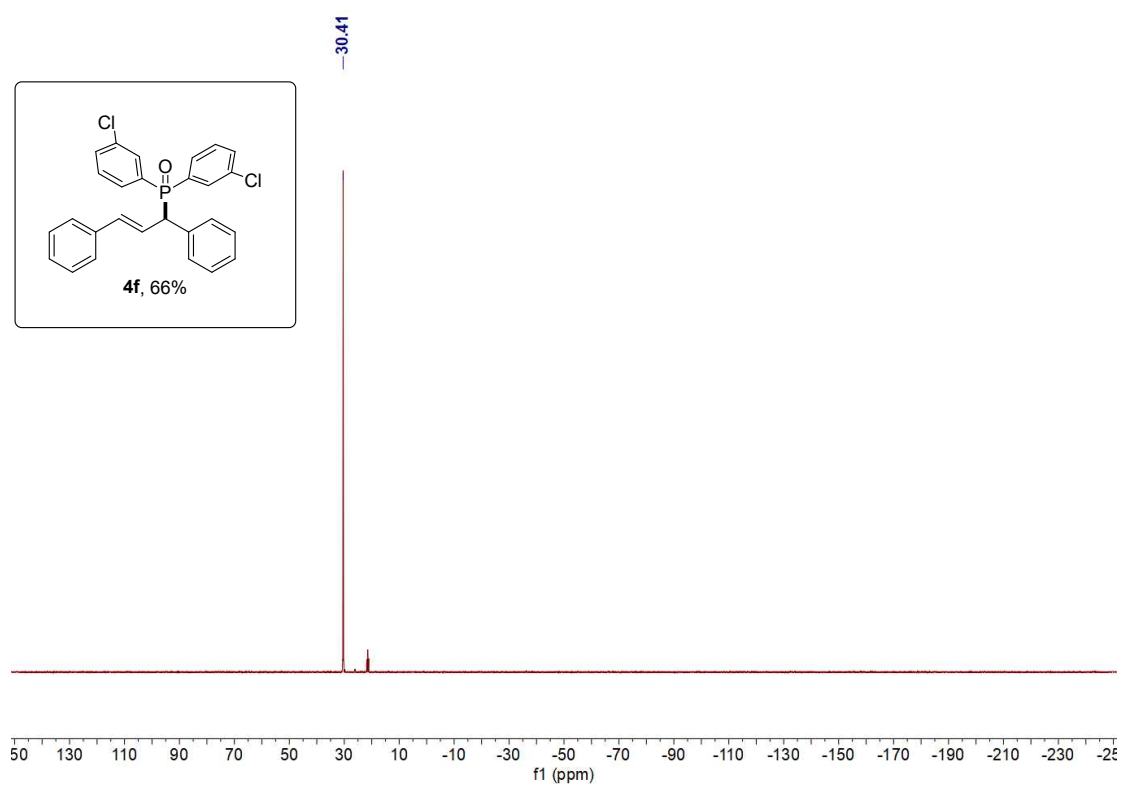

**(E)-bis(2-bromophenyl)(1,3-diphenylallyl)phosphine oxide (4g)**

**<sup>1</sup>H NMR (500 MHz, Chloroform-d)**

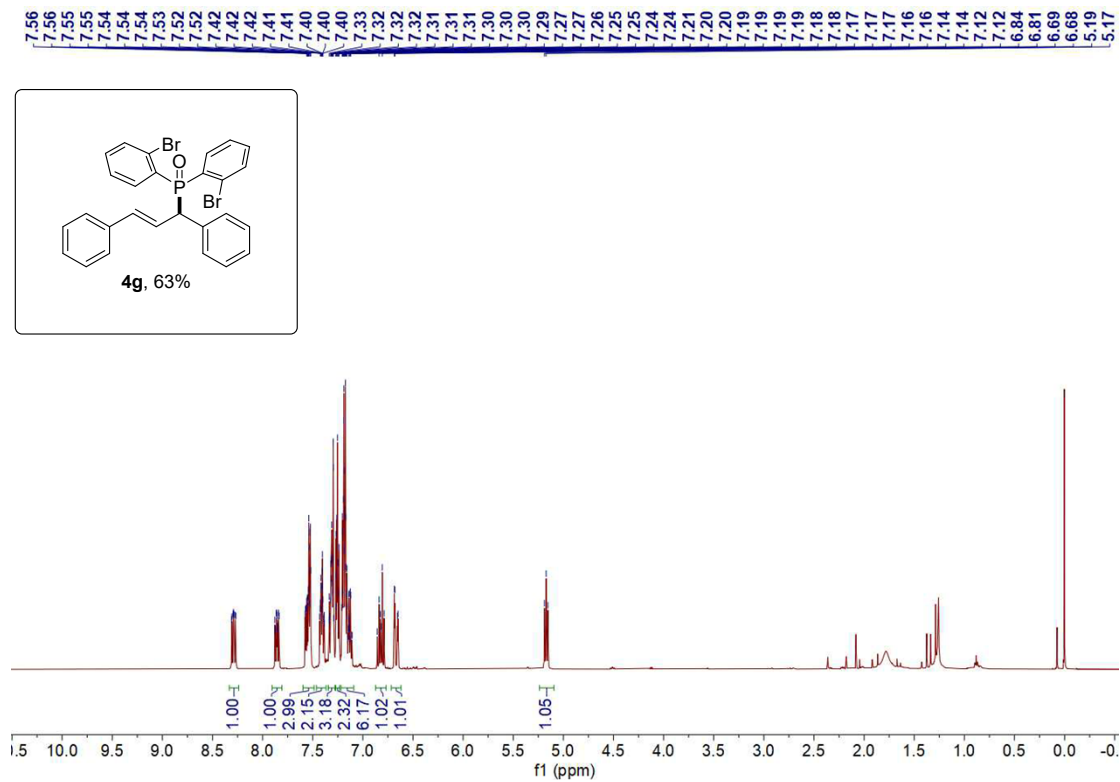

**<sup>13</sup>C NMR (126 MHz, Chloroform-d).**

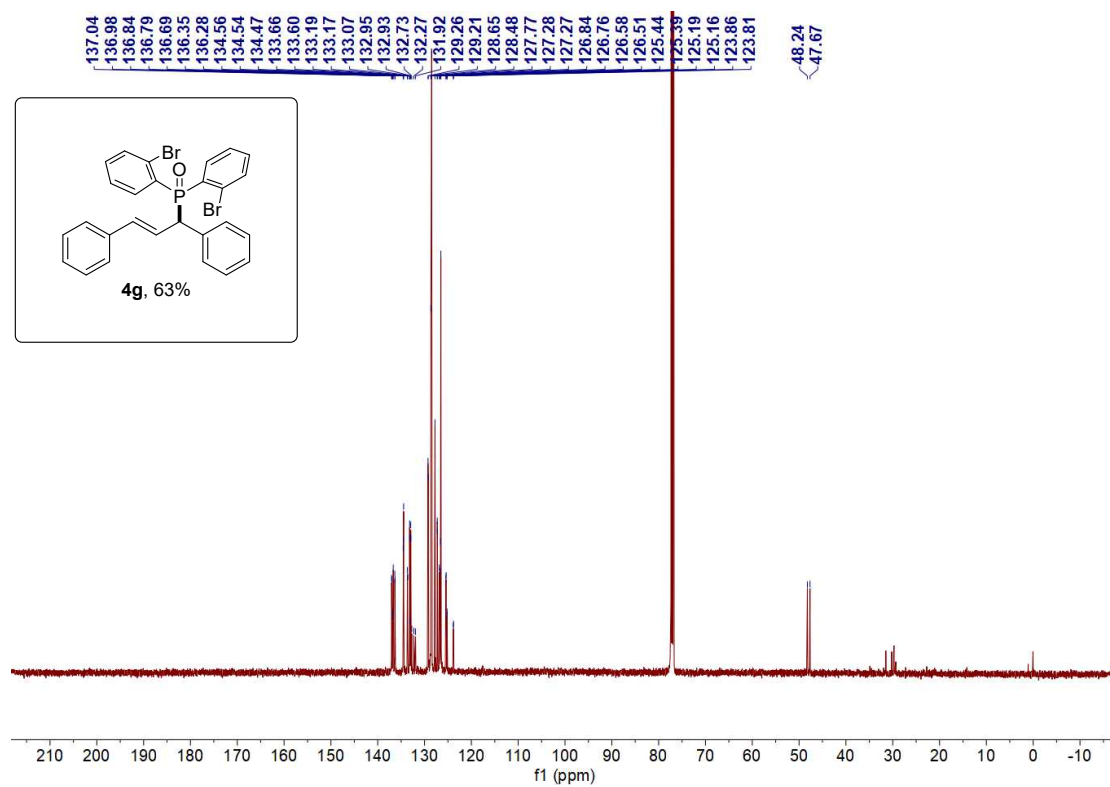

**<sup>31</sup>P NMR (202 MHz, Chloroform-d)**

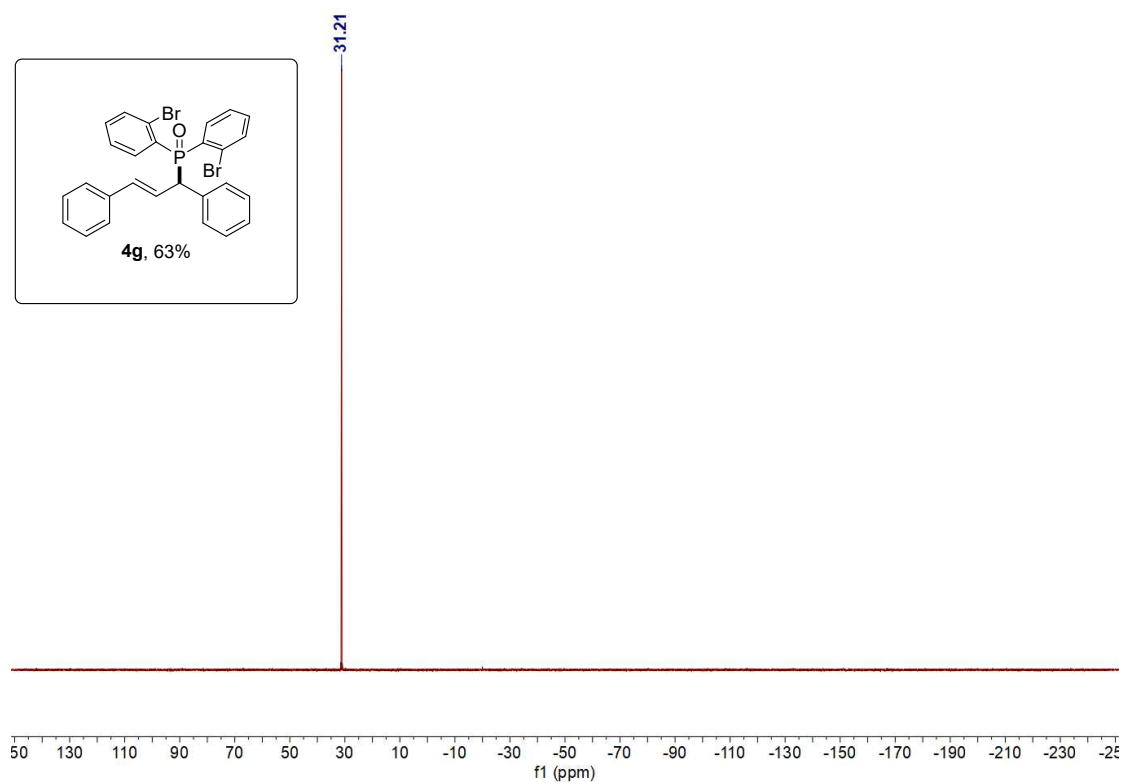

### (E)-(1,3-diphenylallyl)di(naphthalen-2-yl)phosphine oxide (4h)

<sup>1</sup>H NMR (500 MHz, Chloroform-d)

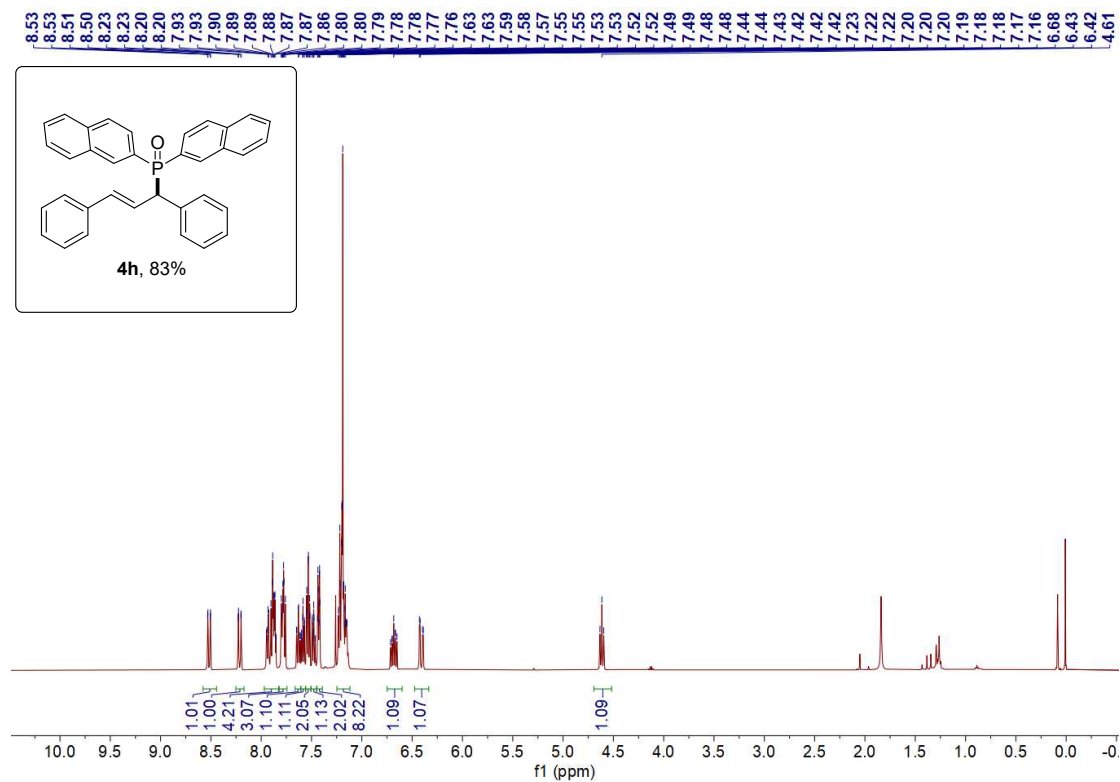

<sup>13</sup>C NMR (126 MHz, Chloroform-d)

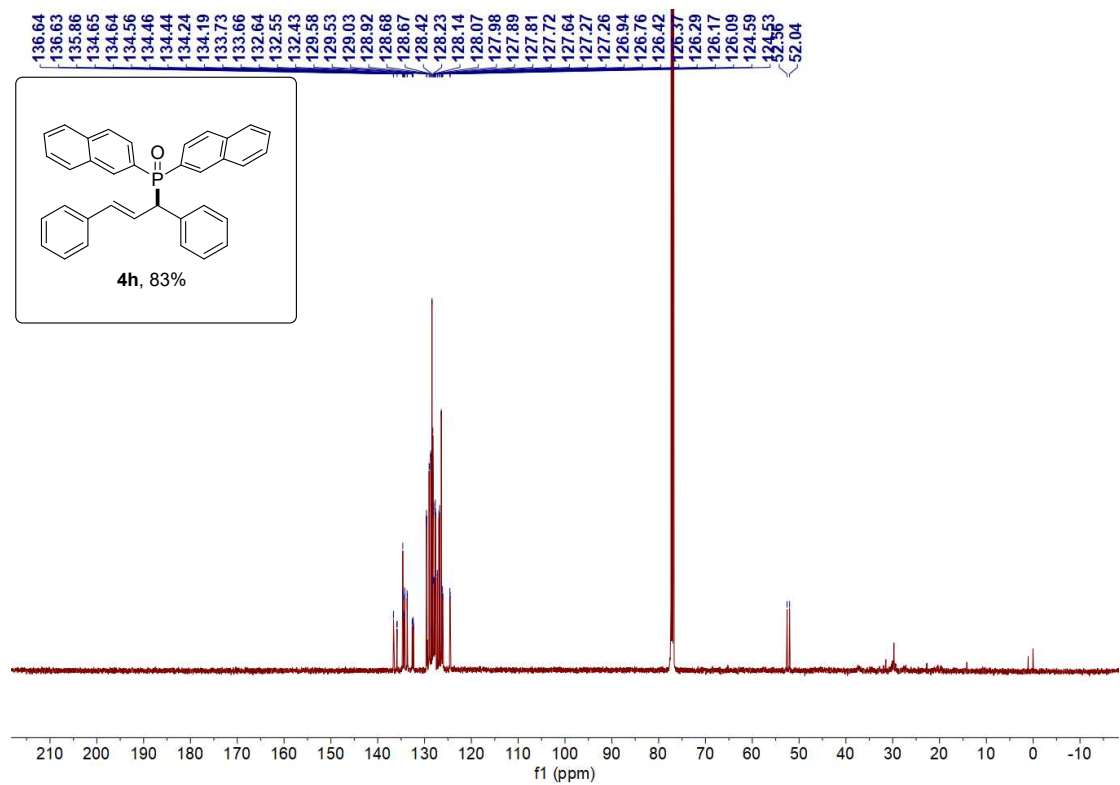



**<sup>31</sup>P NMR (202 MHz, Chloroform-d)**

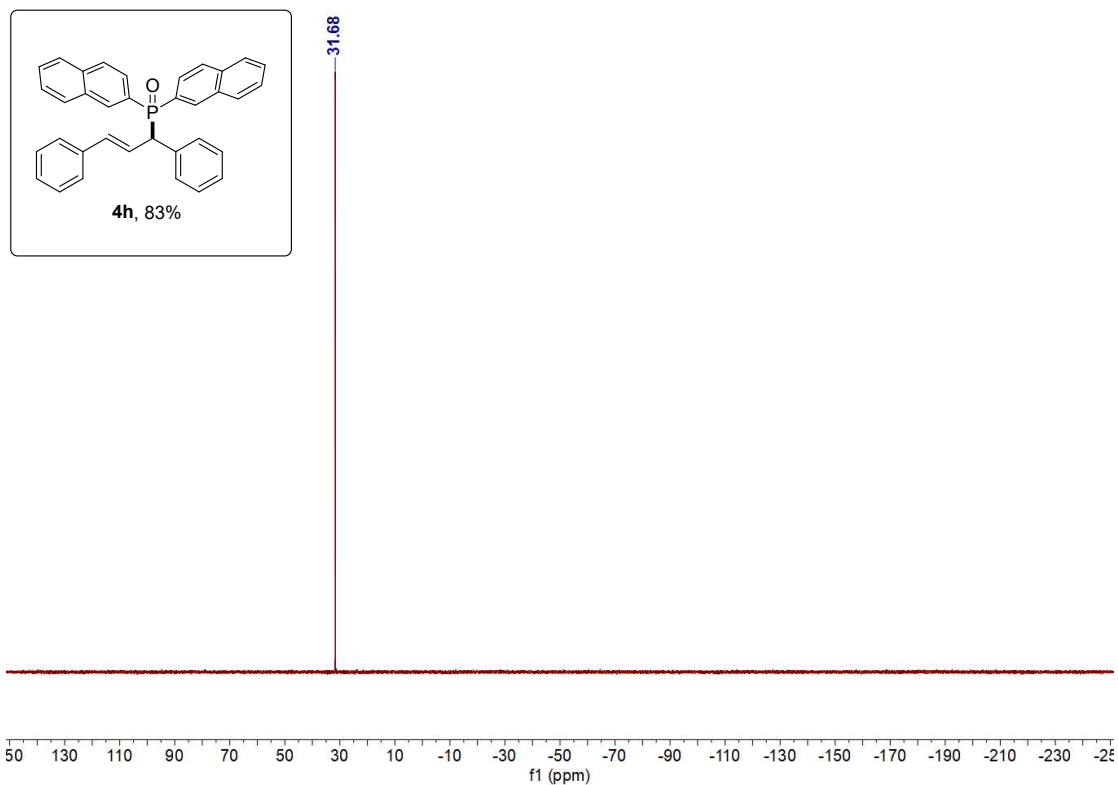

**(E)-(1,3-diphenylallyl)di(naphthalen-1-yl)phosphine oxide (4i)**

**<sup>1</sup>H NMR (500 MHz, Chloroform-d)**

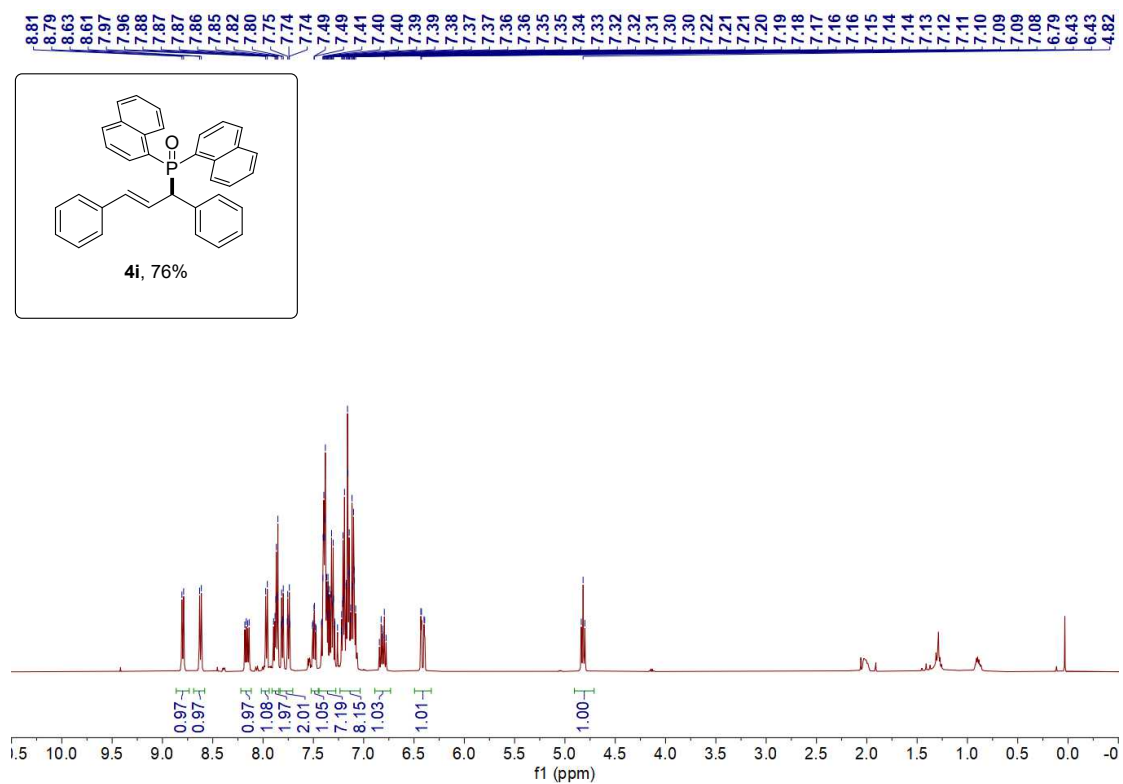

**<sup>13</sup>C NMR (126 MHz, Chloroform-d)**

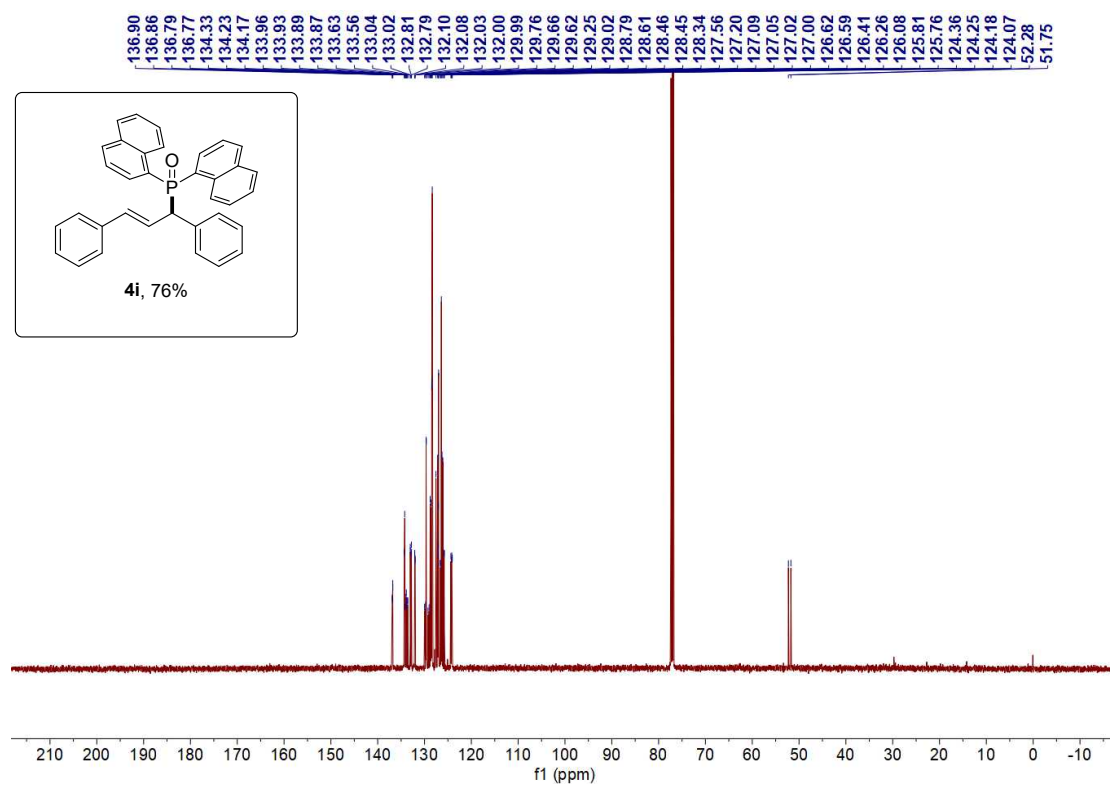

**<sup>31</sup>P NMR (202 MHz, Chloroform-d)**

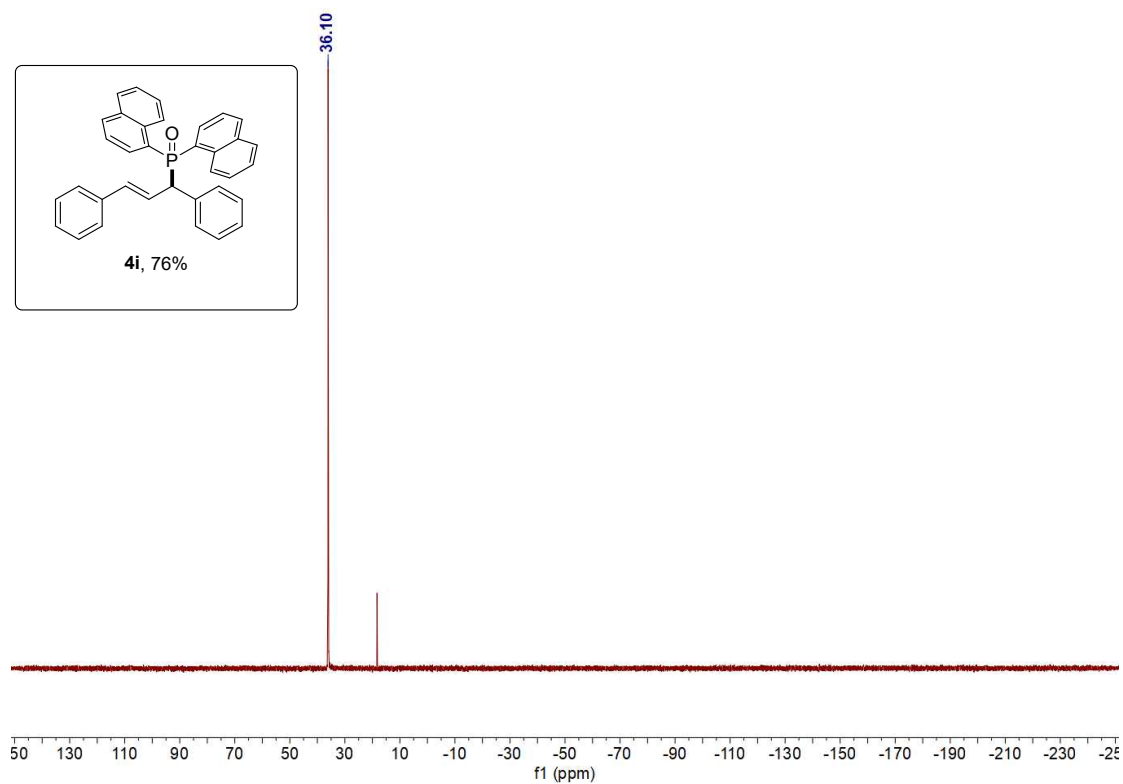

### dimethyl (E)-(1,3-diphenylallyl)phosphonate (4j)

<sup>1</sup>H NMR (500 MHz, Chloroform-d)

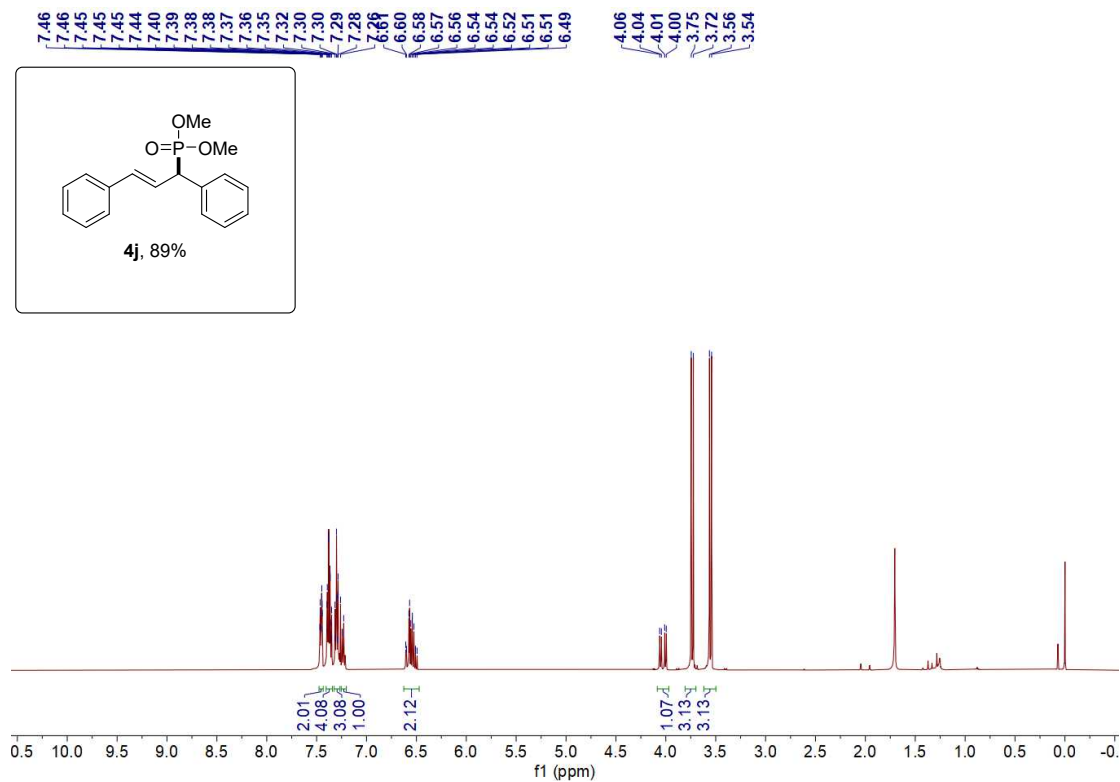

<sup>13</sup>C NMR (126 MHz, Chloroform-d)

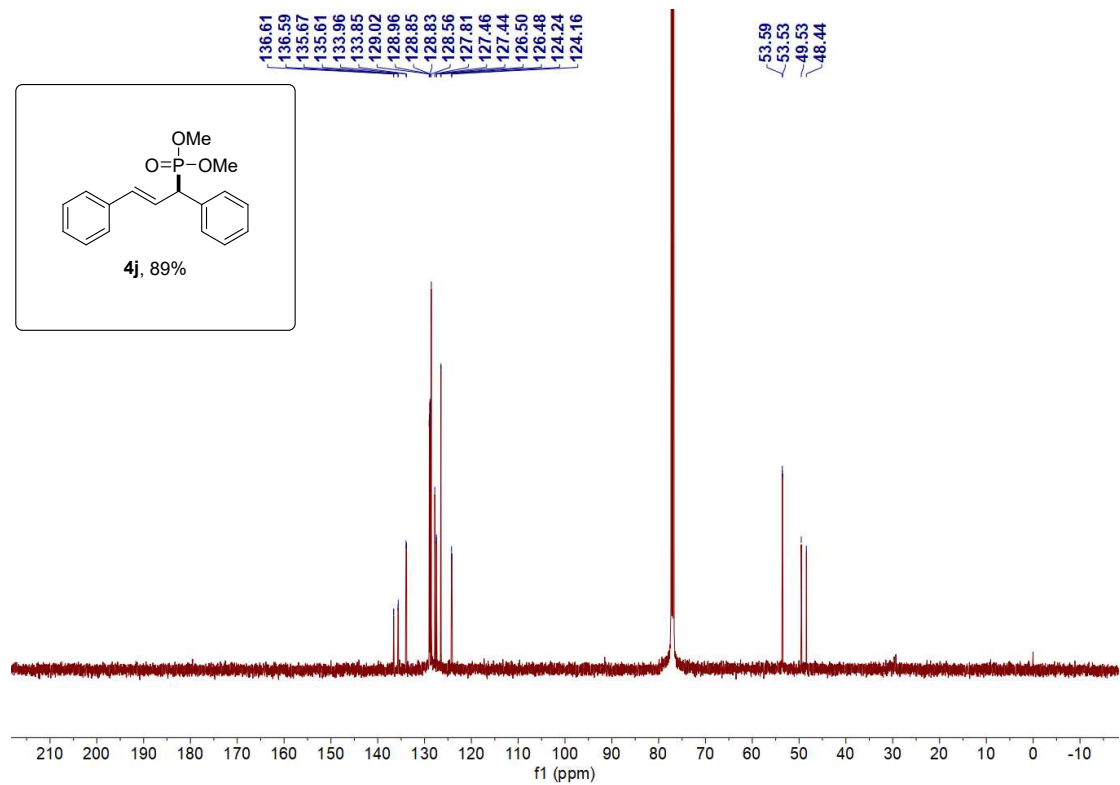

<sup>31</sup>P NMR (202 MHz, Chloroform-d)

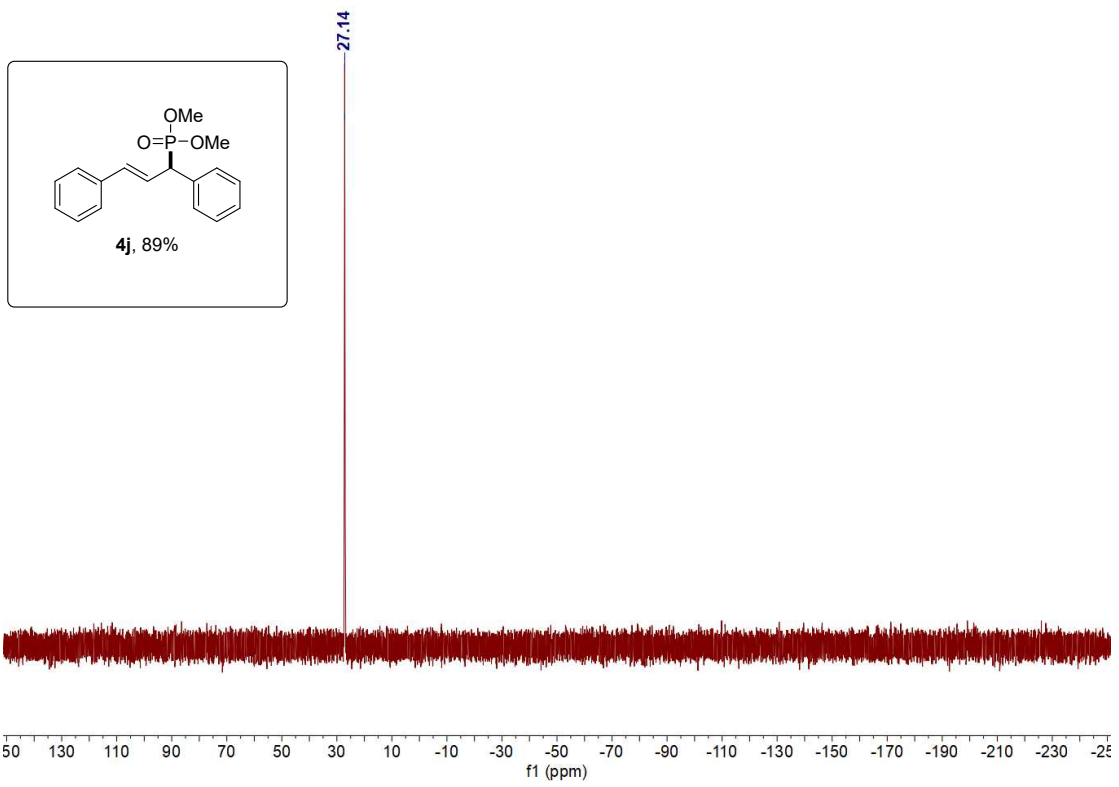

# diethyl (E)-(1,3-diphenylallyl)phosphonate (4k)

<sup>1</sup>H NMR (500 MHz, Chloroform-d)

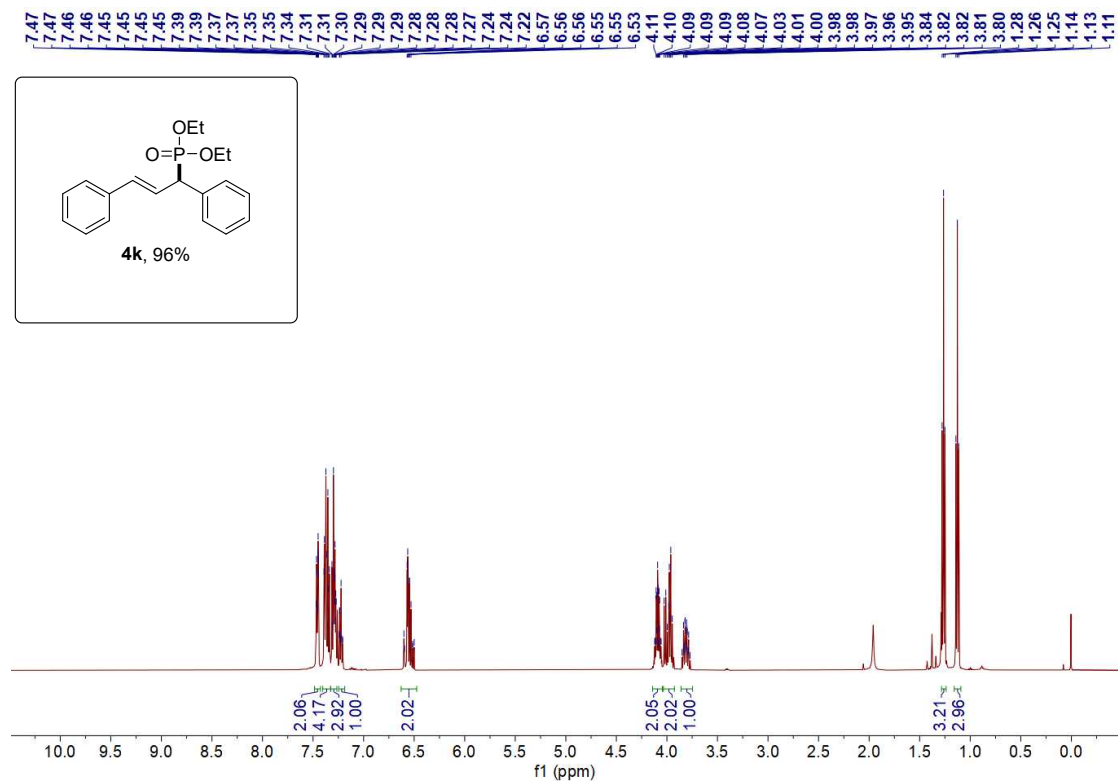

<sup>13</sup>C NMR (126 MHz, Chloroform-d)

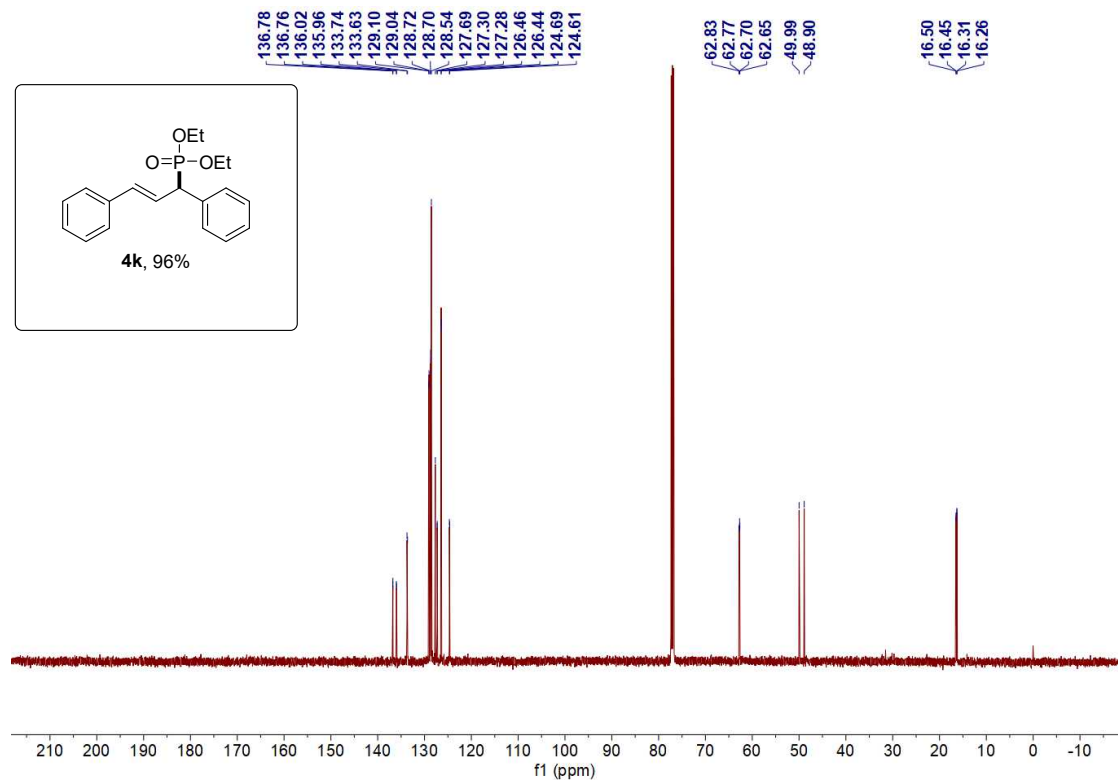

**<sup>31</sup>P NMR (202 MHz, Chloroform-d)**

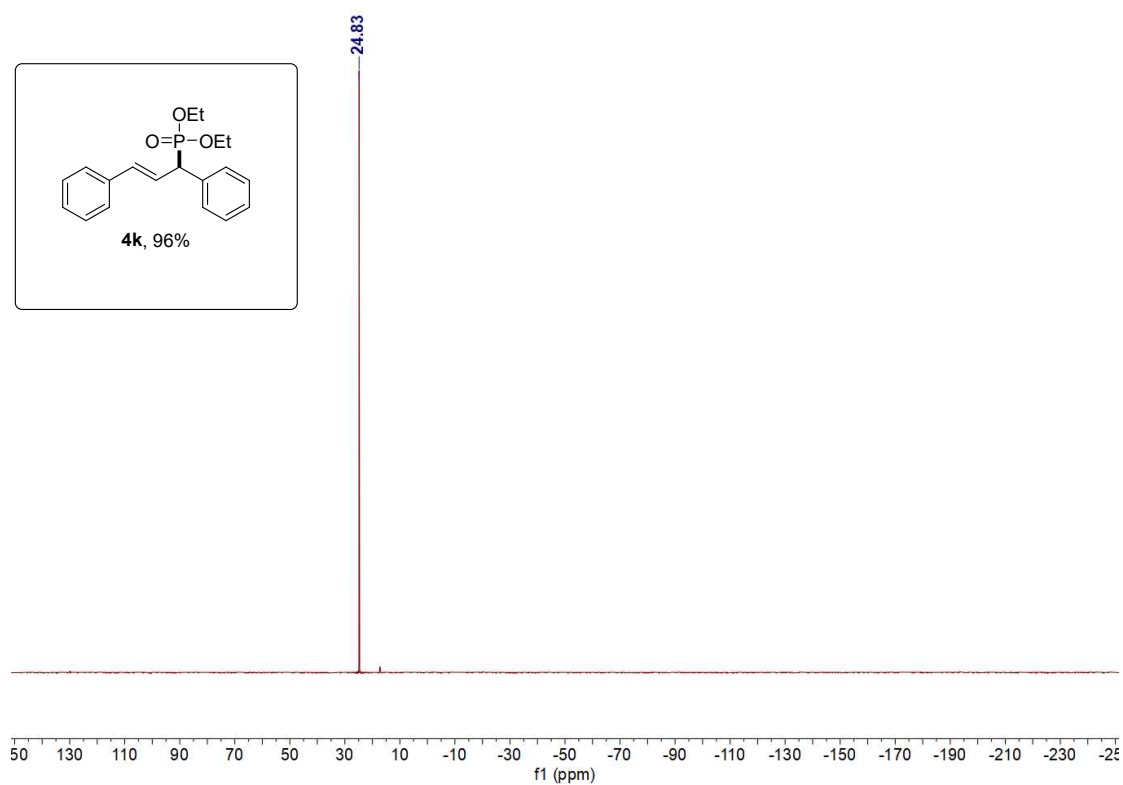

**(E)-(3-(phenylsulfonyl)prop-1-ene-1,3-diyl)dibenzene (6a)**

**<sup>1</sup>H NMR (500 MHz, Chloroform-d)**

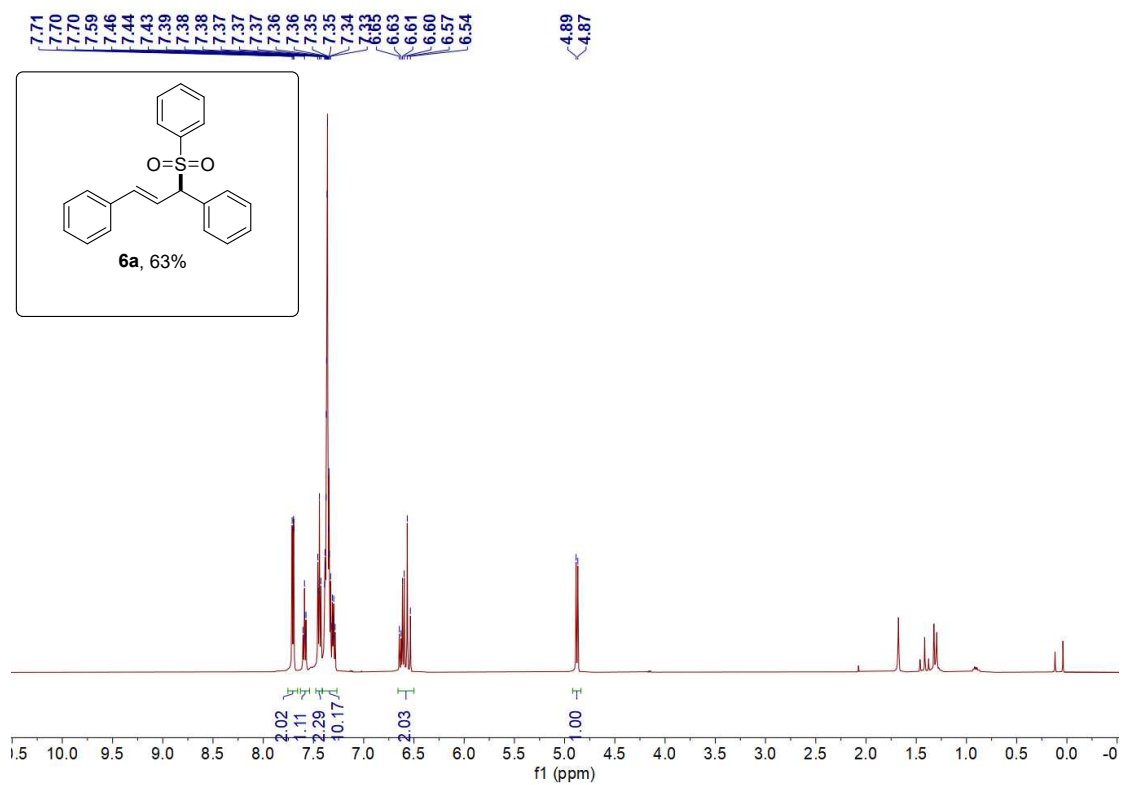

**<sup>13</sup>C NMR (126 MHz, Chloroform-d)**

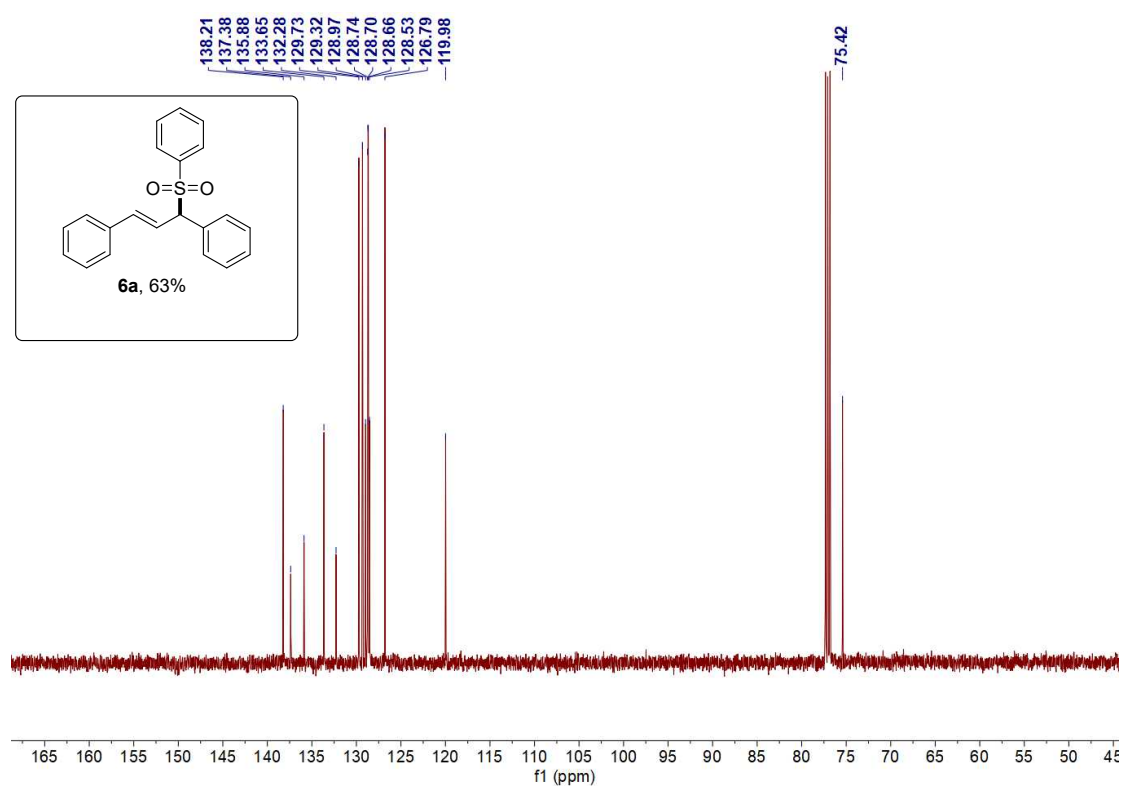

**(E)-(3-tosylprop-1-ene-1,3-diyl)dibenzene (6b)**

**<sup>1</sup>H NMR (500 MHz, Chloroform-d)**

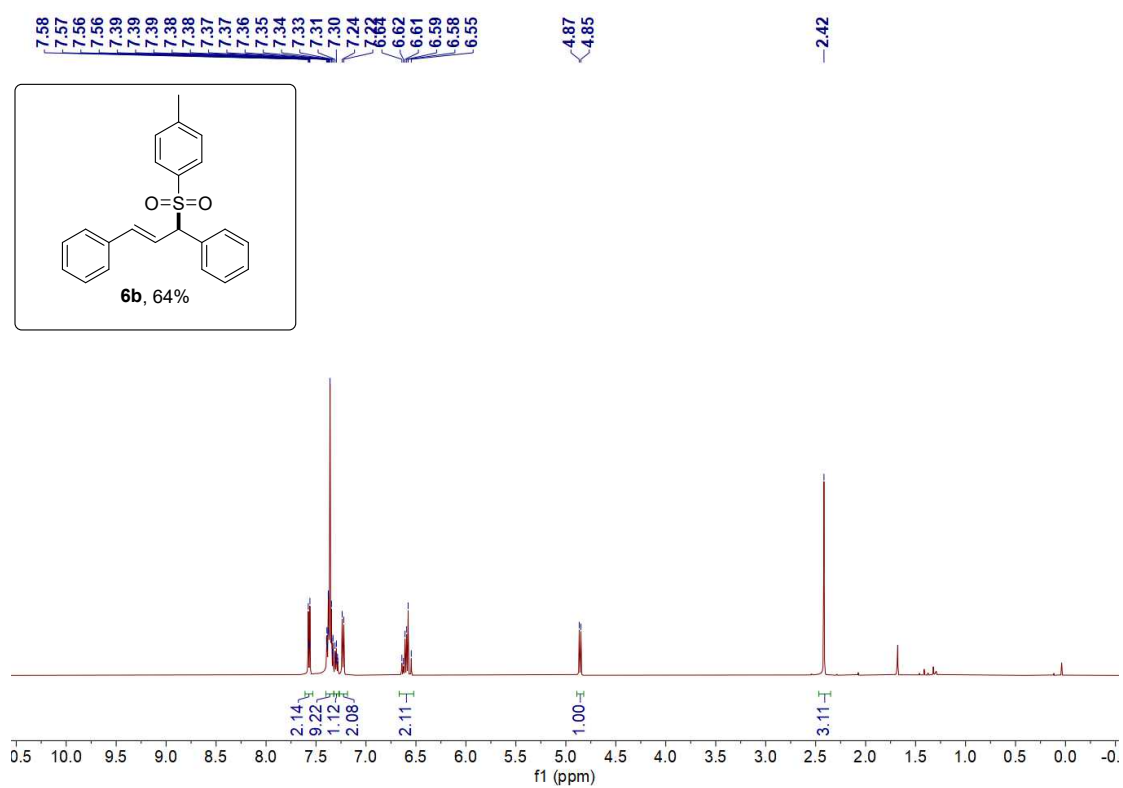

**<sup>13</sup>C NMR (126 MHz, Chloroform-d)**

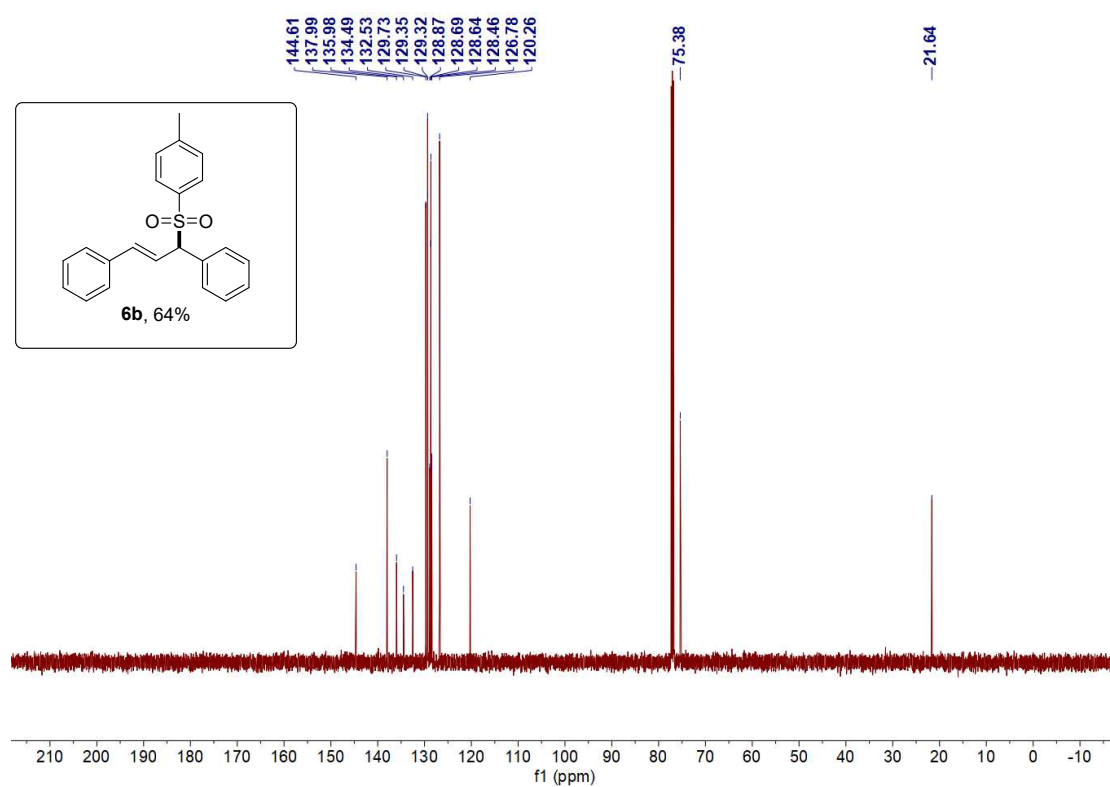

**(E)-3-((4-isopropylphenyl)sulfonyl)prop-1-ene-1,3-diyl dibenzene (6c)**

**<sup>1</sup>H NMR (500 MHz, Chloroform-d)**

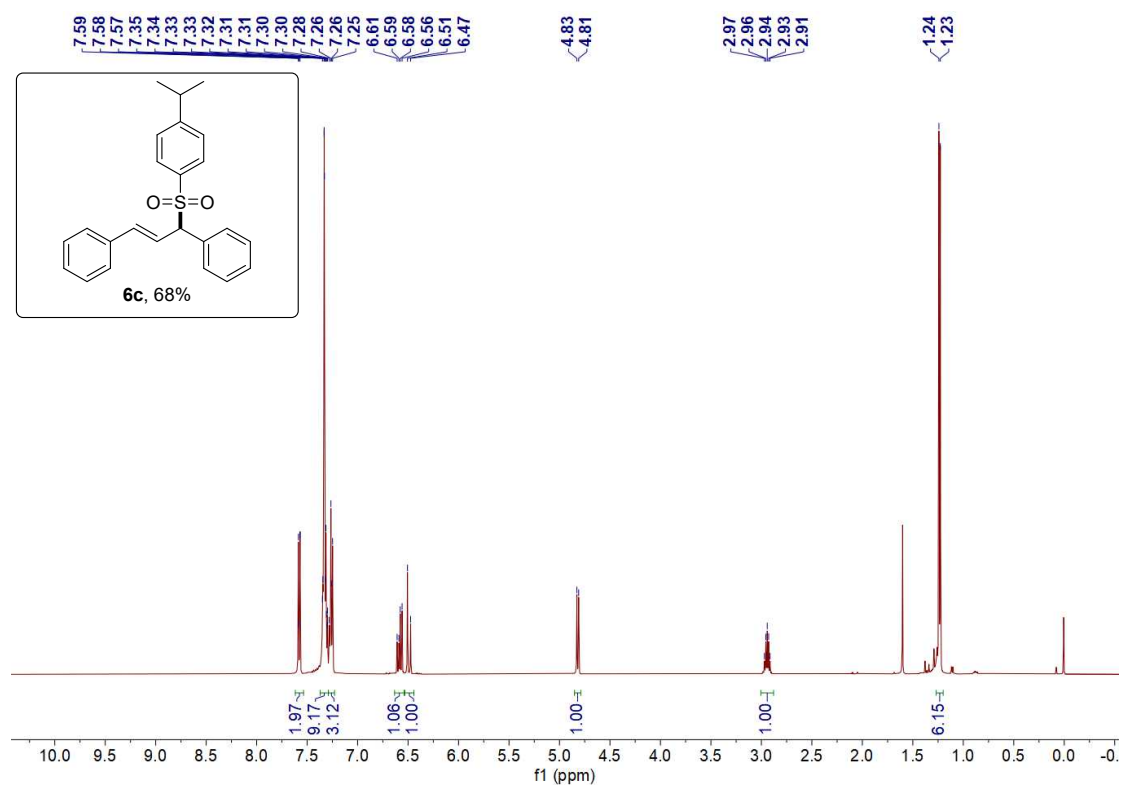



**<sup>13</sup>C NMR (126 MHz, Chloroform-d)**

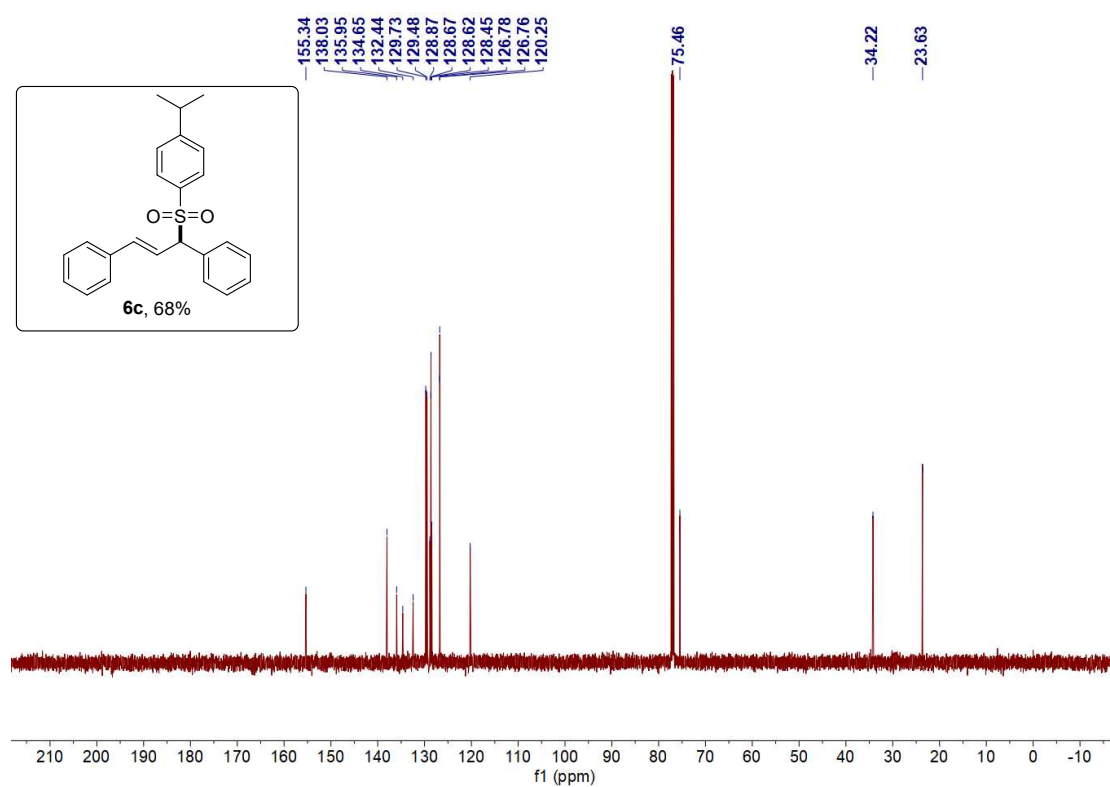

**(E)-3-((4-methoxyphenyl)sulfonyl)prop-1-ene-1,3-diyl)dibenzene (6d)**

**<sup>1</sup>H NMR (500 MHz, Chloroform-d)**

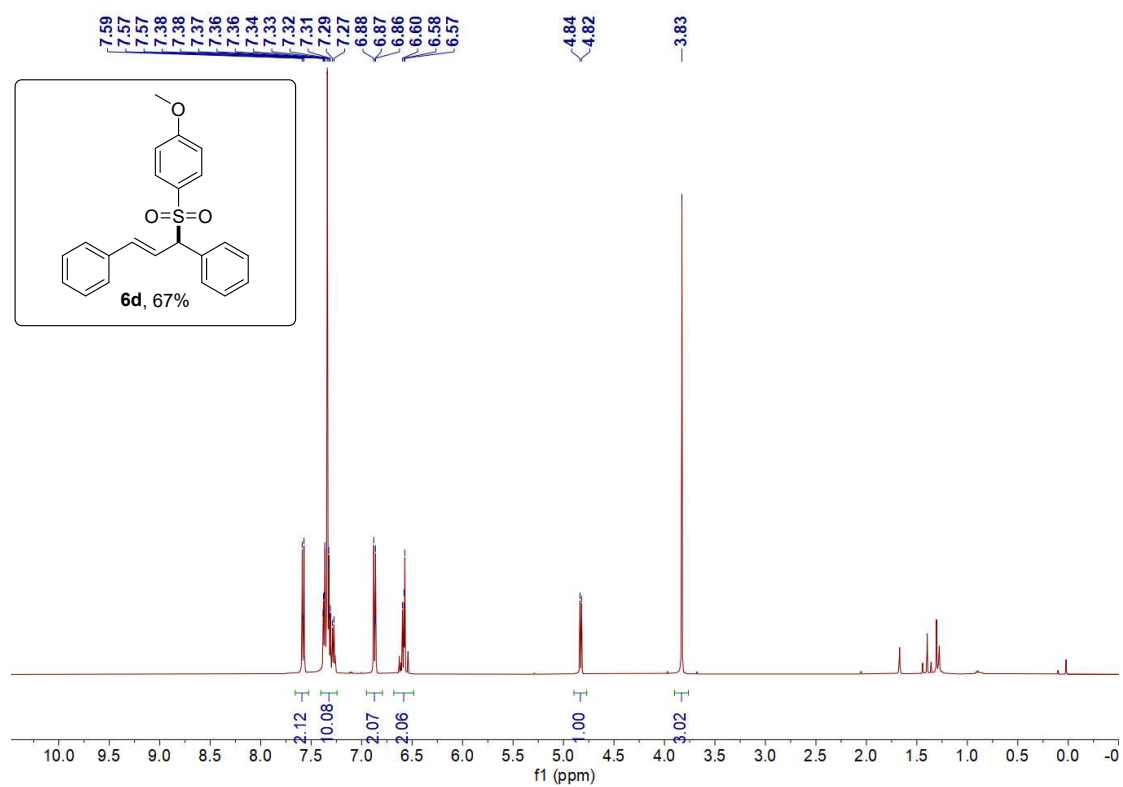

**<sup>13</sup>C NMR (126 MHz, Chloroform-d)**

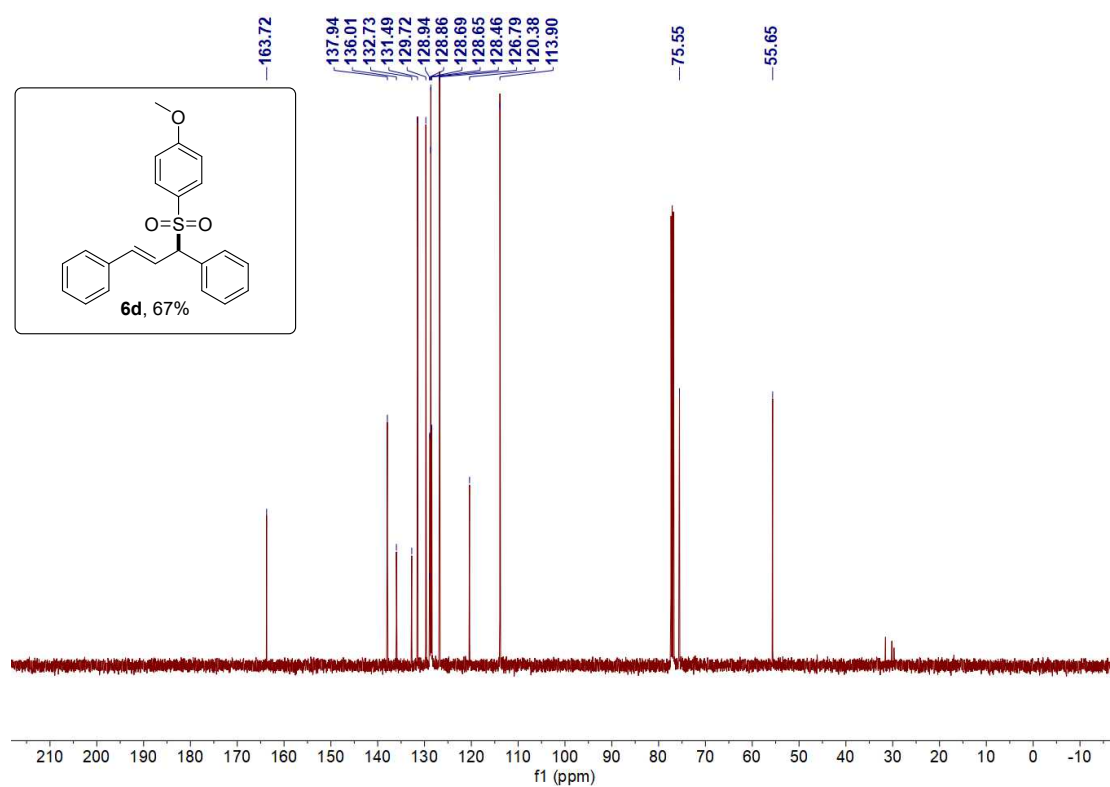

**(E)-(3-((4-fluorophenyl)sulfonyl)prop-1-ene-1,3-diyl)dibenzene (6e)**

**<sup>1</sup>H NMR (500 MHz, Chloroform-d)**

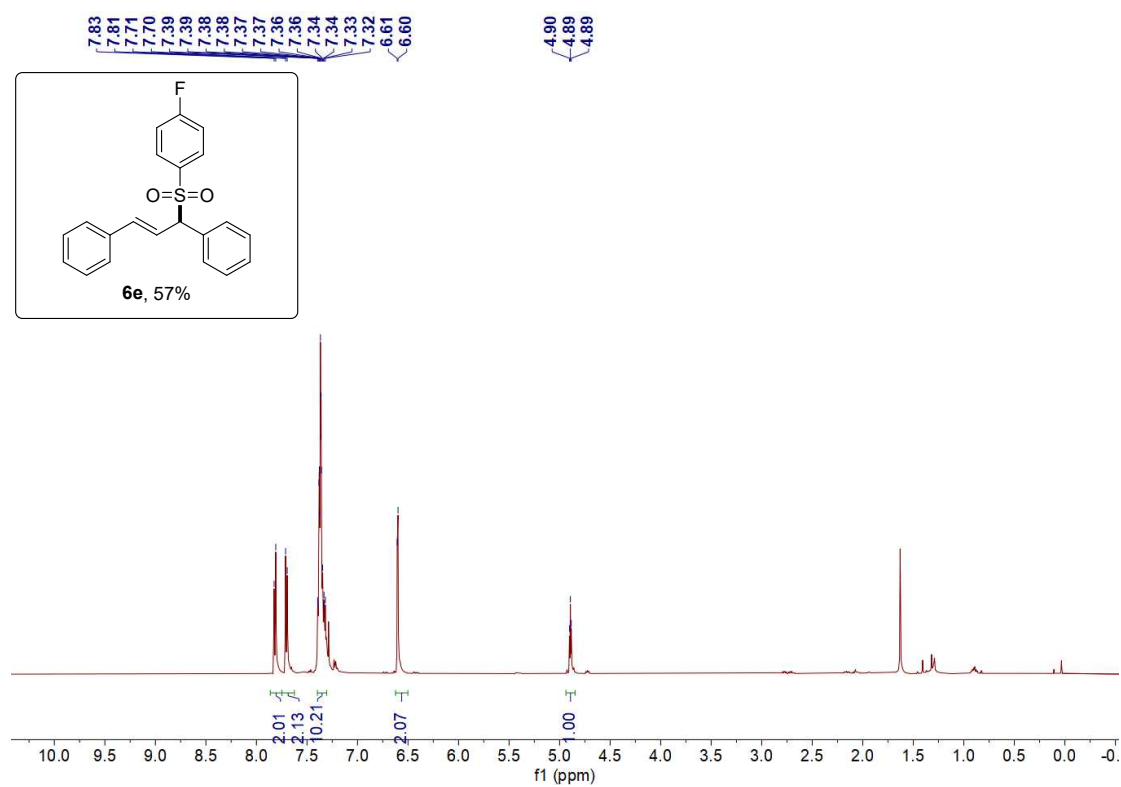

**<sup>13</sup>C NMR (126 MHz, Chloroform-d)**

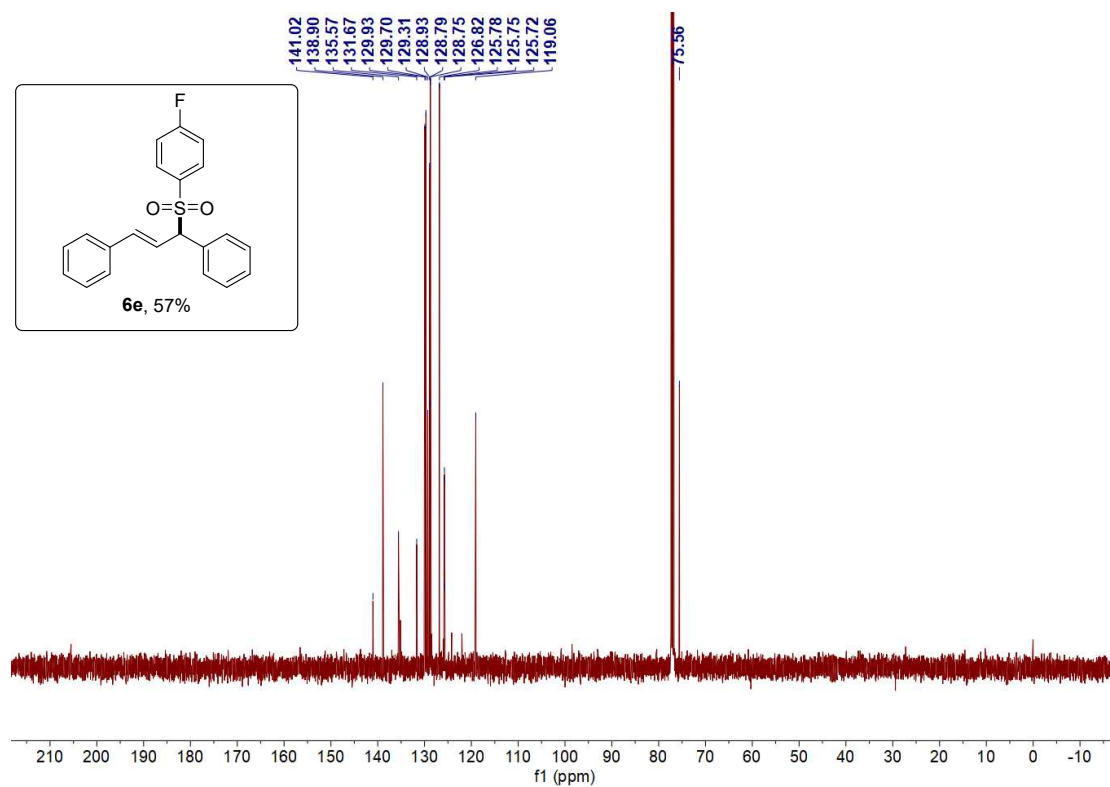

**<sup>19</sup>F NMR (471 MHz, Chloroform-d)**

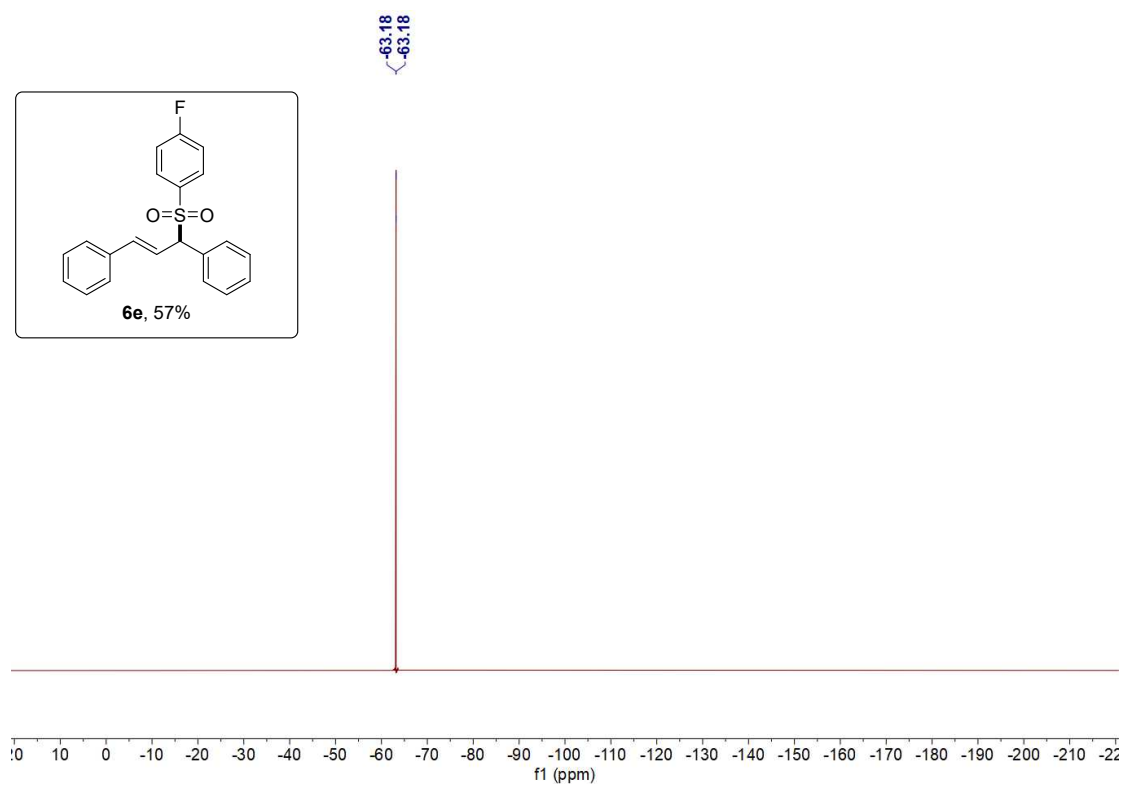

**(E)-3-((4-chlorophenyl)sulfonyl)prop-1-ene-1,3-diyl)dibenzene (6f)**

**<sup>1</sup>H NMR (500 MHz, Chloroform-d)**

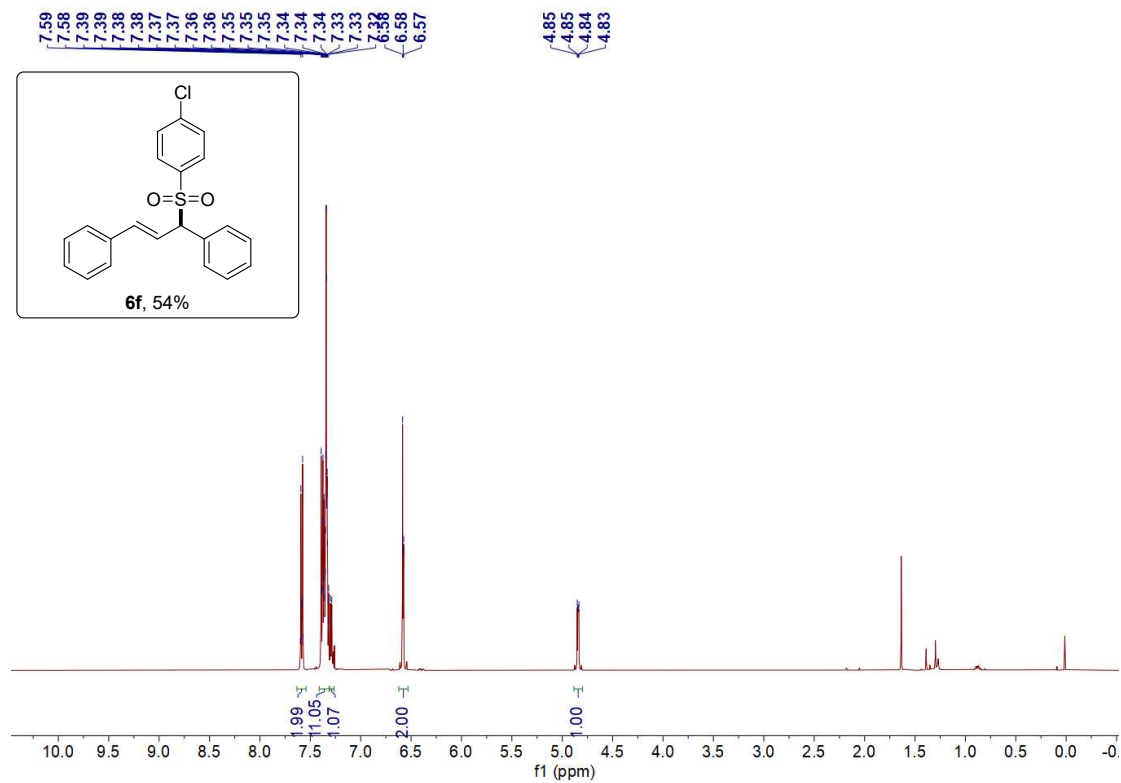

**<sup>13</sup>C NMR (126 MHz, Chloroform-d)**

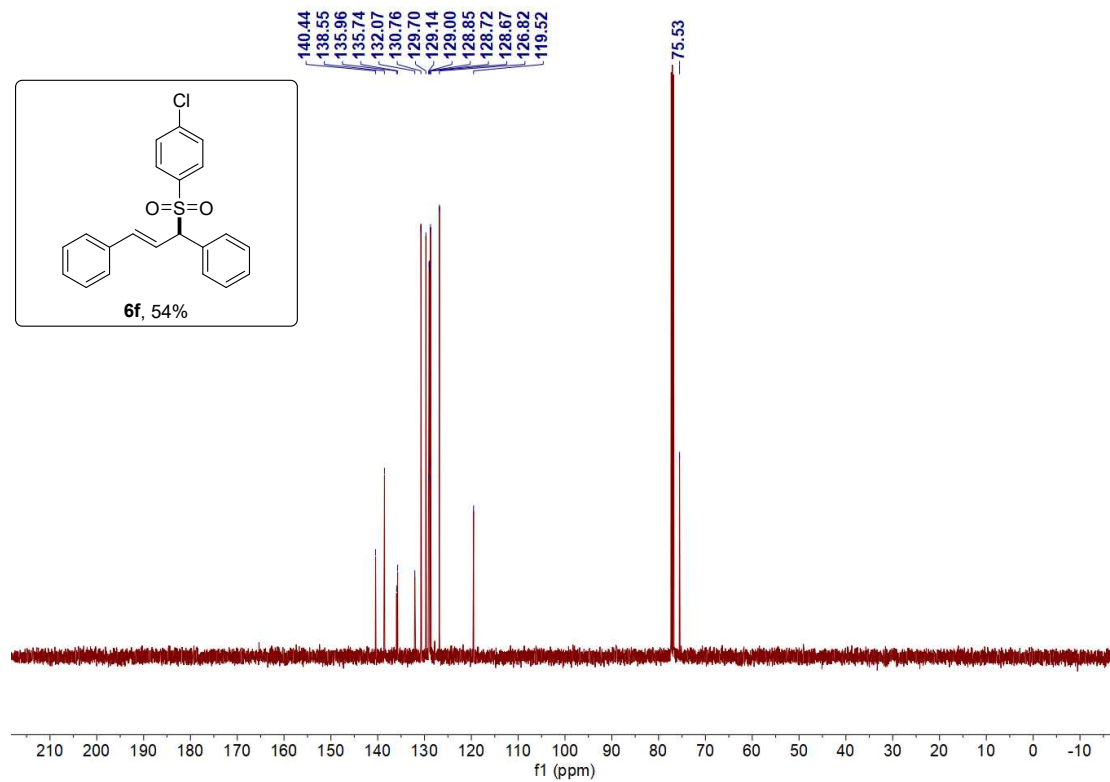

**(E)-3-((4-bromophenyl)sulfonyl)prop-1-ene-1,3-diyl)dibenzene (6g)**

**<sup>1</sup>H NMR (500 MHz, Chloroform-d)**

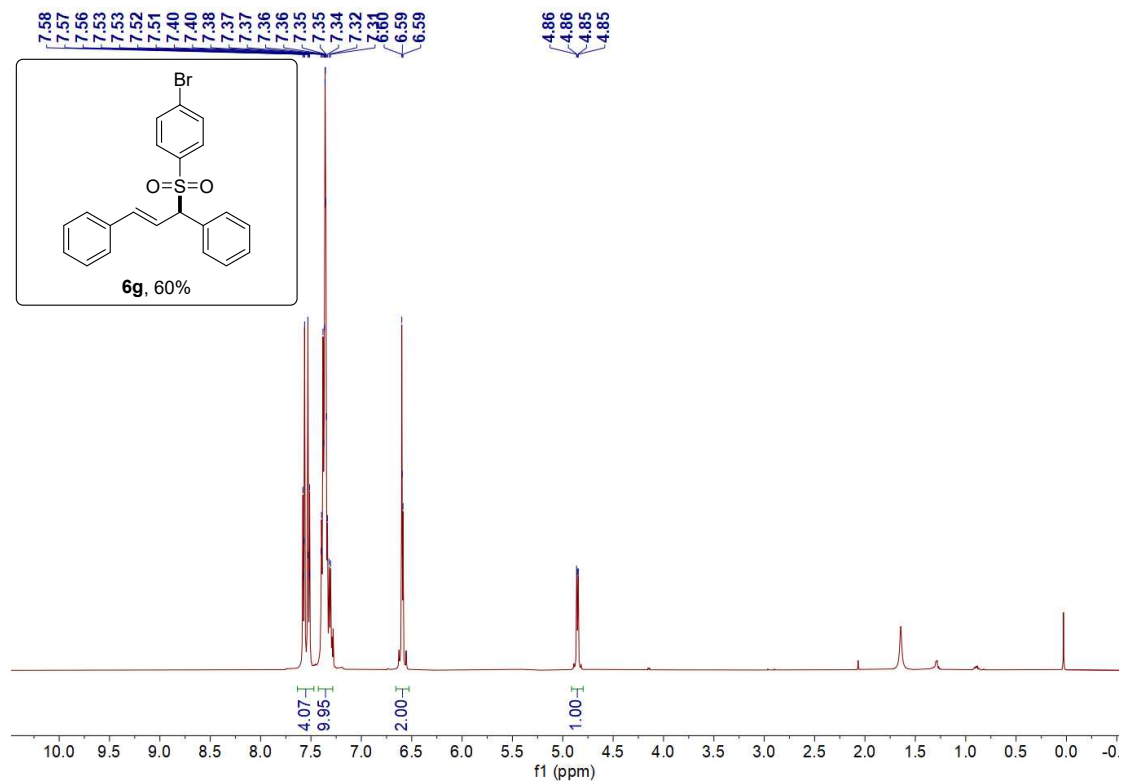

**<sup>13</sup>C NMR (126 MHz, Chloroform-d)**

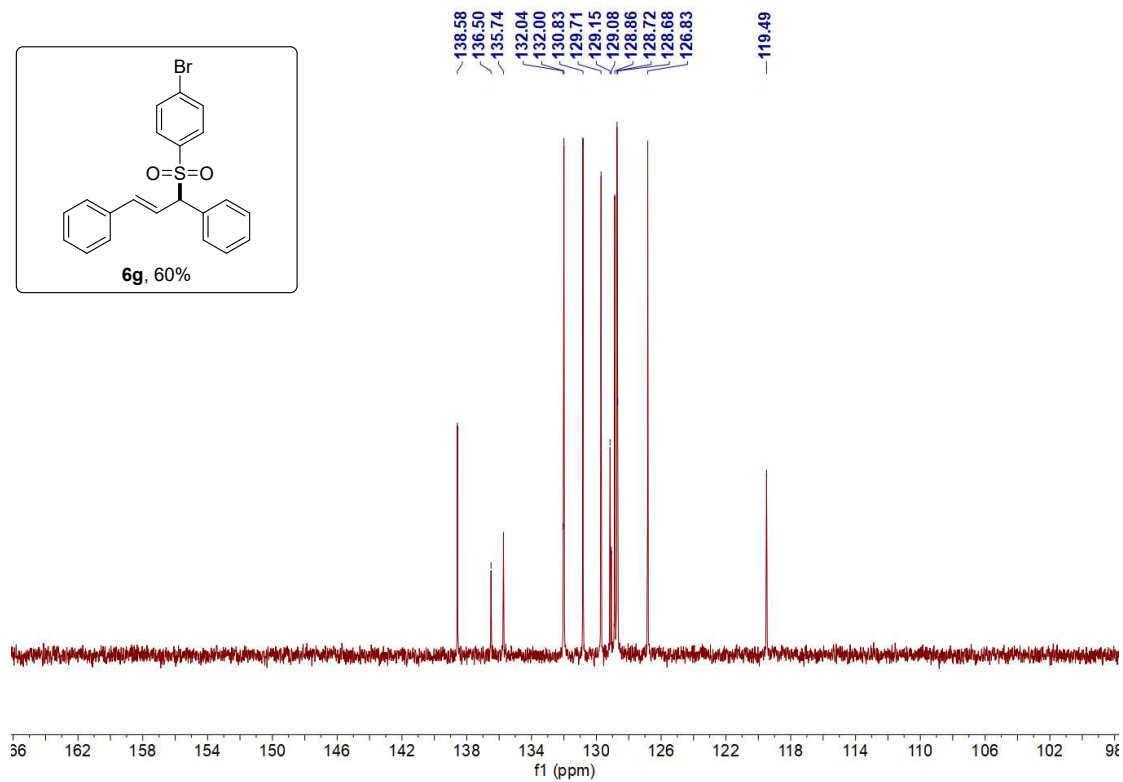

### (E)-3-((4-(trifluoromethyl)phenyl)sulfonyl)prop-1-ene-1,3-diyl)dibenzene (6h)

<sup>1</sup>H NMR (500 MHz, Chloroform-d)

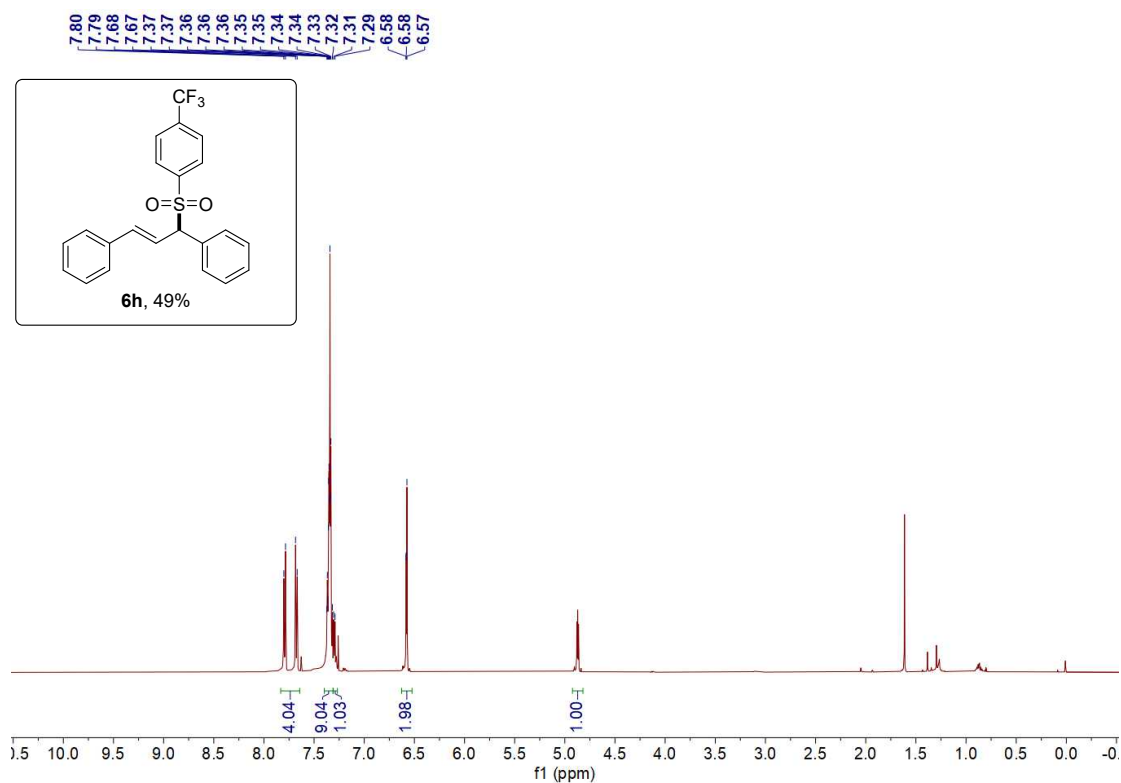

<sup>13</sup>C NMR (126 MHz, Chloroform-d)

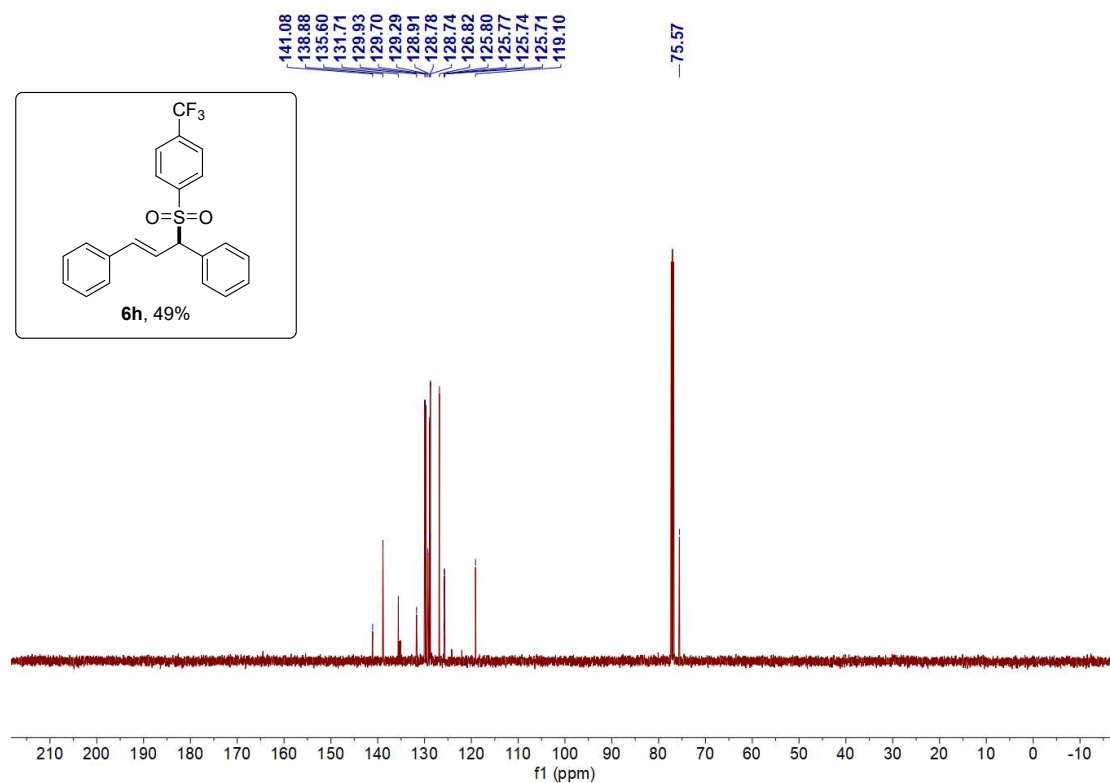

**<sup>19</sup>F NMR (471 MHz, Chloroform-d)**

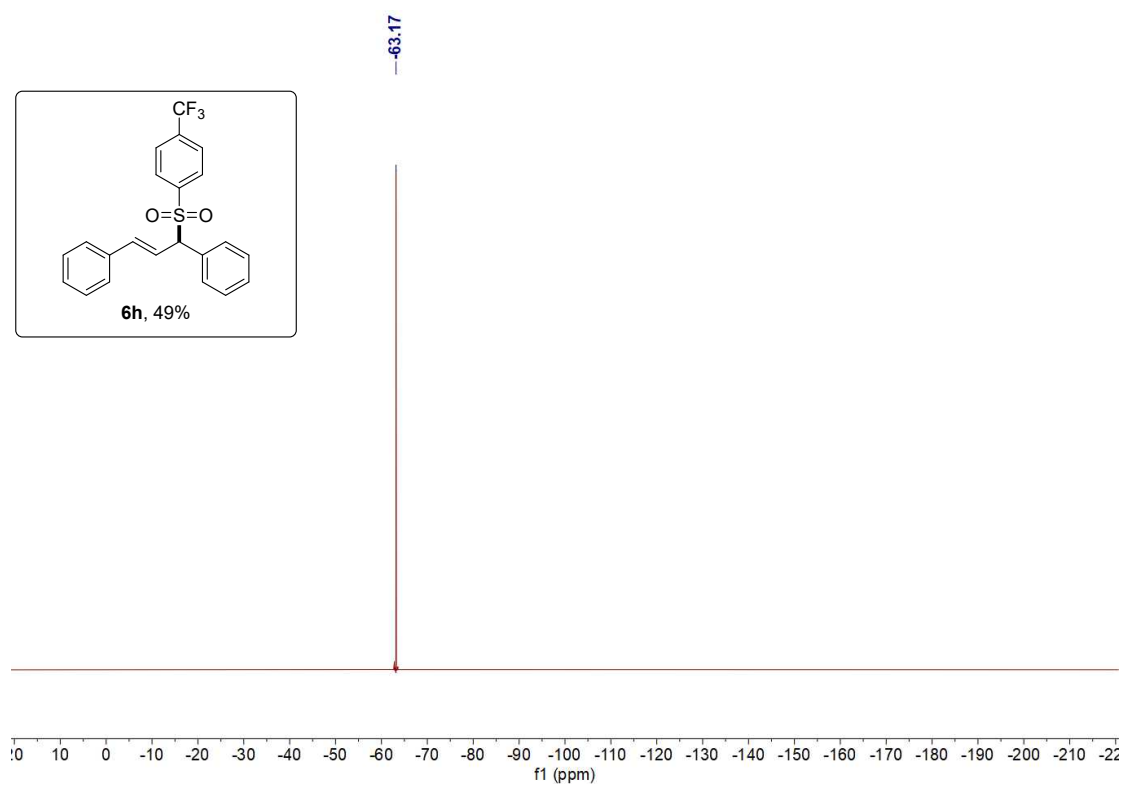

**(E)-3-((3-nitrophenyl)sulfonyl)prop-1-ene-1,3-diyl)dibenzene (6i)**

**<sup>1</sup>H NMR (500 MHz, Chloroform-d)**

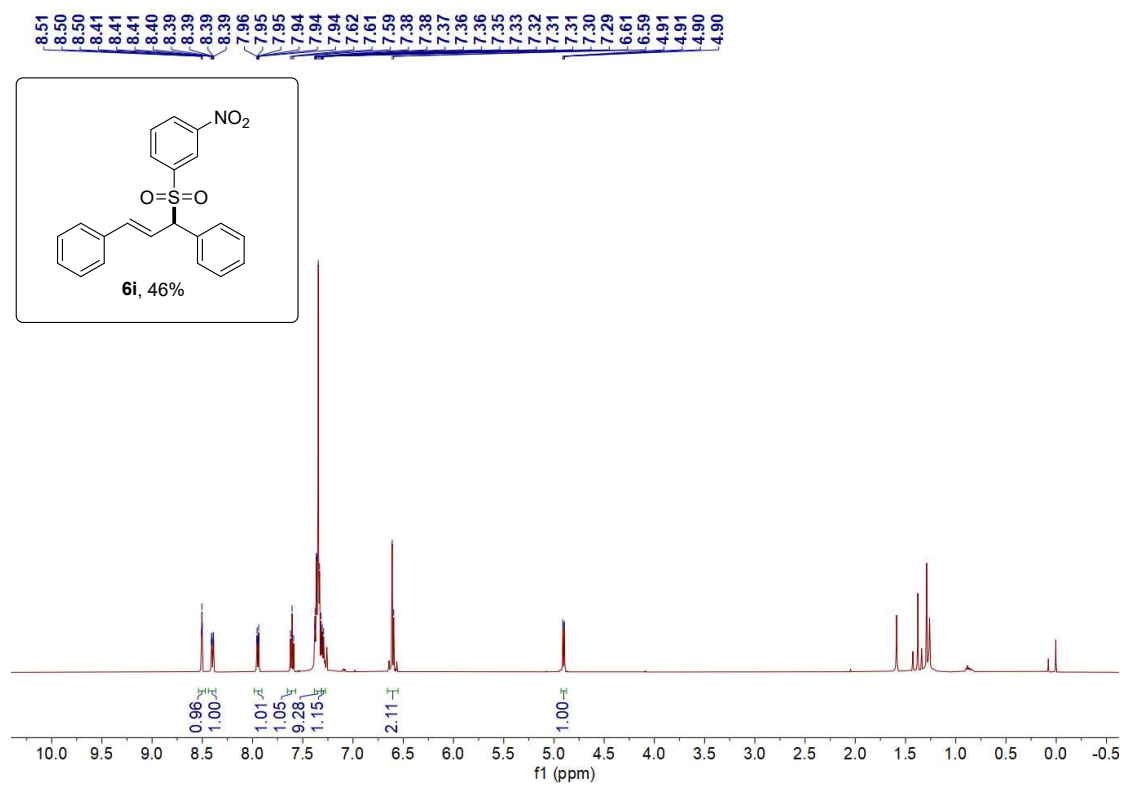

**<sup>13</sup>C NMR (126 MHz, Chloroform-d)**

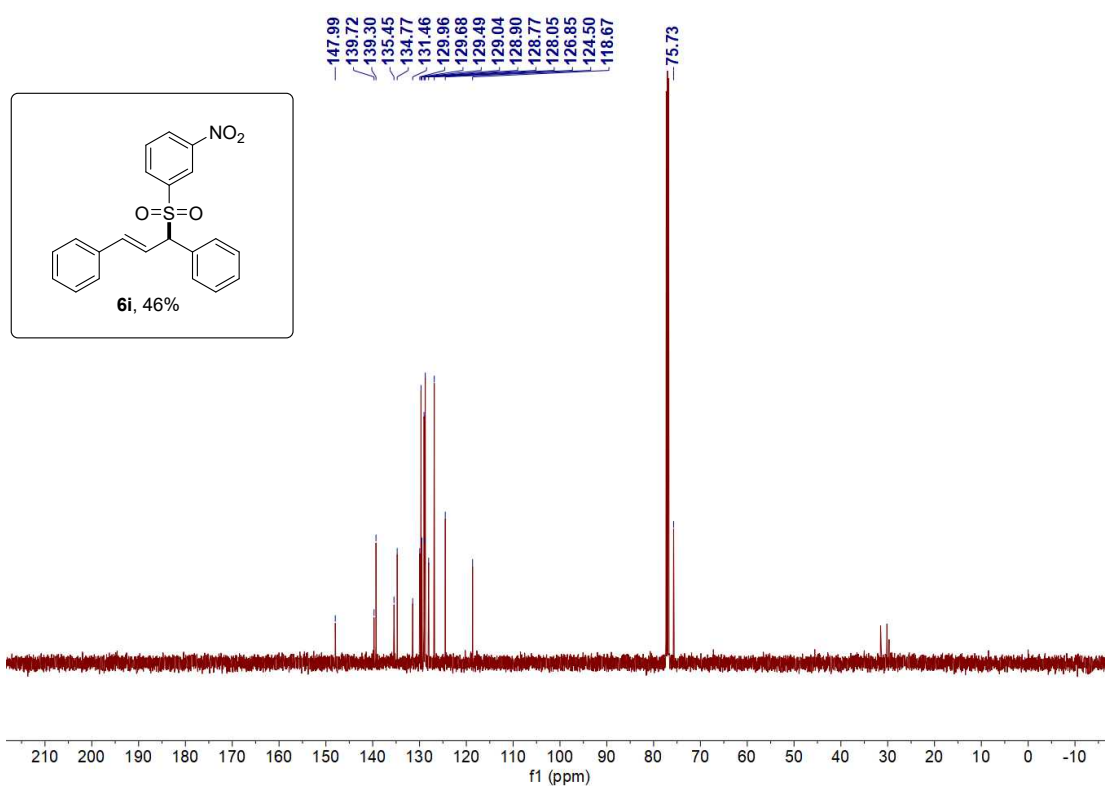

**(E)-3-((4-(trifluoromethoxy)phenyl)sulfonyl)prop-1-ene-1,3-diyldibenzene (6j)**

**<sup>1</sup>H NMR (500 MHz, Chloroform-d)**

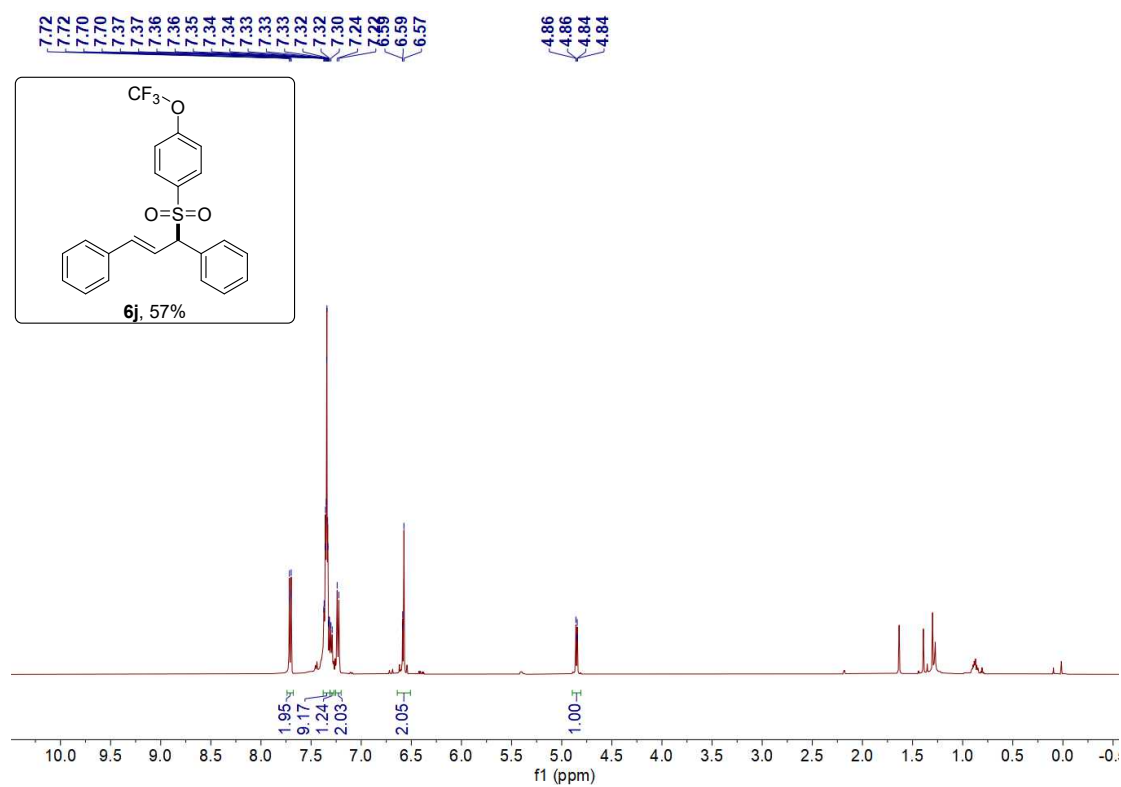



**<sup>13</sup>C NMR (126 MHz, Chloroform-d)**

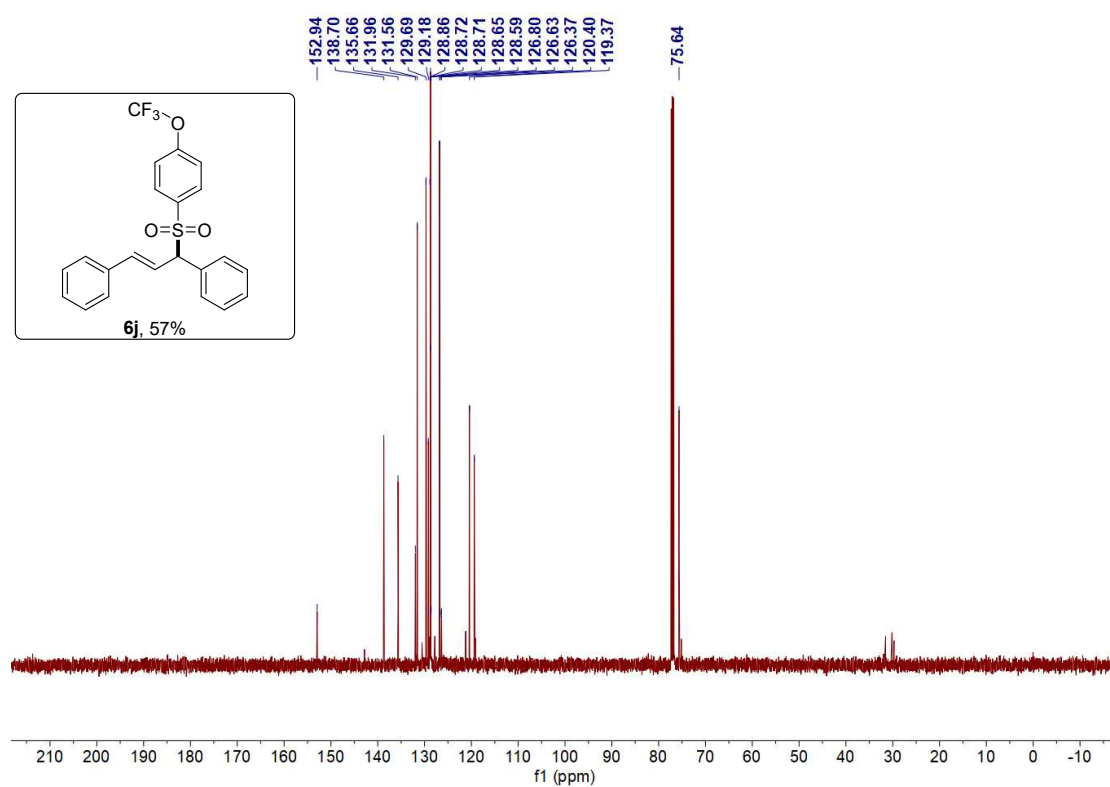

**<sup>19</sup>F NMR (471 MHz, Chloroform-d)**

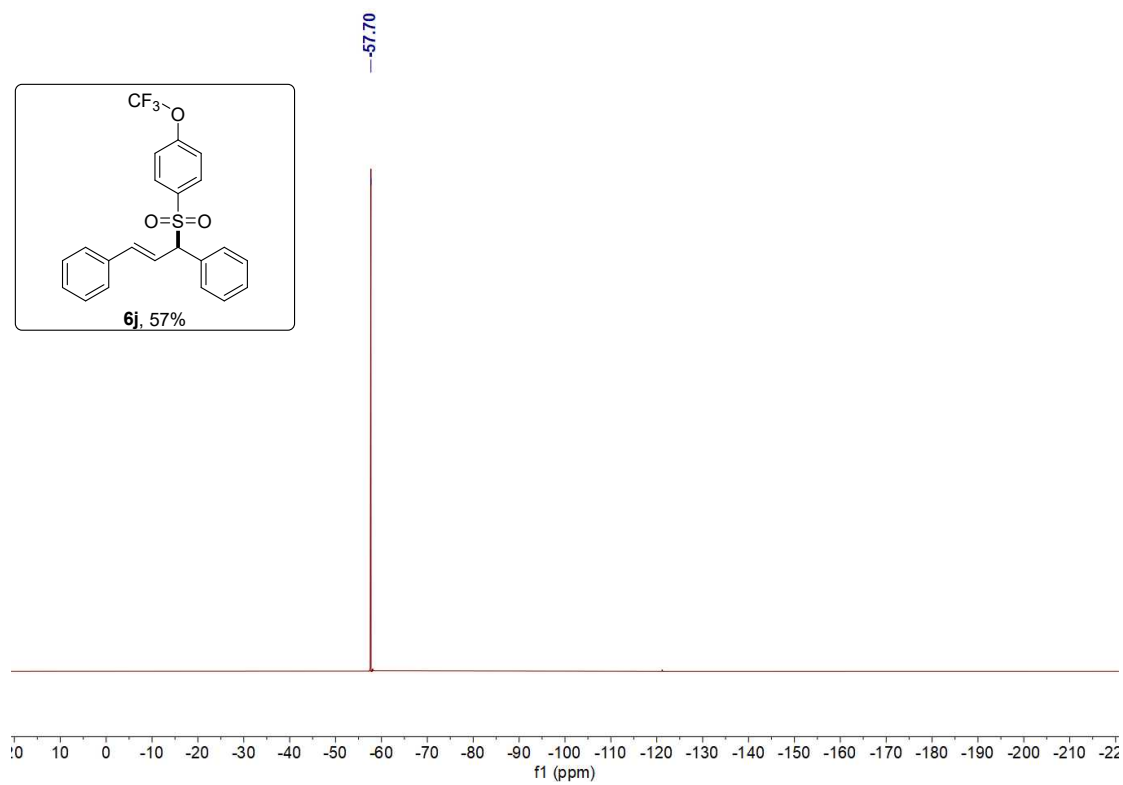

### (E)-N-(4-((1,3-diphenylallyl)sulfonyl)phenyl)acetamide (6k)

<sup>1</sup>H NMR (500 MHz, DMSO-d<sub>6</sub>)

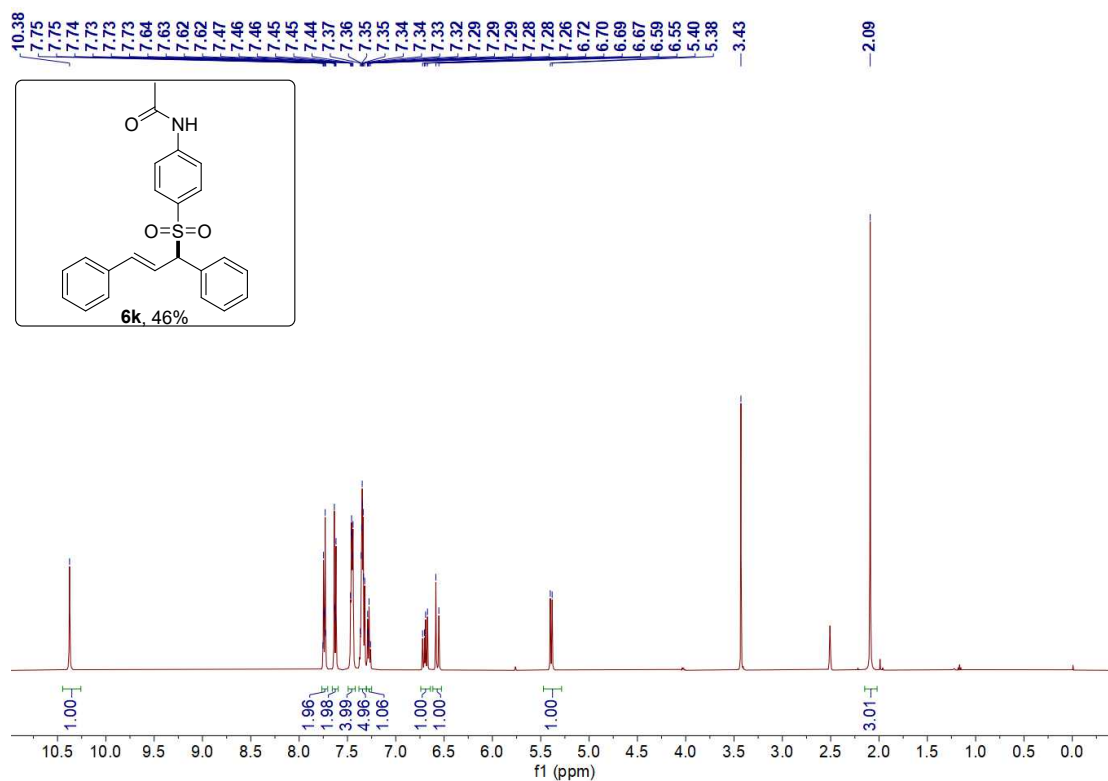

<sup>13</sup>C NMR (126 MHz, DMSO-d<sub>6</sub>)

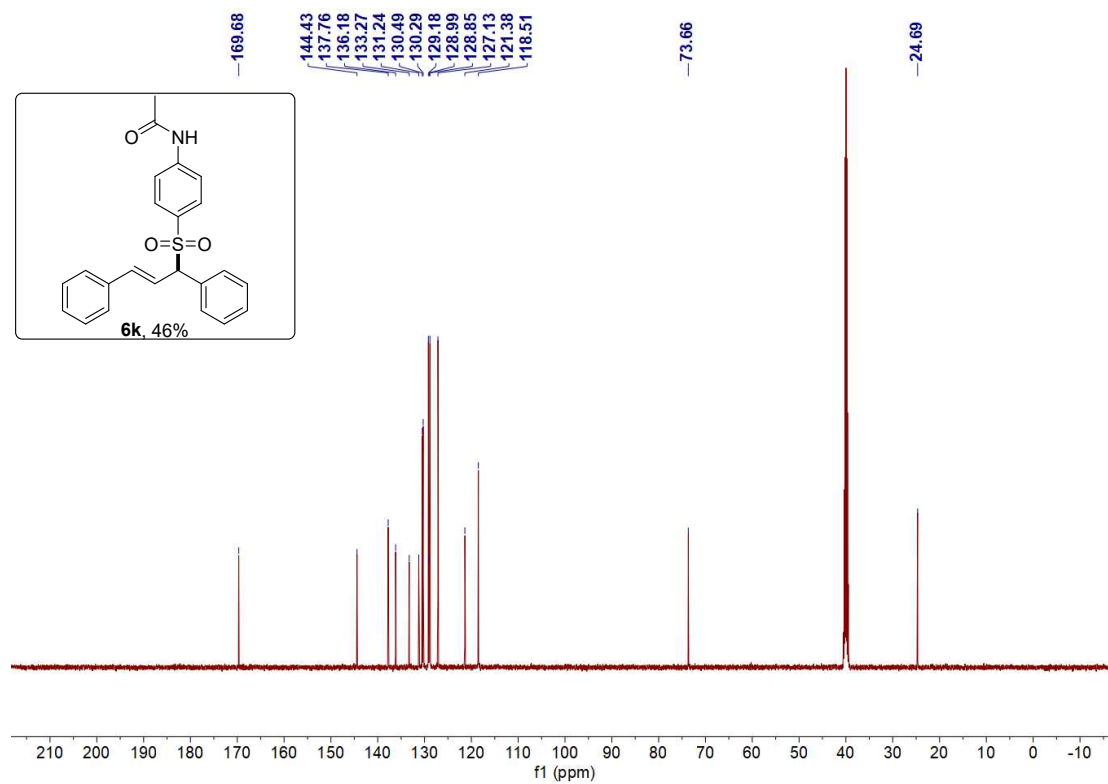

### (E)-(3-(ethylsulfonyl)prop-1-ene-1,3-diyl)dibenzene (6I)

<sup>1</sup>H NMR (500 MHz, Chloroform-d)

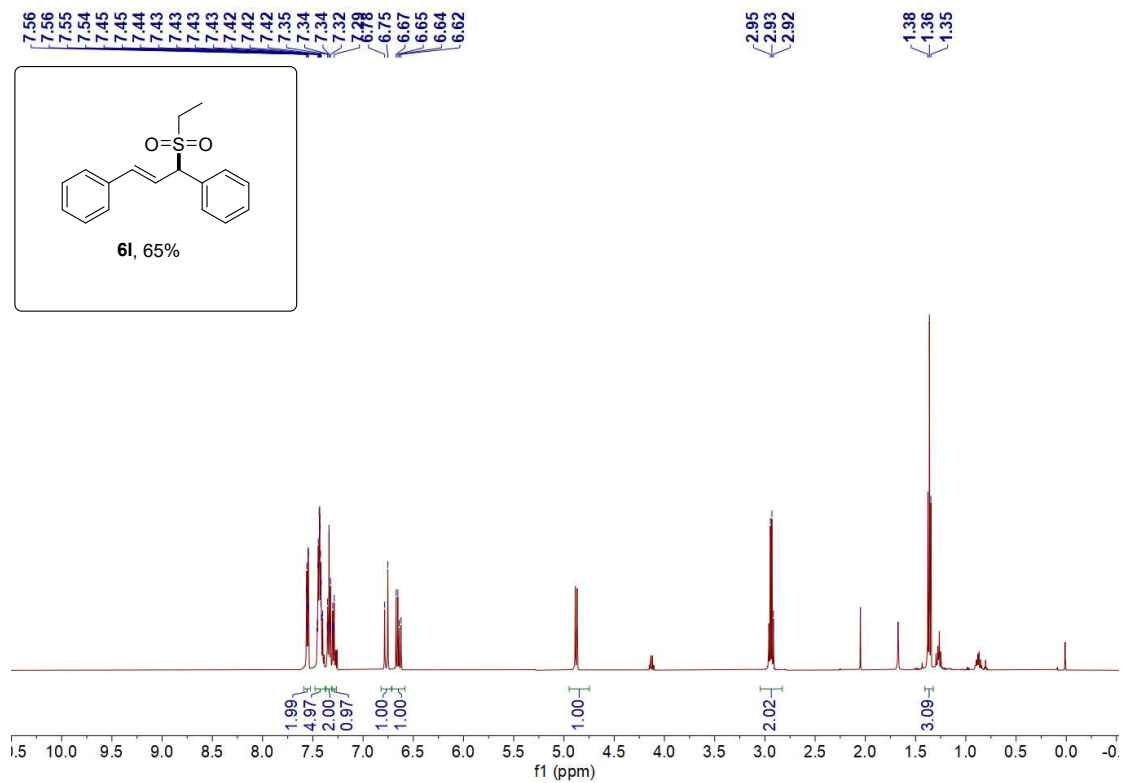

<sup>13</sup>C NMR (126 MHz, Chloroform-d)

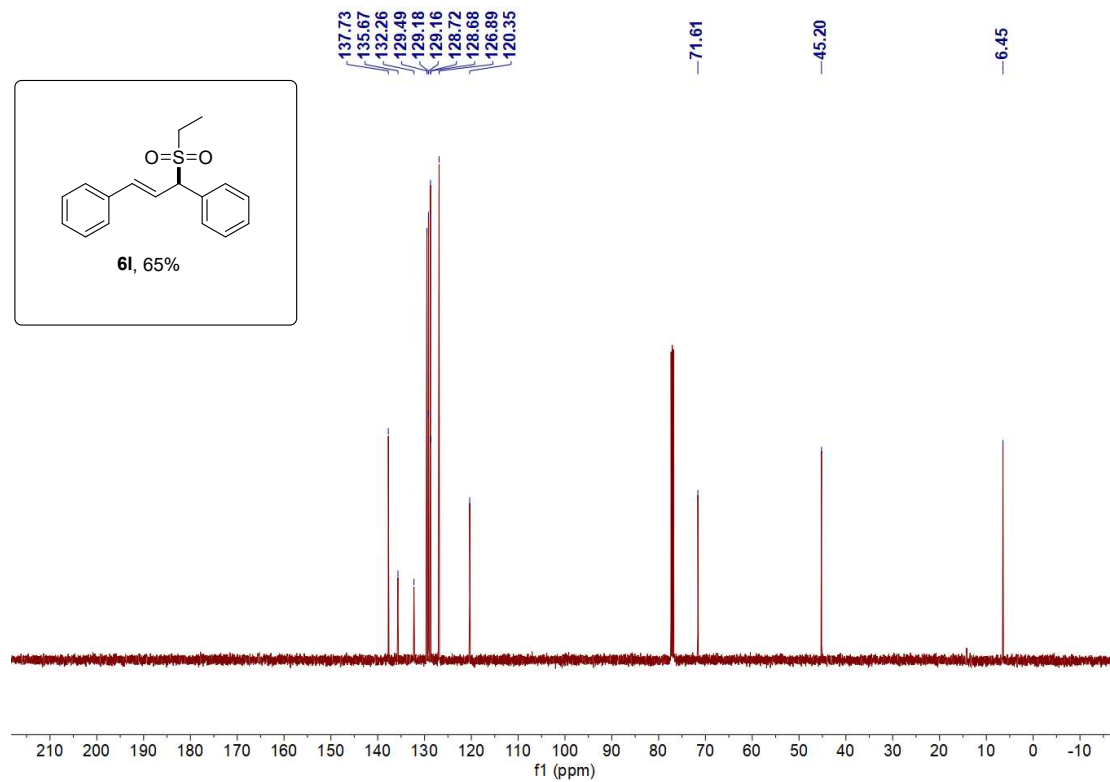

### (E)-(3-(cyclopropylsulfonyl)prop-1-ene-1,3-diyl)dibenzene (6m)

<sup>1</sup>H NMR (500 MHz, Chloroform-d)

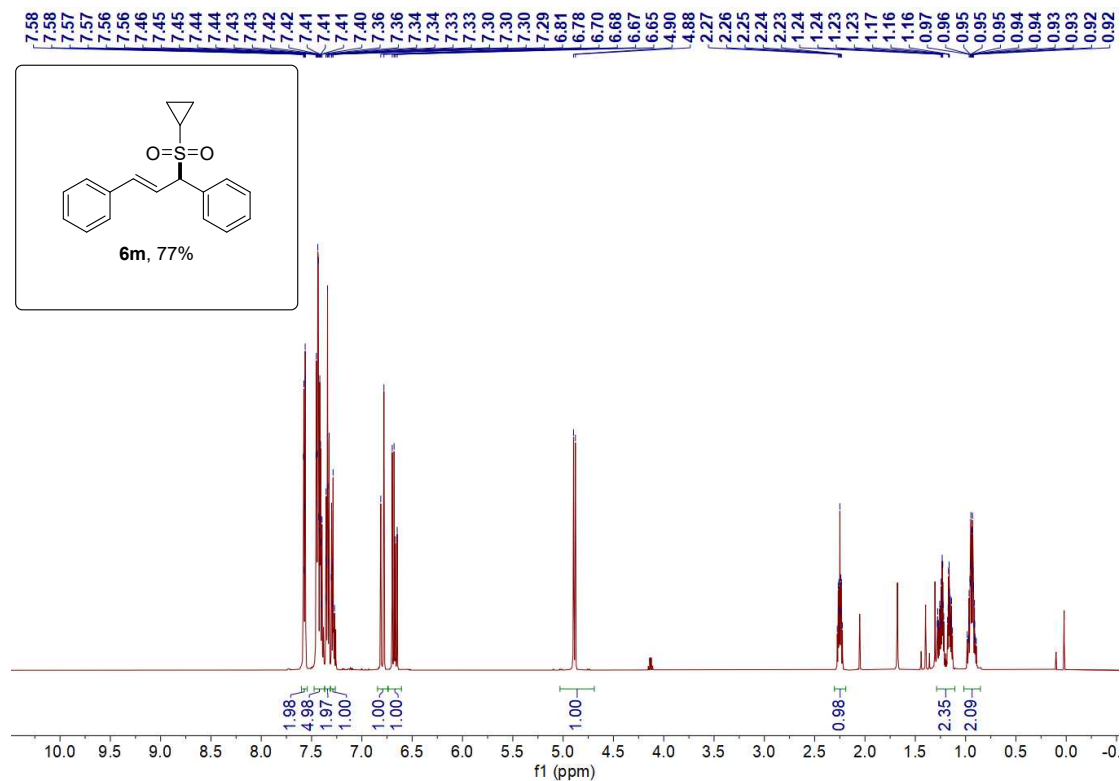

<sup>13</sup>C NMR (126 MHz, Chloroform-d)

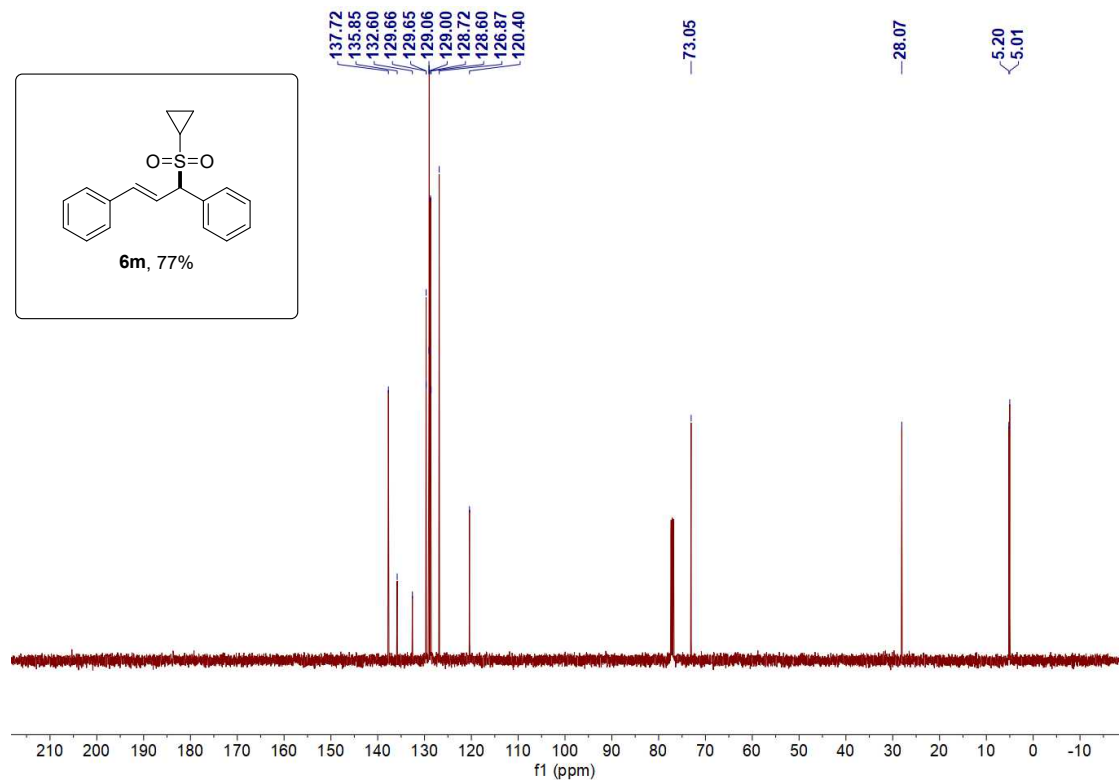

### (E)-2-((1,3-diphenylallyl)sulfonyl)naphthalene (6n)

<sup>1</sup>H NMR (500 MHz, Chloroform-d)

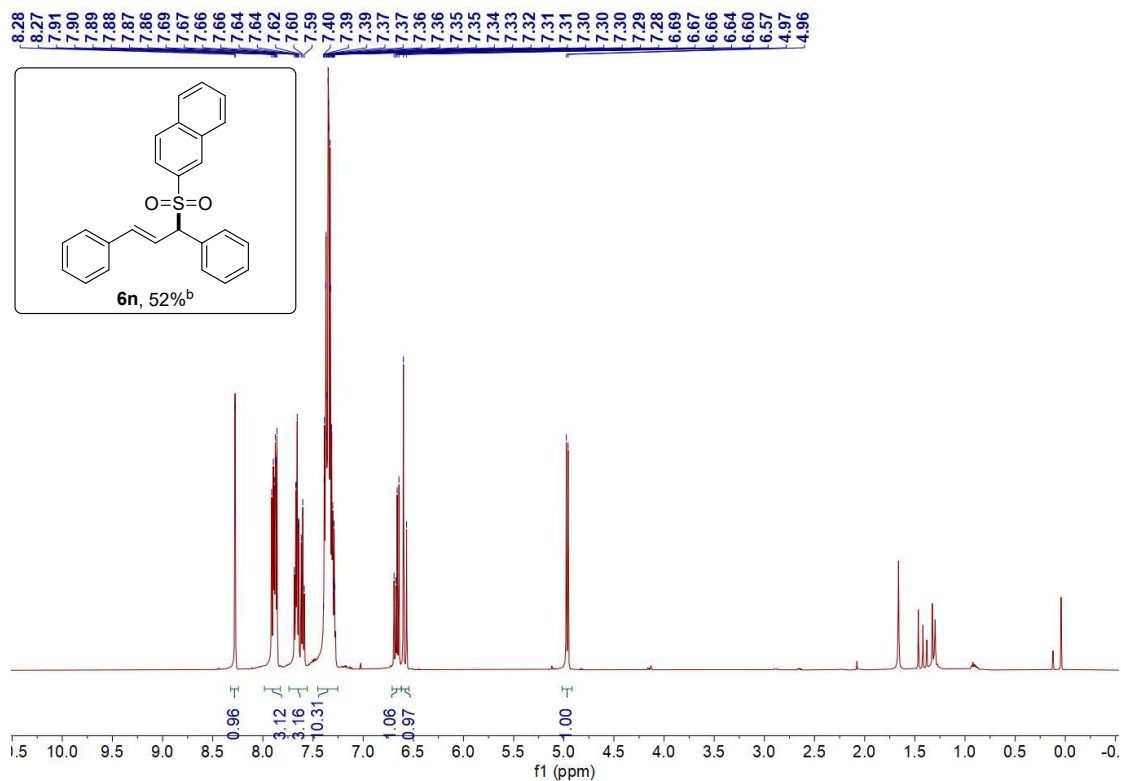

<sup>13</sup>C NMR (126 MHz, Chloroform-d)

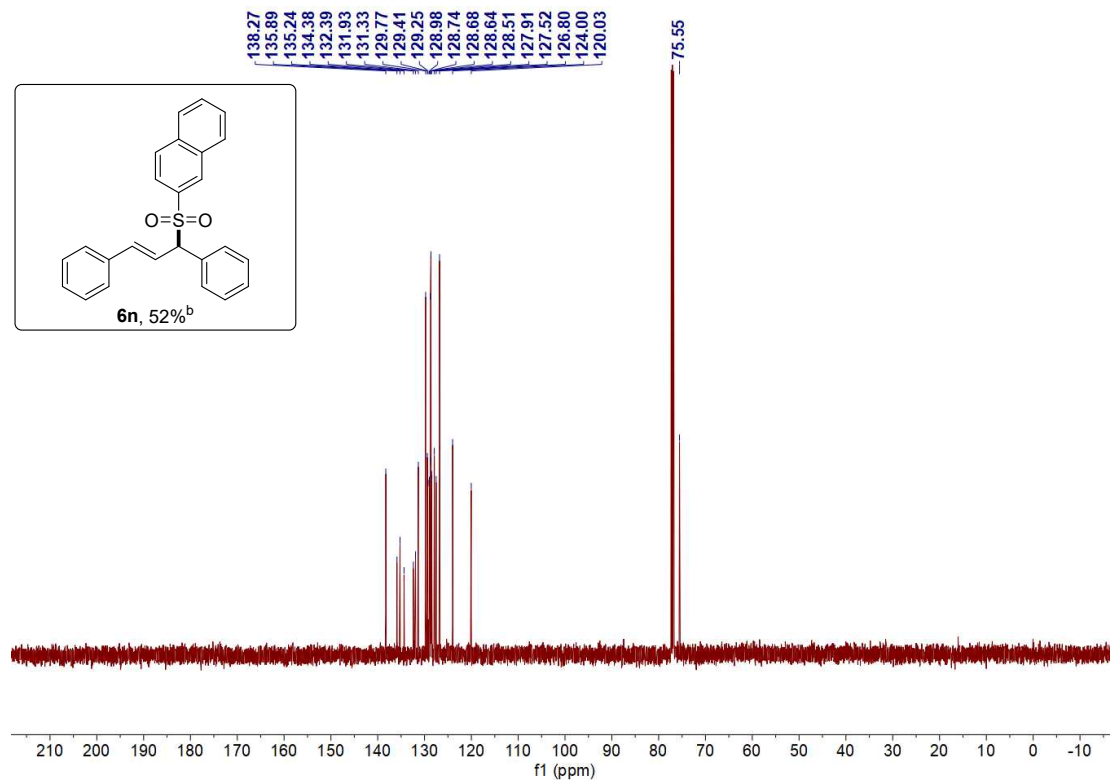

### (E)-2-((1,3-diphenylallyl)sulfonyl)thiophene (6o)

**<sup>1</sup>H NMR (500 MHz, Chloroform-d)**

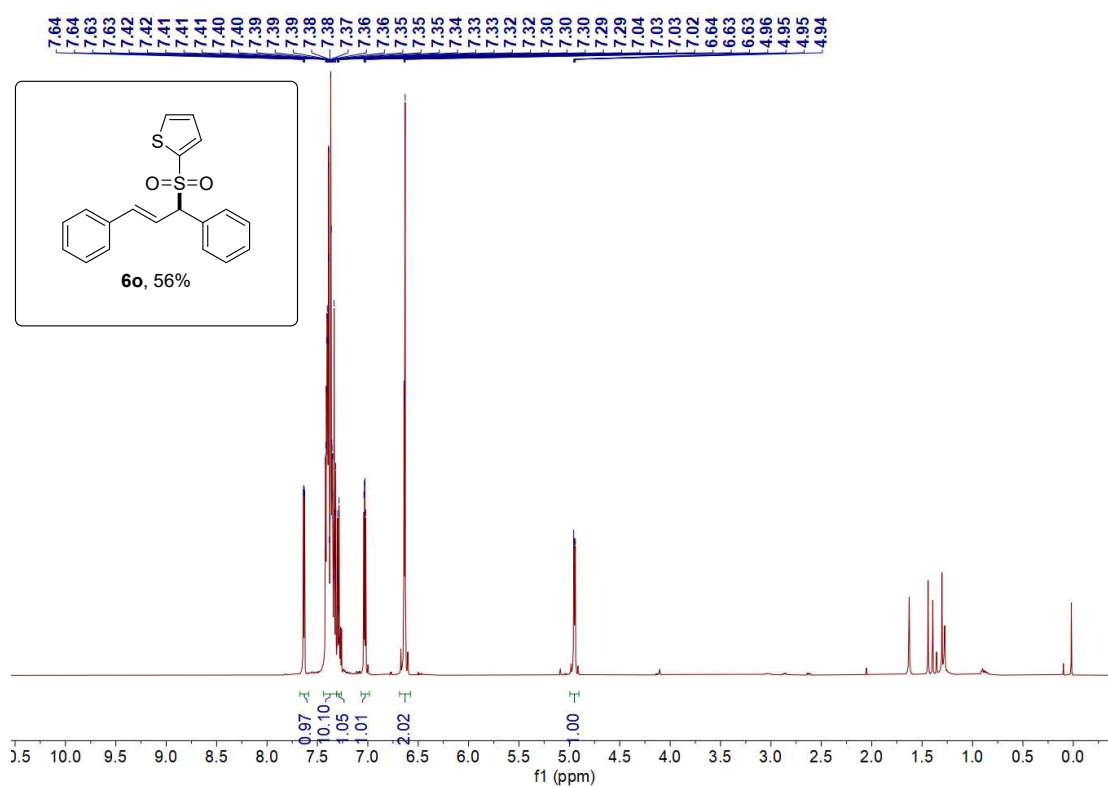

**<sup>13</sup>C NMR (126 MHz, Chloroform-d)**

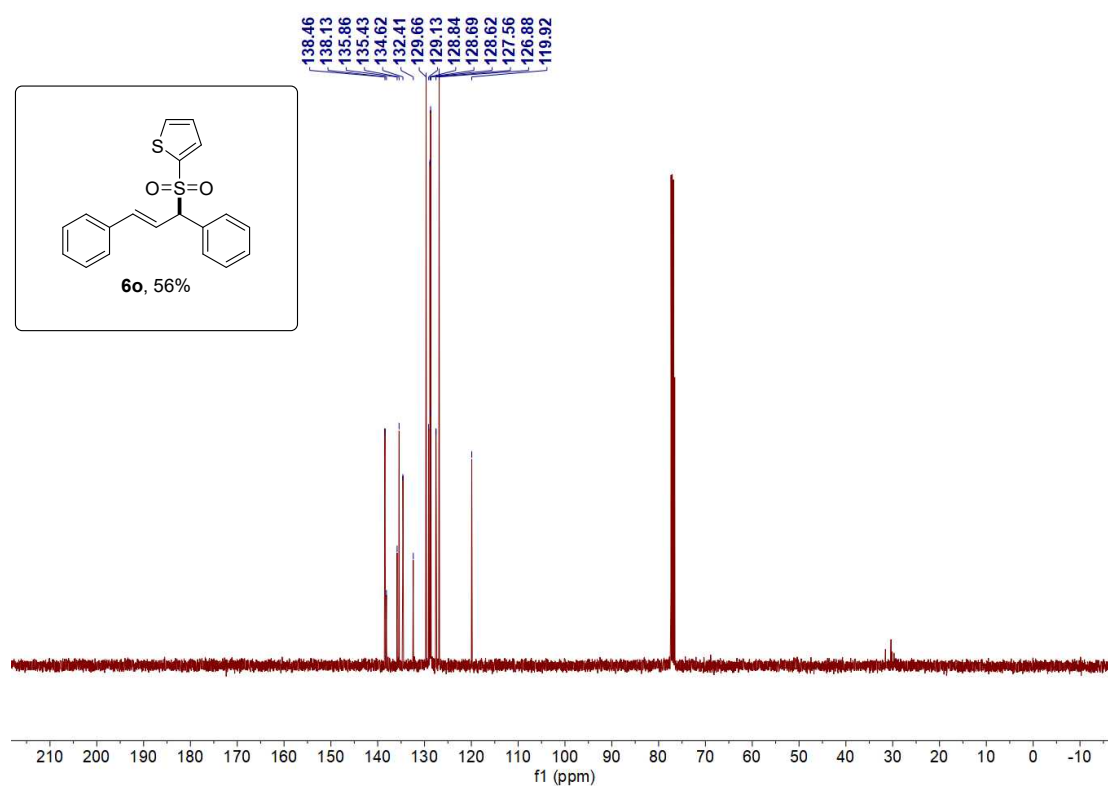

**diethyl (E)-(1,3-bis(4-fluorophenyl)allyl)phosphonate (7a)**

**<sup>1</sup>H NMR (500 MHz, Chloroform-d)**

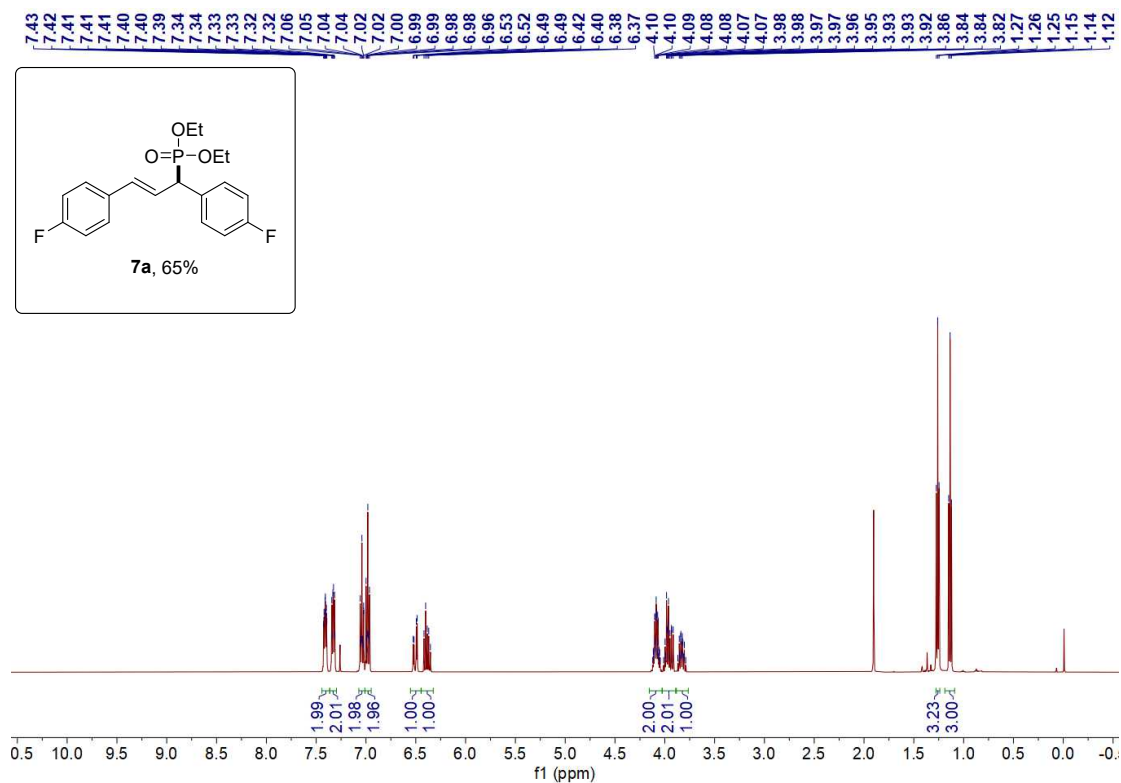

**<sup>13</sup>C NMR (126 MHz, Chloroform-d)**

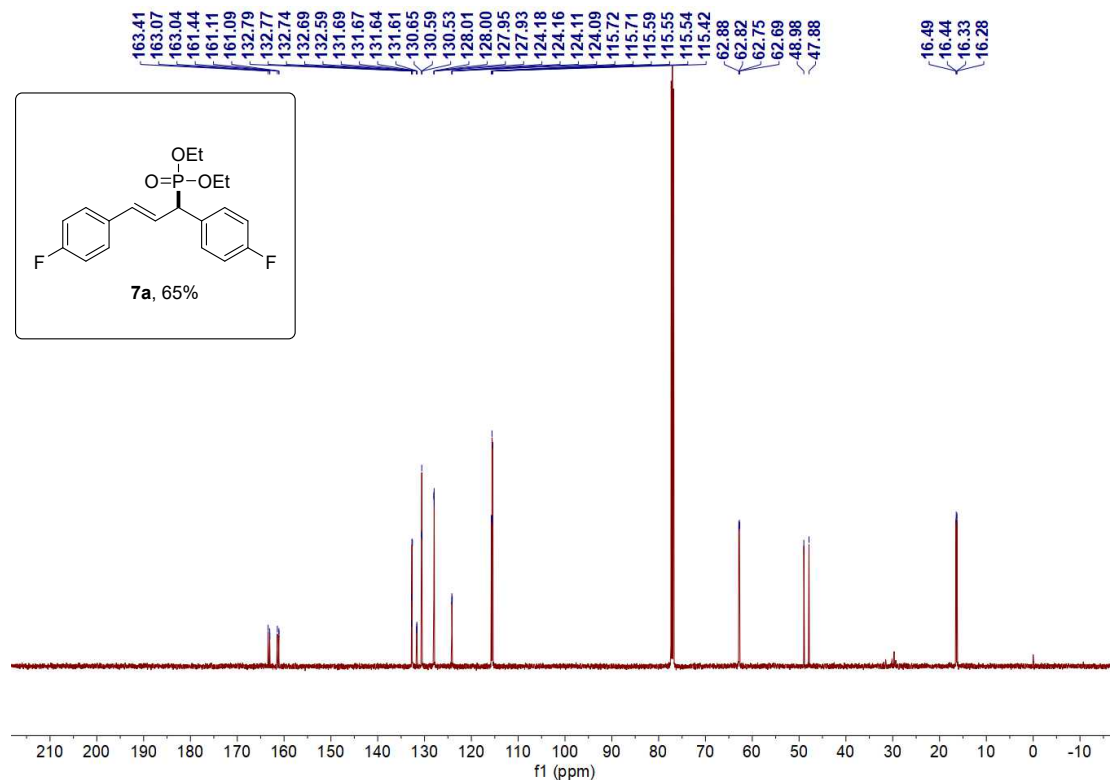

**<sup>31</sup>P NMR (202 MHz, Chloroform-d)**

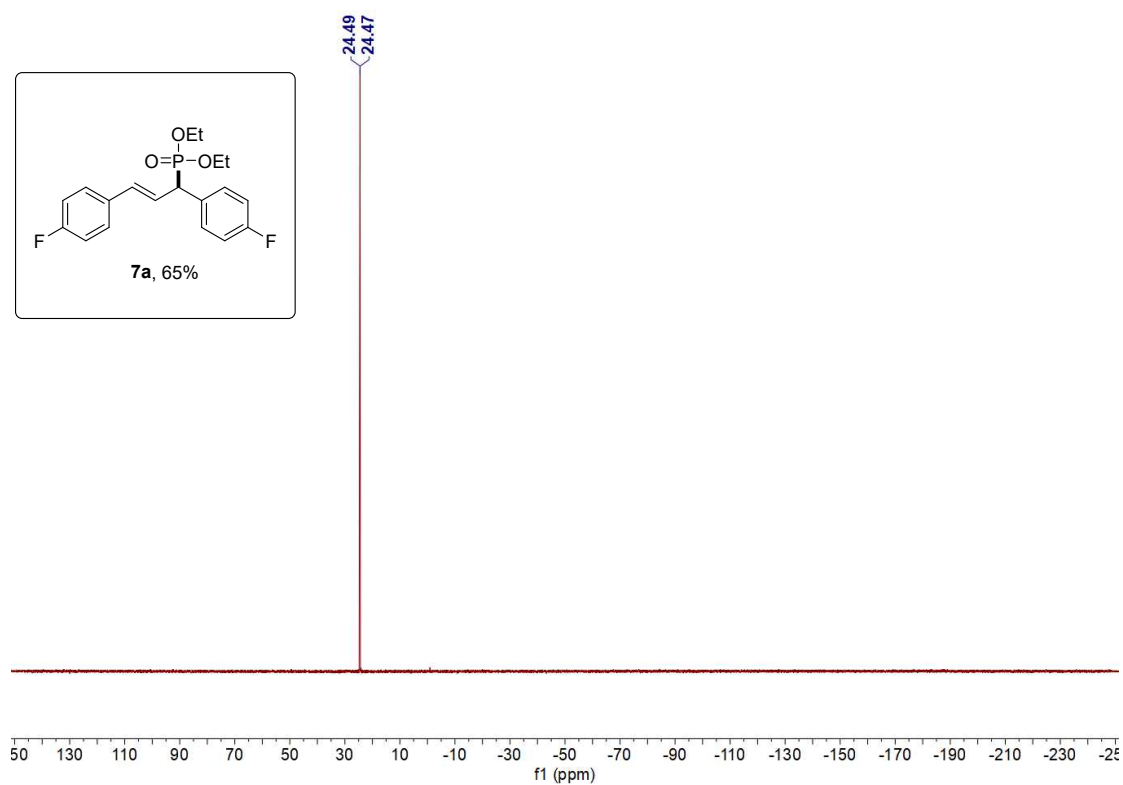

**<sup>19</sup>F NMR (471 MHz, Chloroform-d)**

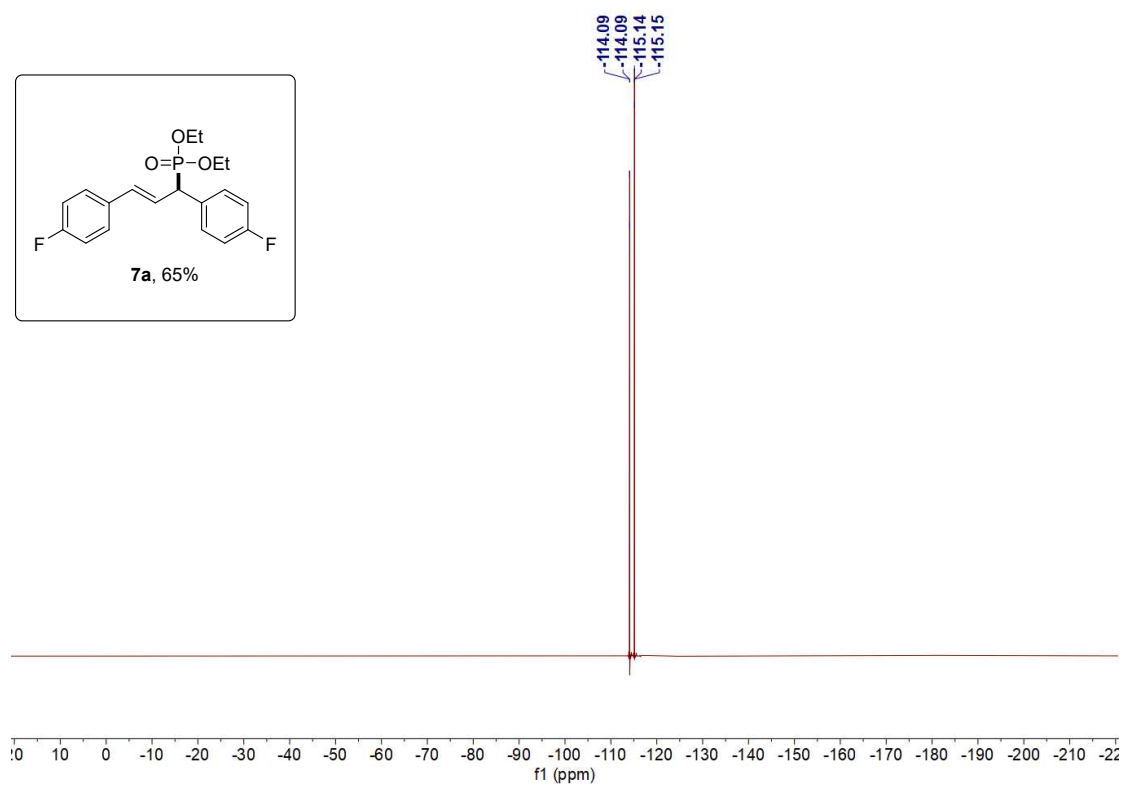



## diethyl (E)-(1,3-bis(4-chlorophenyl)allyl)phosphonate (7b)

<sup>1</sup>H NMR (500 MHz, Chloroform-d)

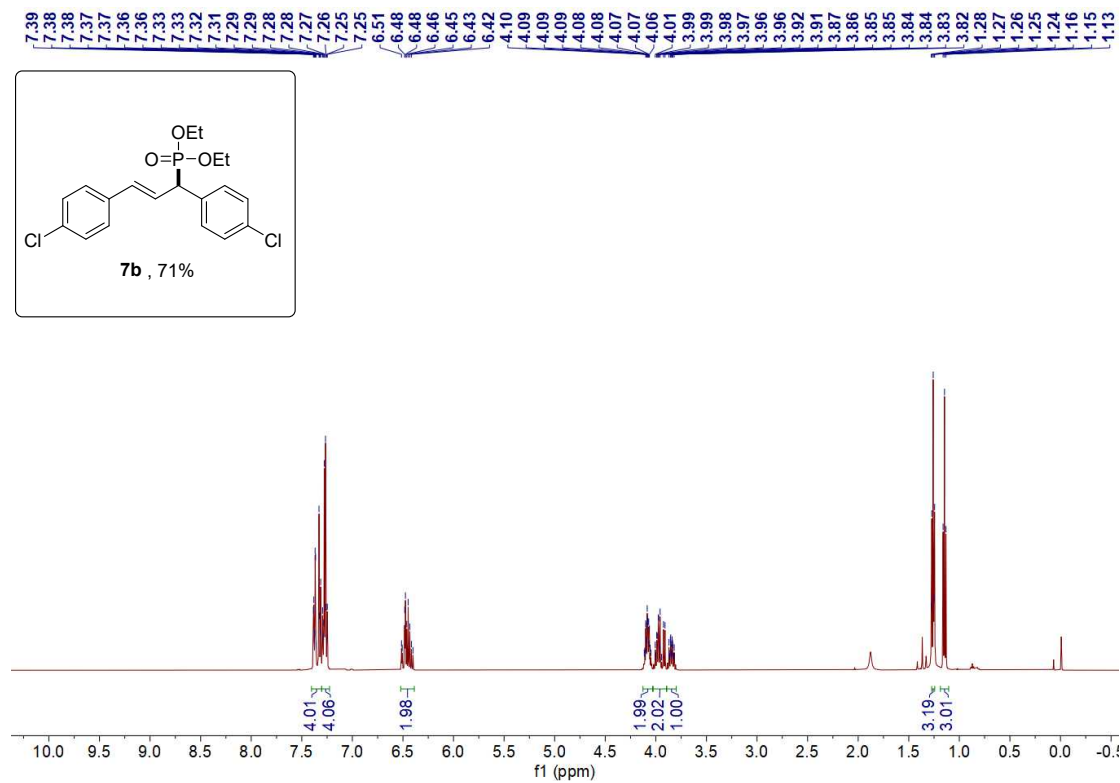

<sup>13</sup>C NMR (126 MHz, Chloroform-d)

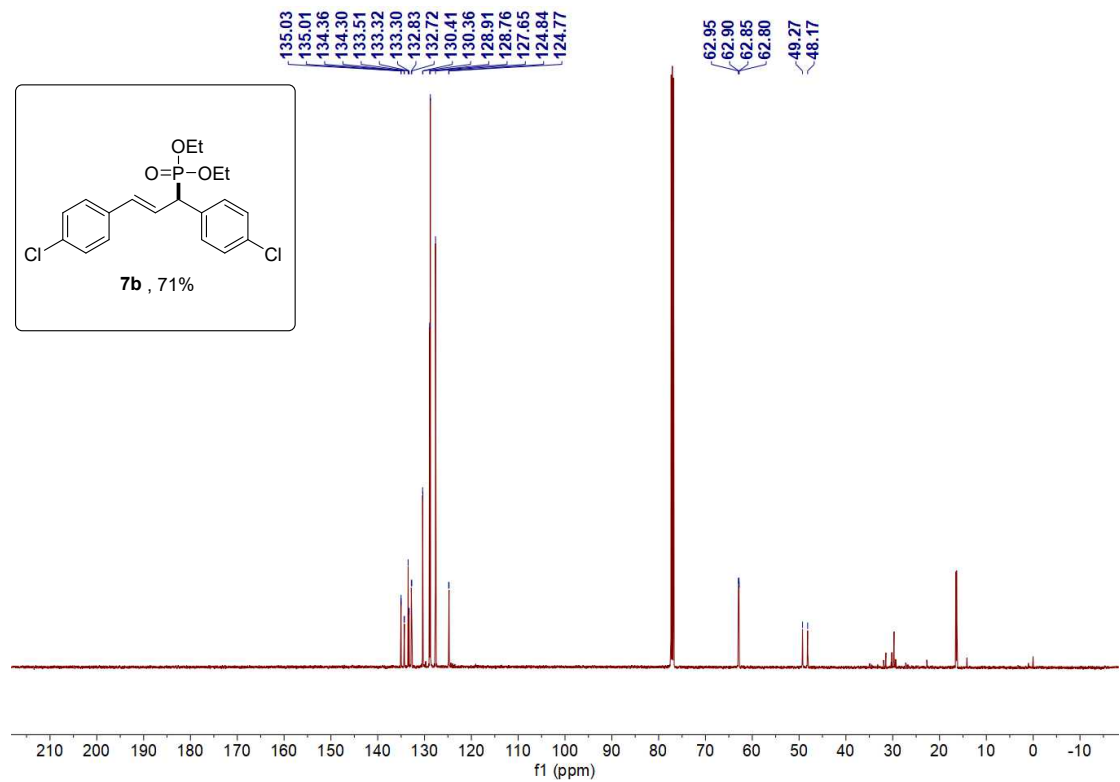

**<sup>31</sup>P NMR (202 MHz, Chloroform-d)**

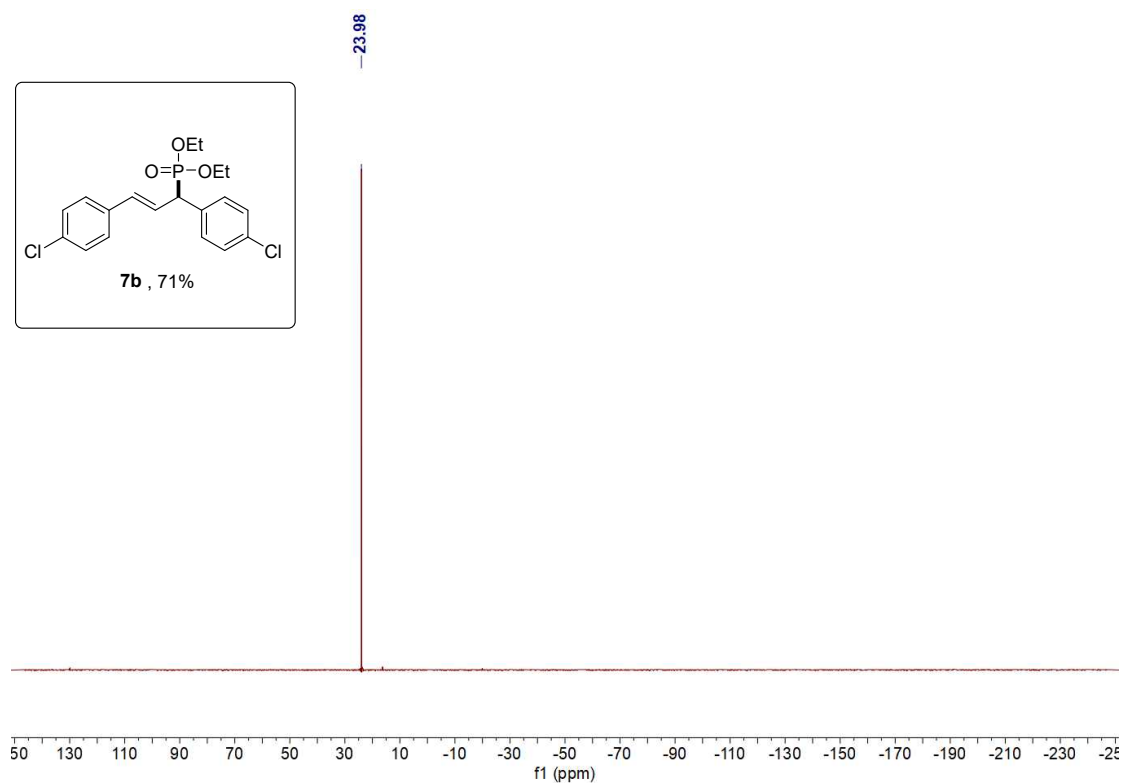

**diethyl (E)-(1,3-bis(4-bromophenyl)allyl)phosphonate (7c)**

**<sup>1</sup>H NMR (500 MHz, Chloroform-d)**

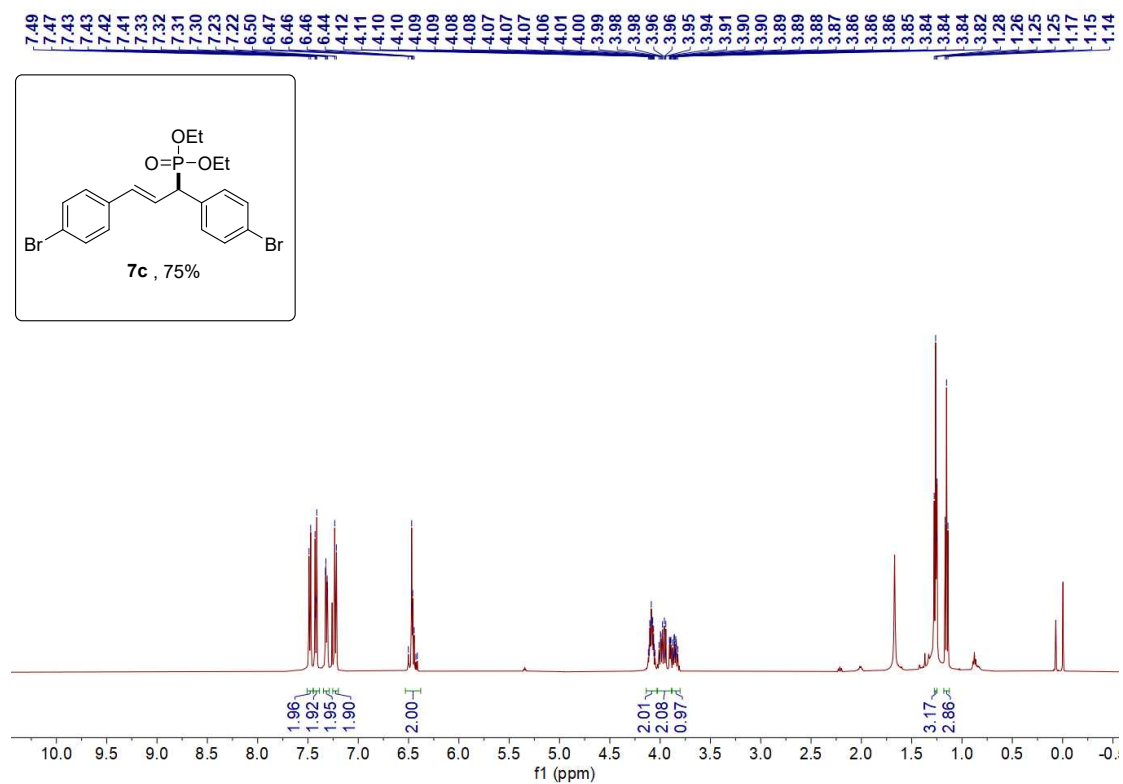

**<sup>13</sup>C NMR (126 MHz, Chloroform-d)**

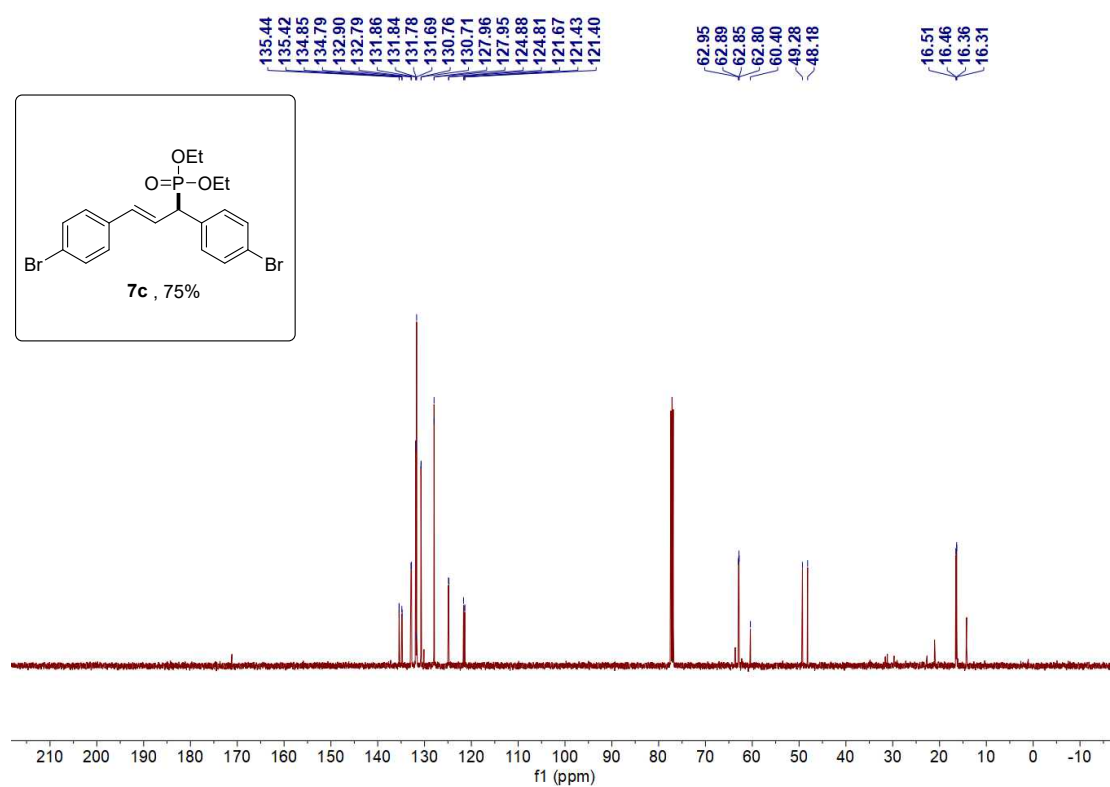

**<sup>31</sup>P NMR (202 MHz, Chloroform-d)**

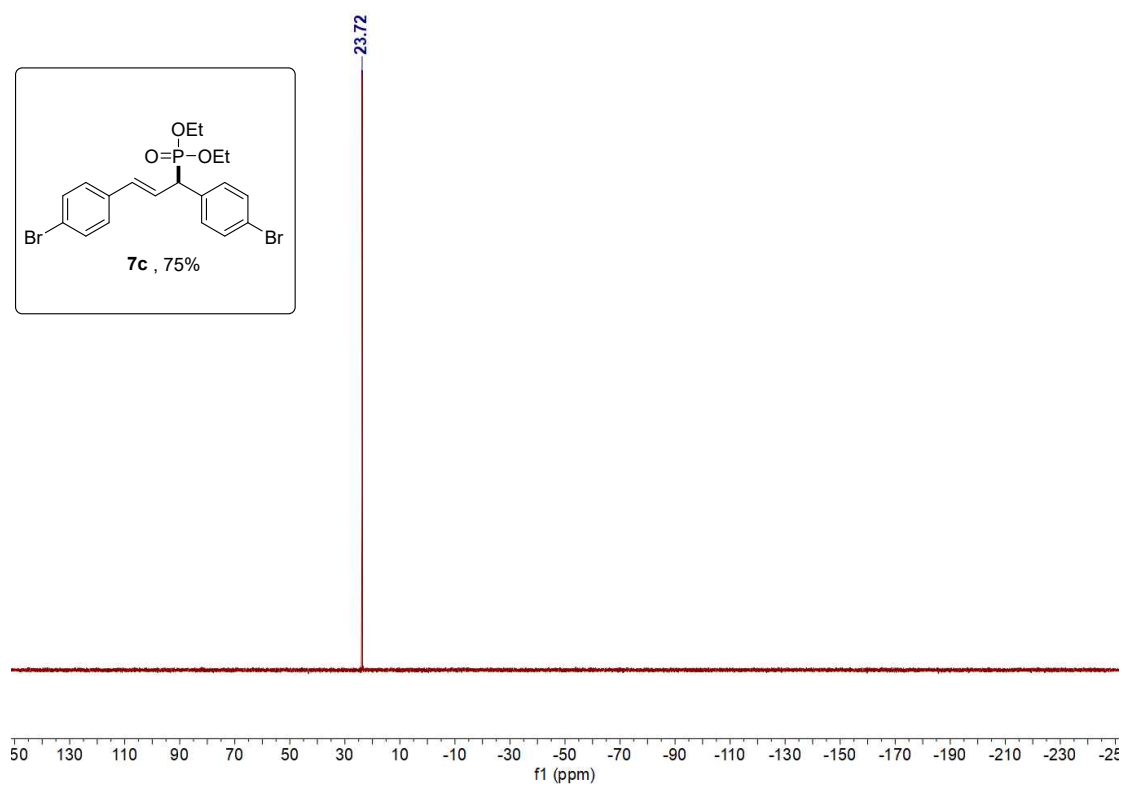

# diethyl (E)-(1,3-bis(4-iodophenyl)allyl)phosphonate (7d)

<sup>1</sup>H NMR (500 MHz, Chloroform-d)

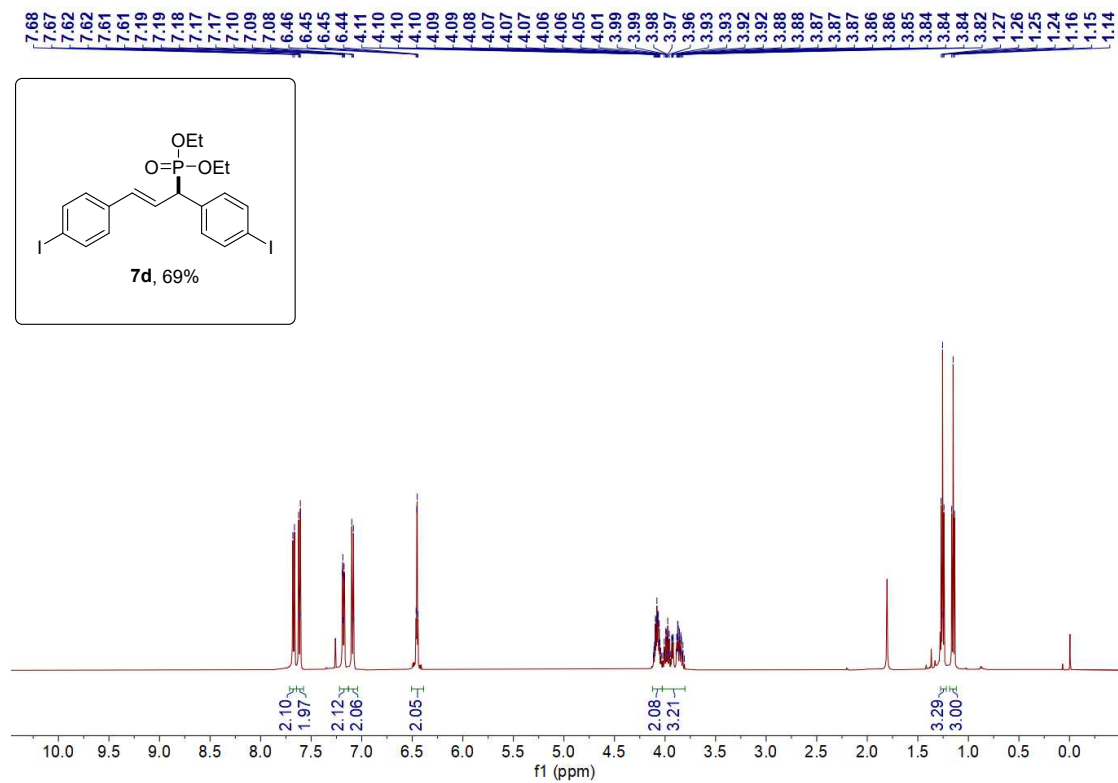

<sup>13</sup>C NMR (126 MHz, Chloroform-d)

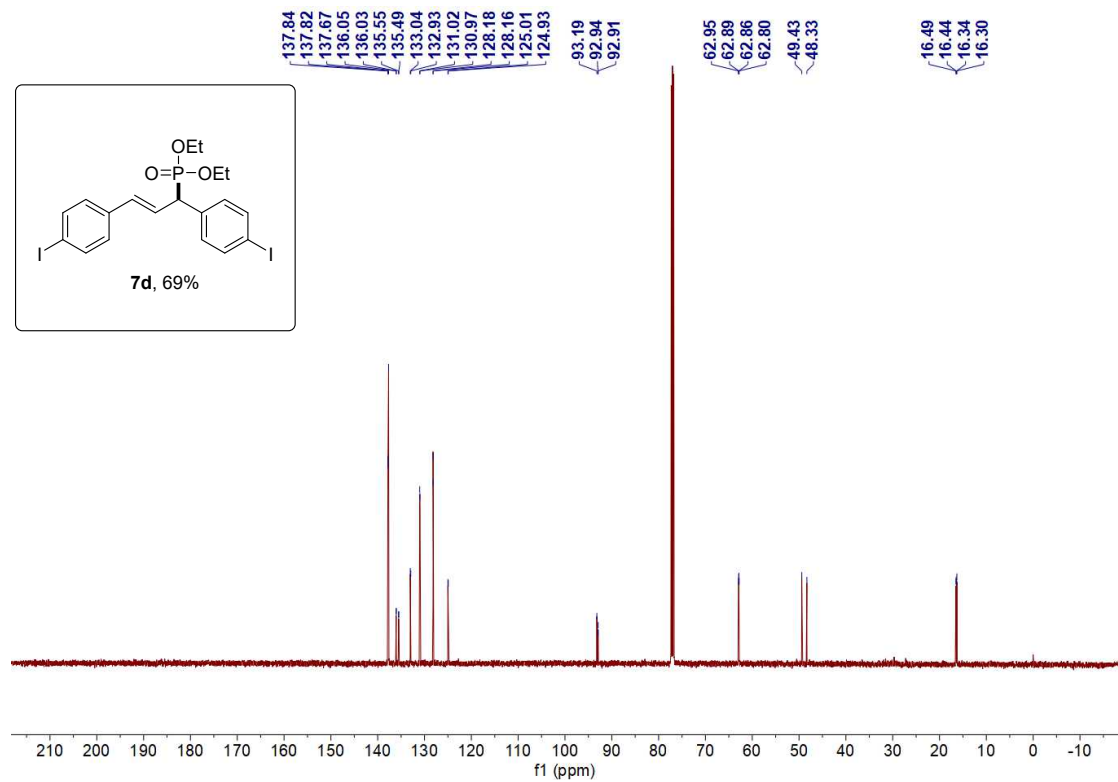

**<sup>31</sup>P NMR (202 MHz, Chloroform-d)**

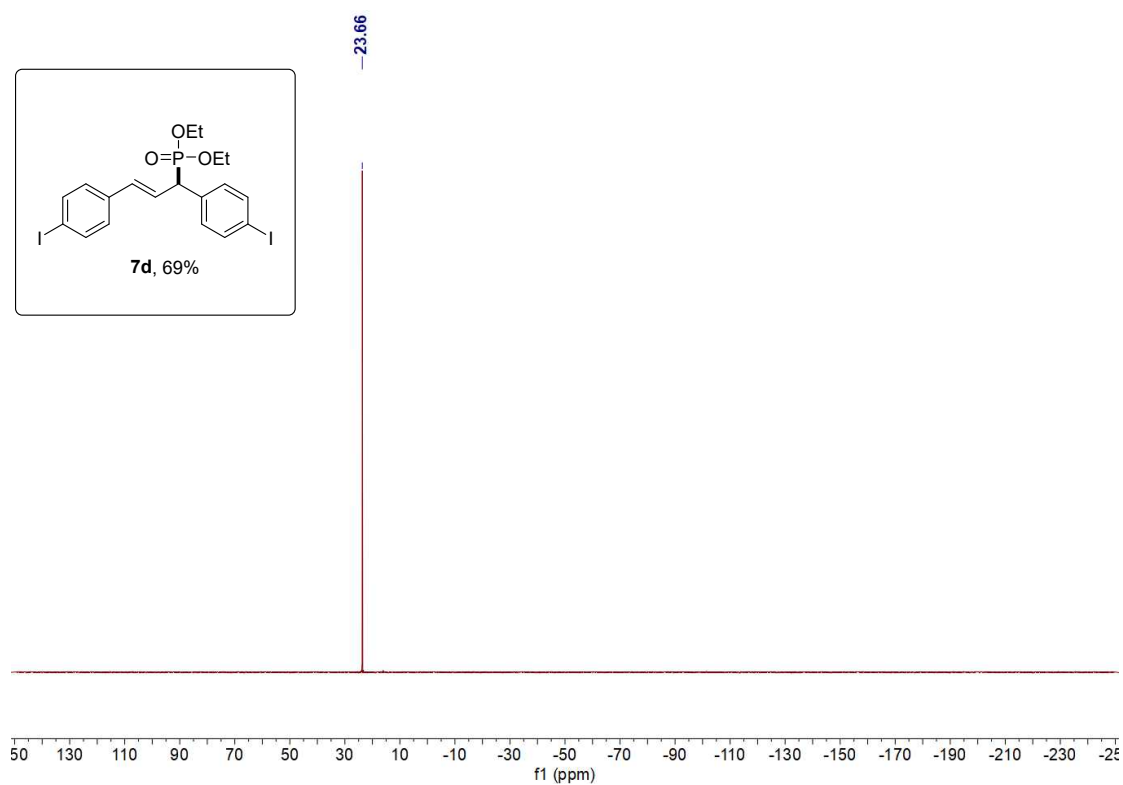

**diethyl ((2-phenyl-1H-indol-3-yl)methyl)phosphonate (7e)**

**<sup>1</sup>H NMR (500 MHz, Chloroform-d)**

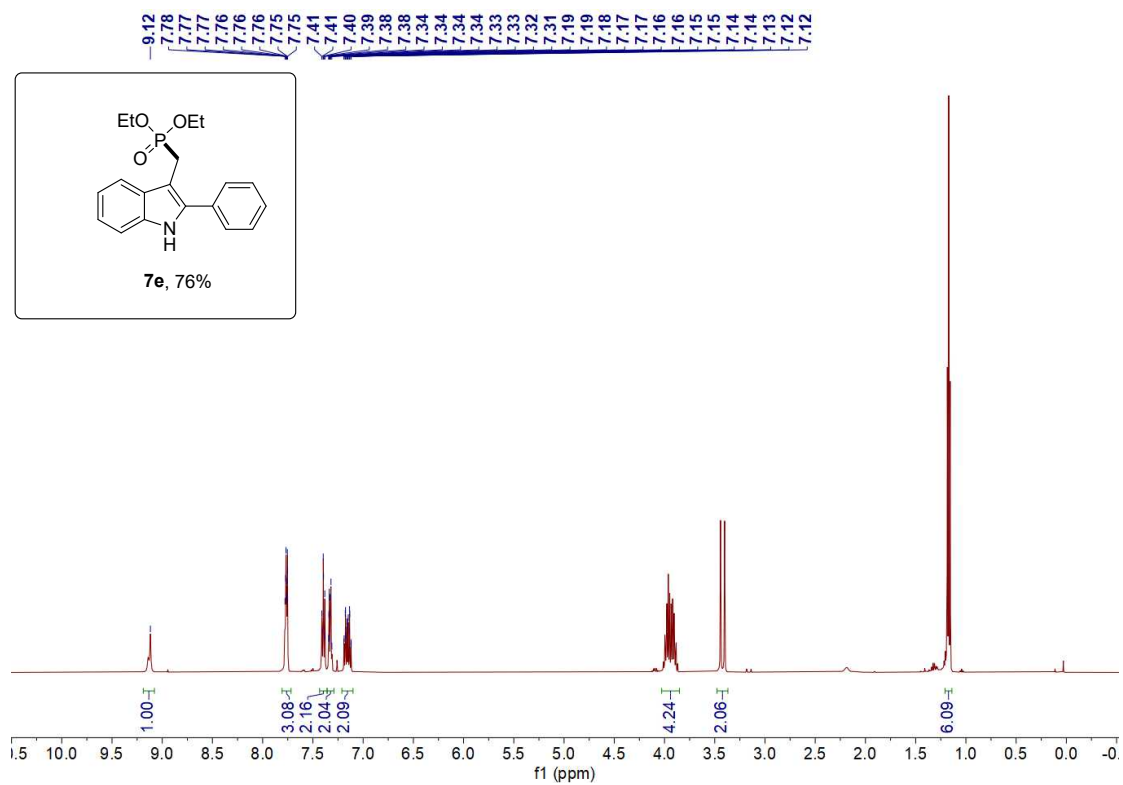

**<sup>13</sup>C NMR (126 MHz, Chloroform-d)**

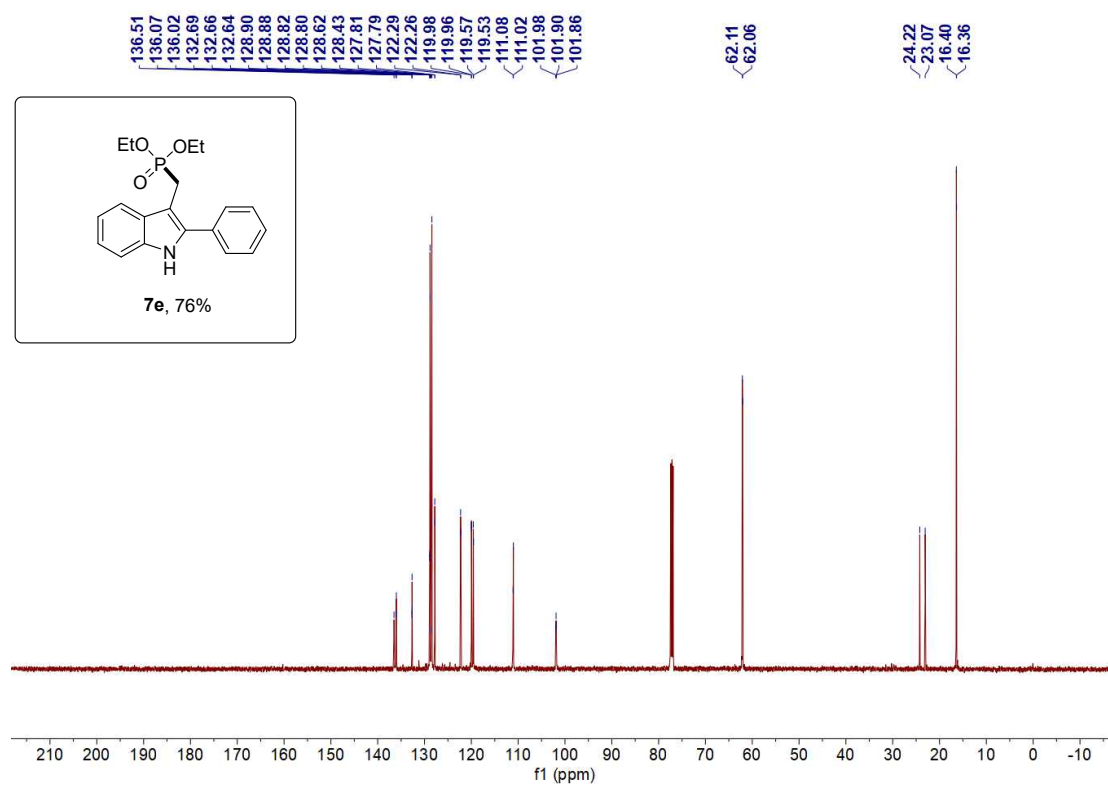

**<sup>31</sup>P NMR (202 MHz, Chloroform-d)**

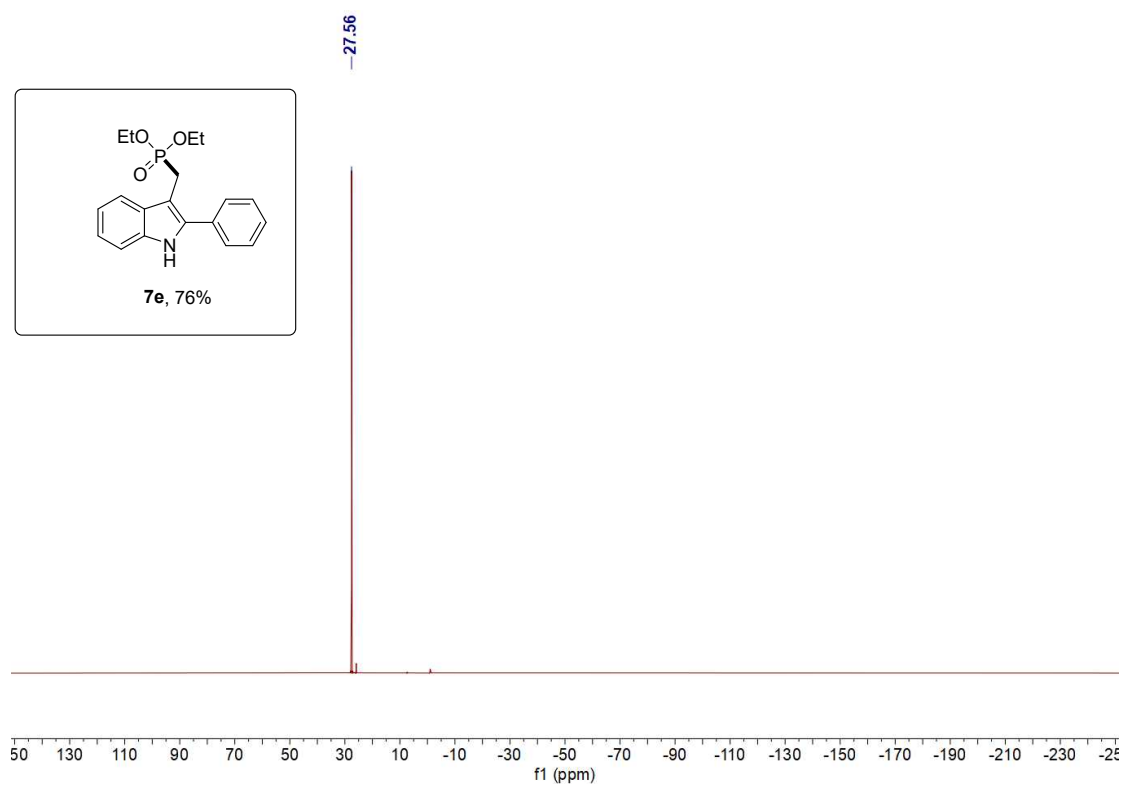

# diethyl (E)-(3-(4-ethylphenyl)-1-phenylallyl)phosphonate (7f)

<sup>1</sup>H NMR (500 MHz, Chloroform-d)

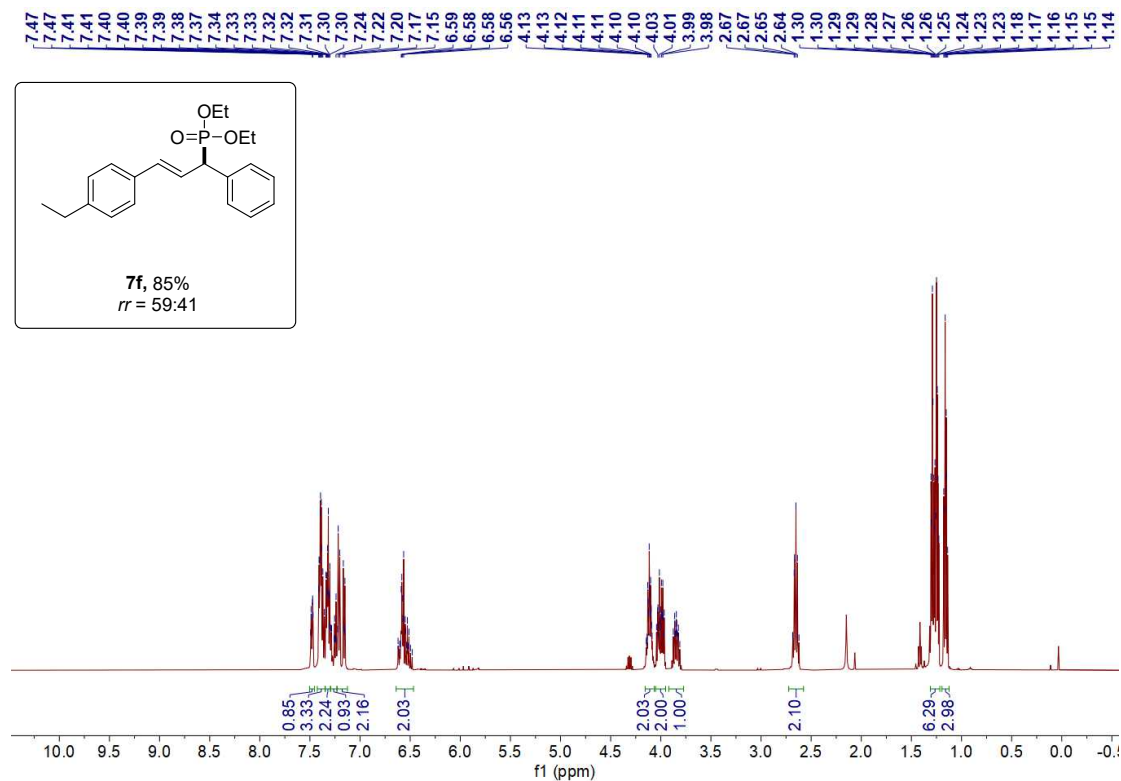

<sup>13</sup>C NMR (126 MHz, Chloroform-d)

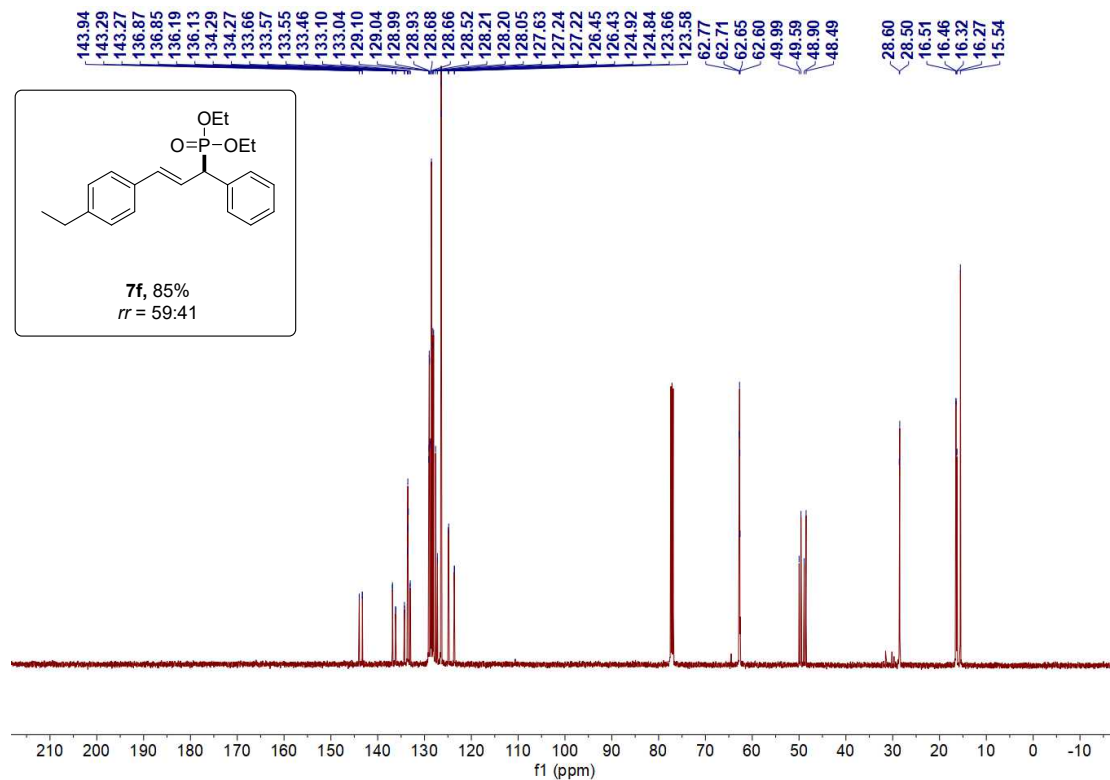

**<sup>31</sup>P NMR (202 MHz, Chloroform-d)**

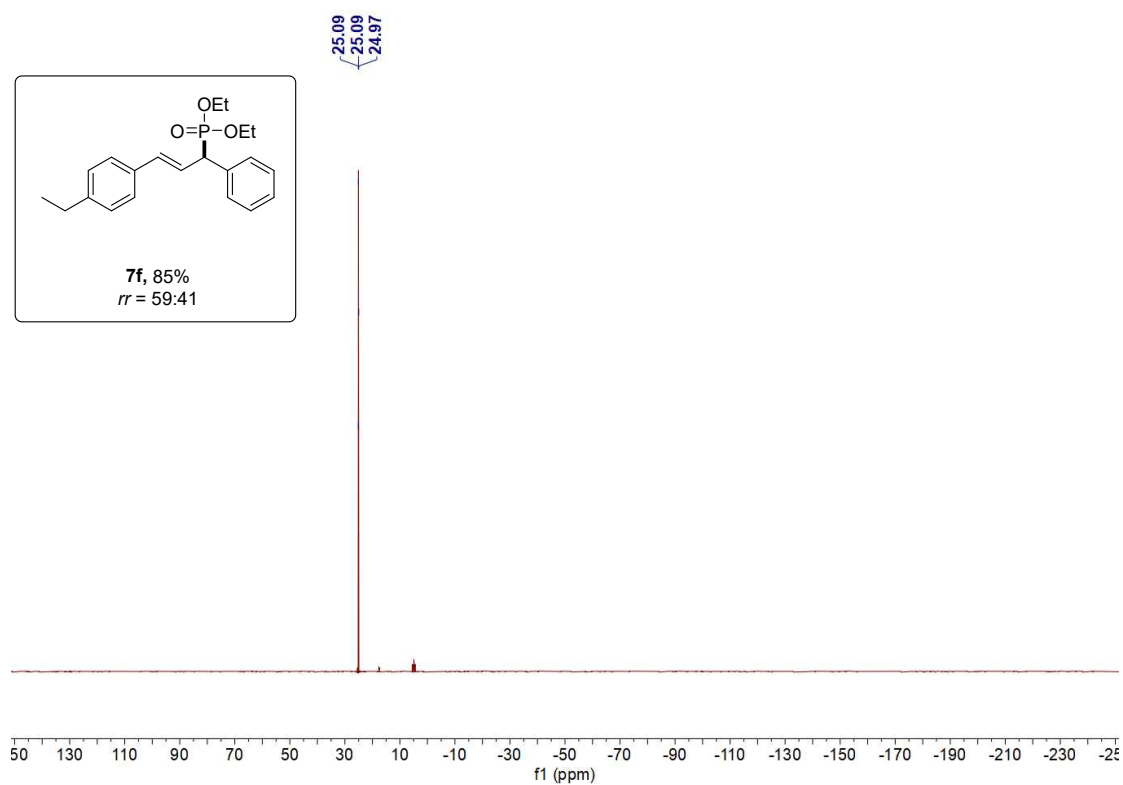

**diethyl (E)-3-(4-fluorophenyl)-1-(p-tolyl)allylphosphonate (7g)**

**<sup>1</sup>H NMR (500 MHz, Chloroform-d)**

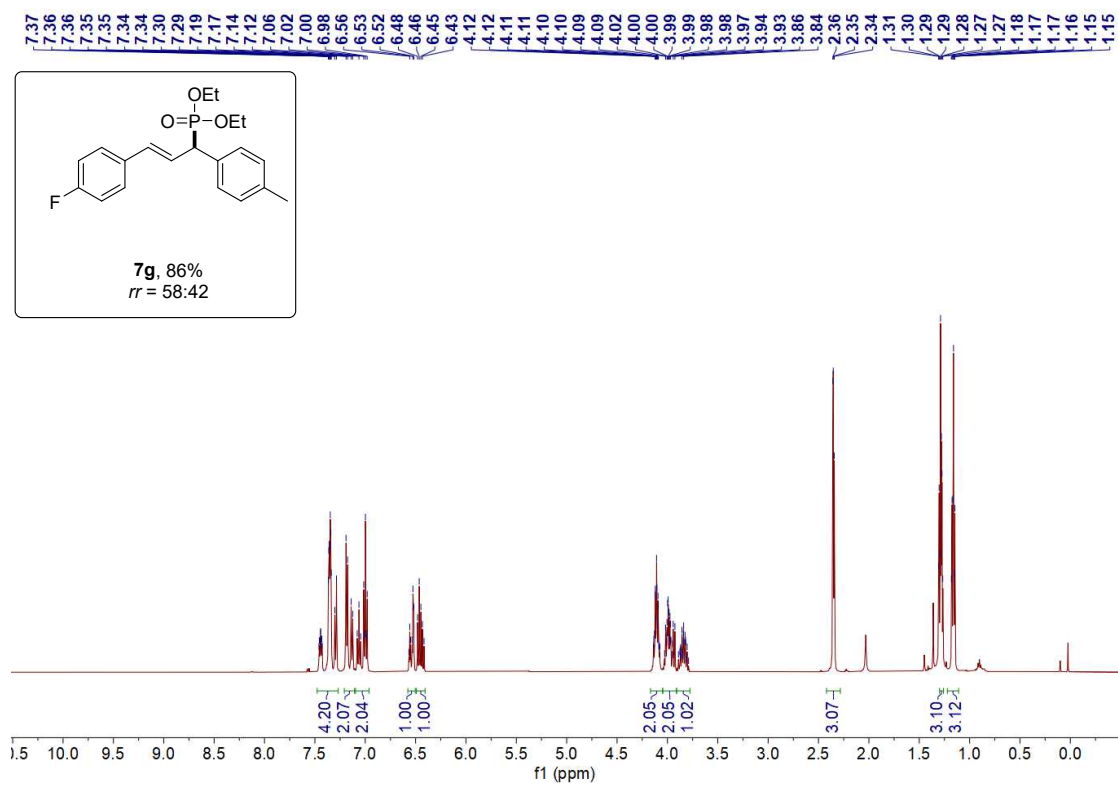



**<sup>13</sup>C NMR (126 MHz, Chloroform-d)**

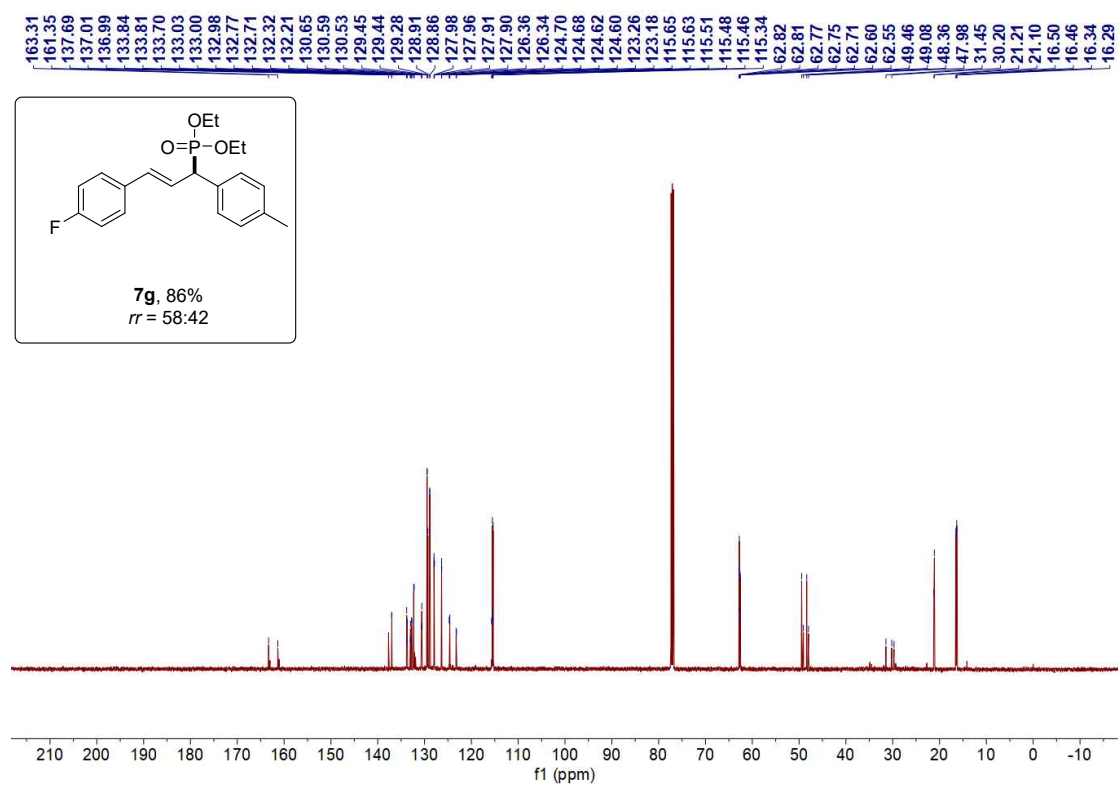

**<sup>31</sup>P NMR (202 MHz, Chloroform-d)**

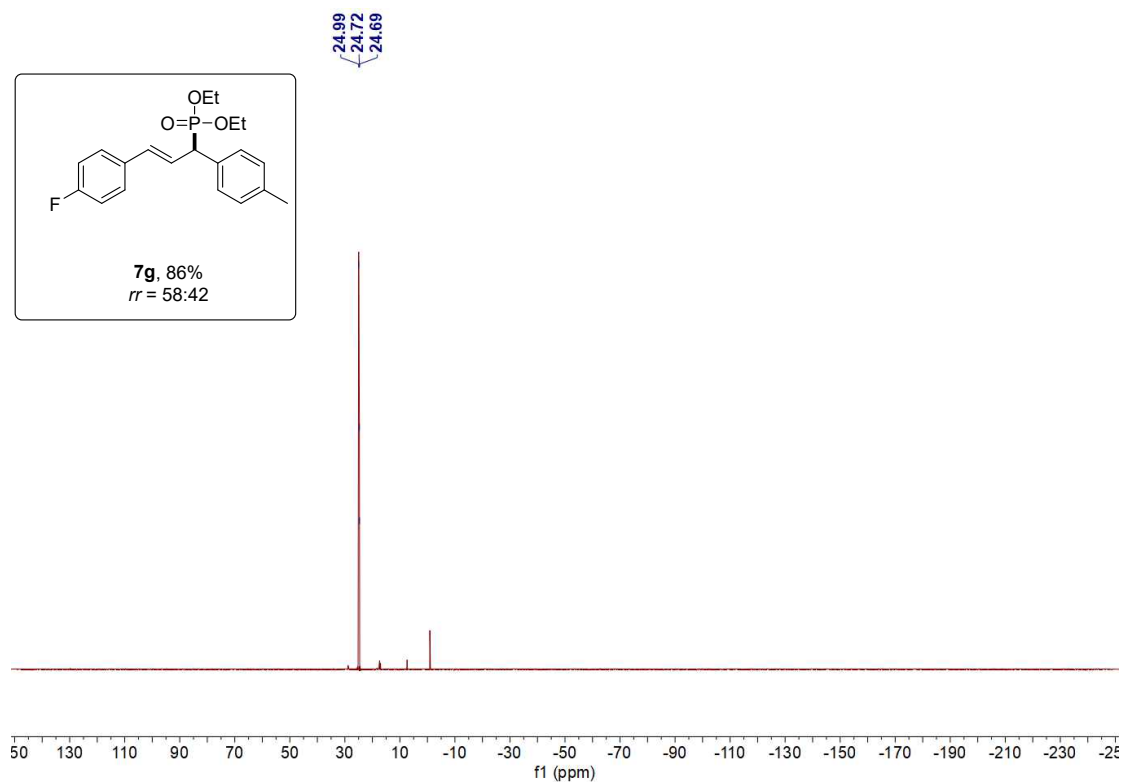

**<sup>19</sup>F NMR (471 MHz, Chloroform-d)**

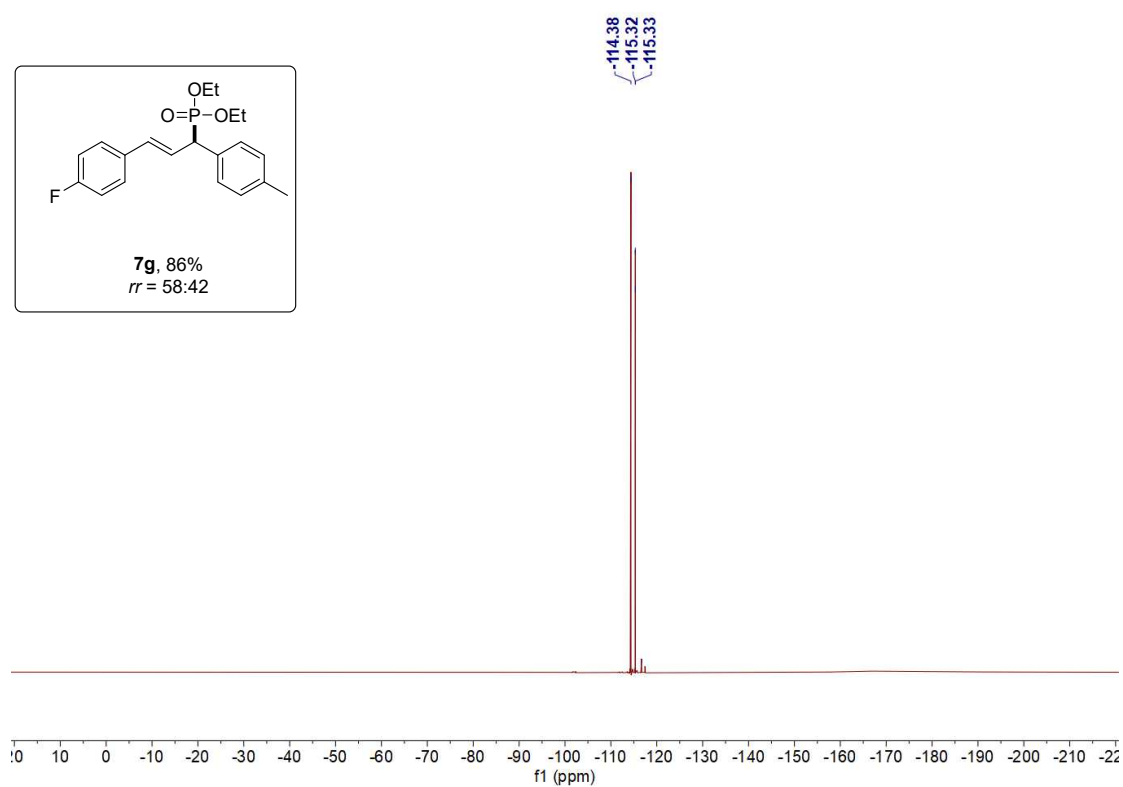

**diethyl (E)-3-(4-bromophenyl)-1-phenylallyl phosphonate (7h)**

**<sup>1</sup>H NMR (500 MHz, Chloroform-d)**

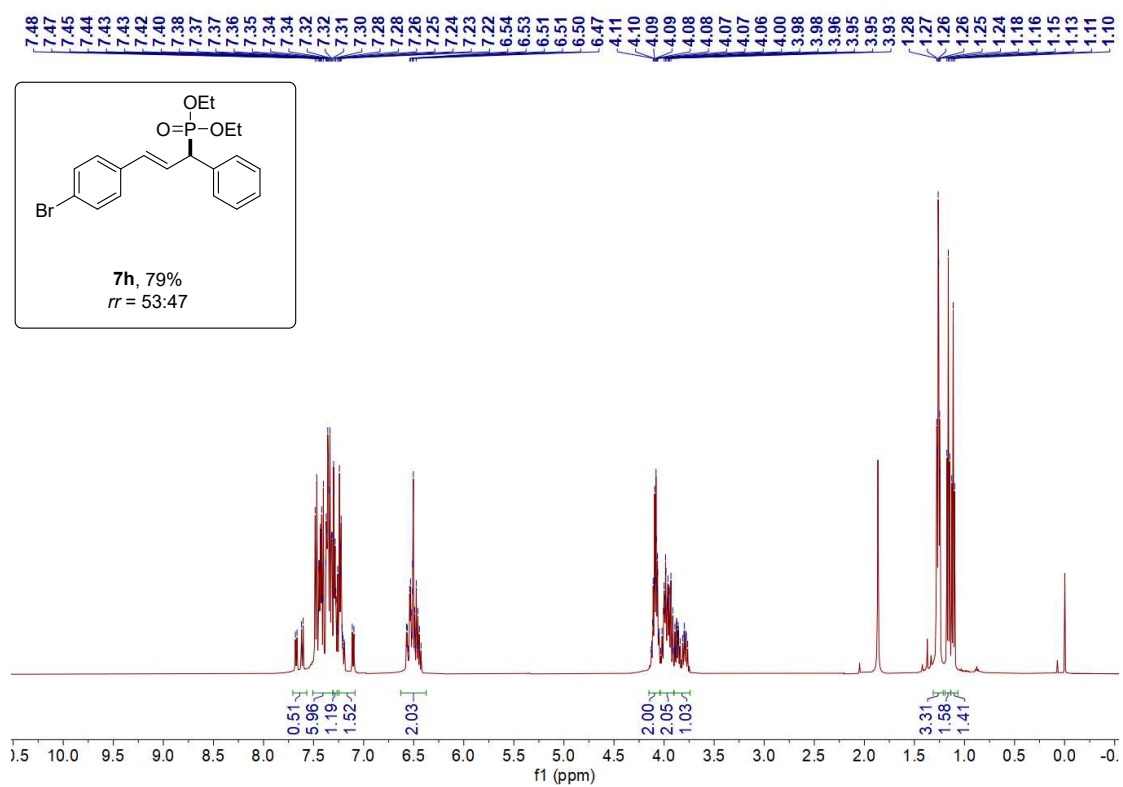

### <sup>13</sup>C NMR (126 MHz, Chloroform-d)

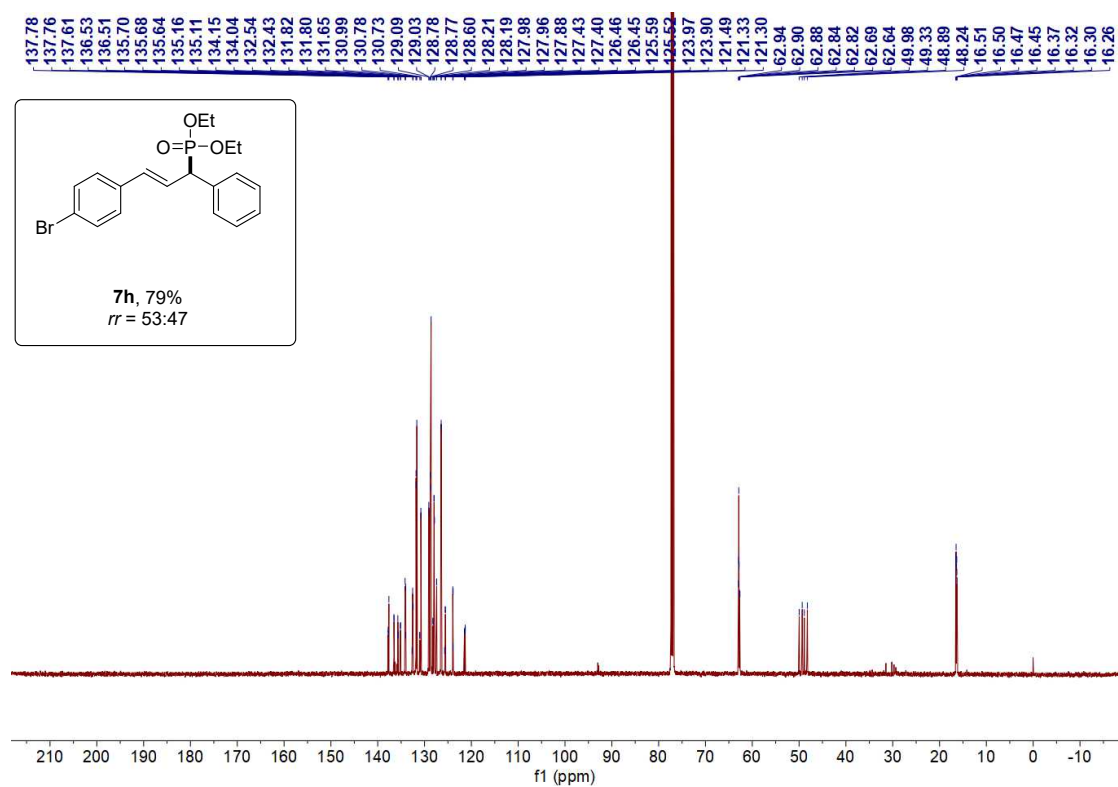

### <sup>31</sup>P NMR (202 MHz, Chloroform-d)

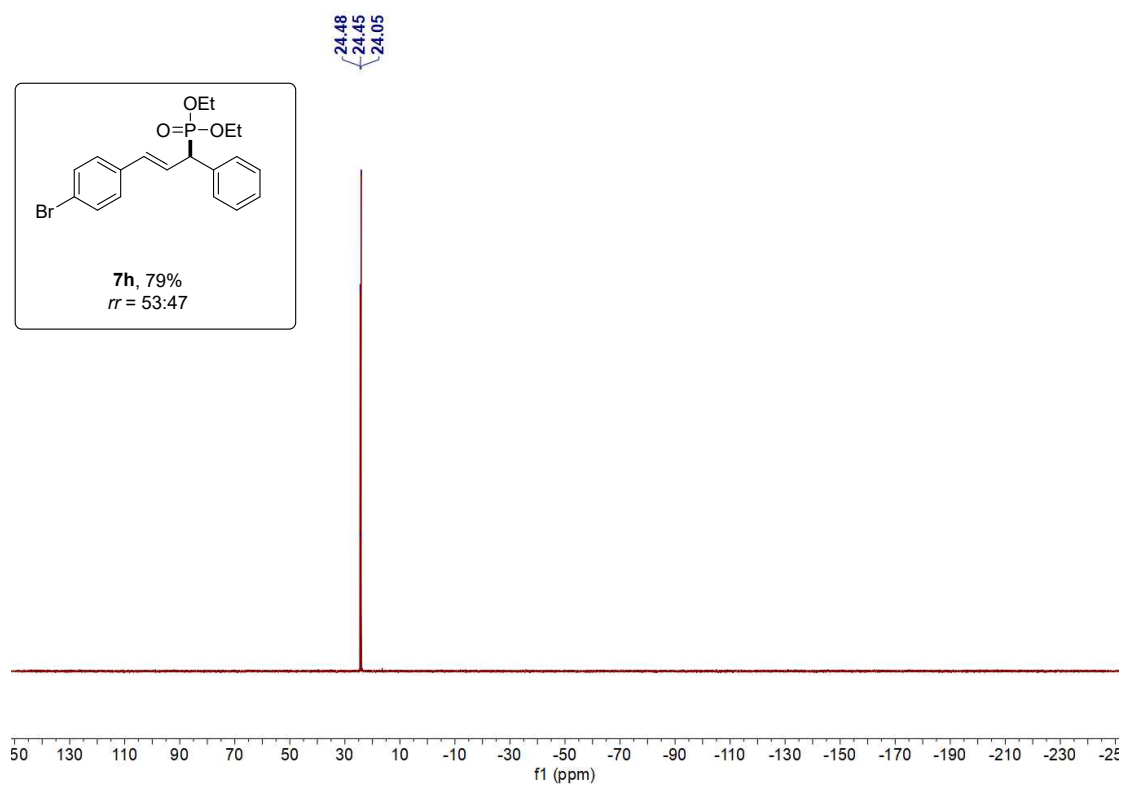

# diethyl (E)-(3-([1,1'-biphenyl]-4-yl)-1-phenylallyl)phosphonate (7i)

<sup>1</sup>H NMR (500 MHz, Chloroform-d)

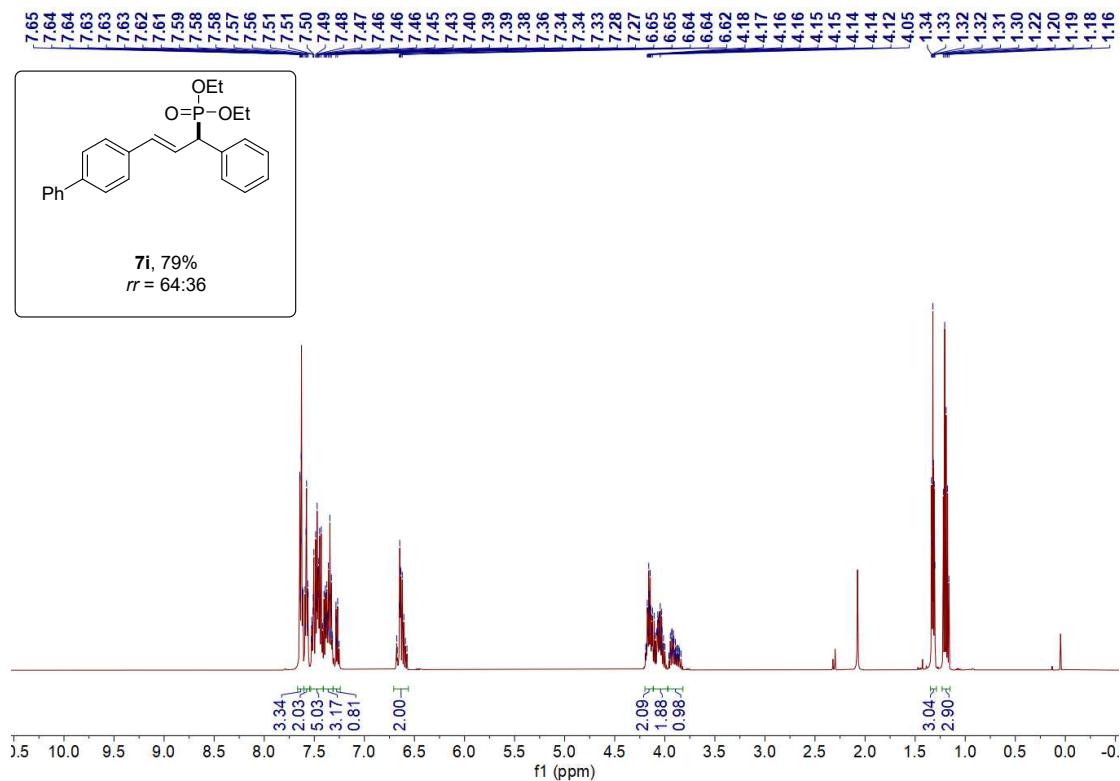

<sup>13</sup>C NMR (126 MHz, Chloroform-d)

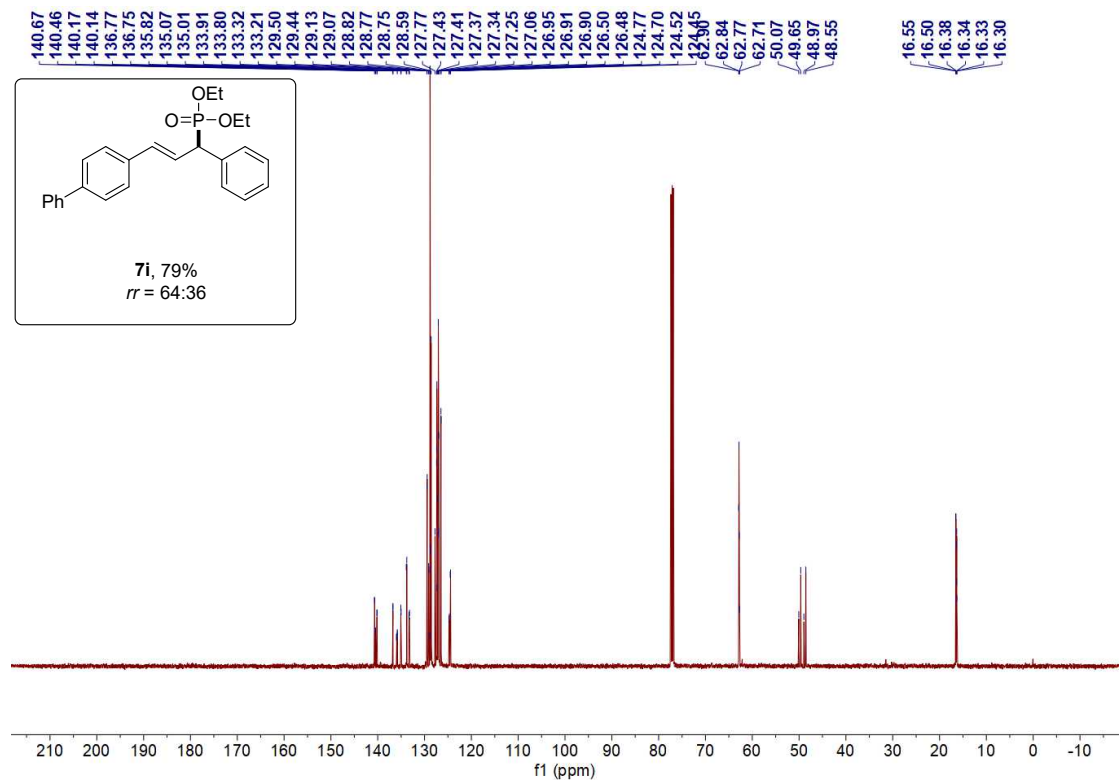

**<sup>31</sup>P NMR (202 MHz, Chloroform-d)**

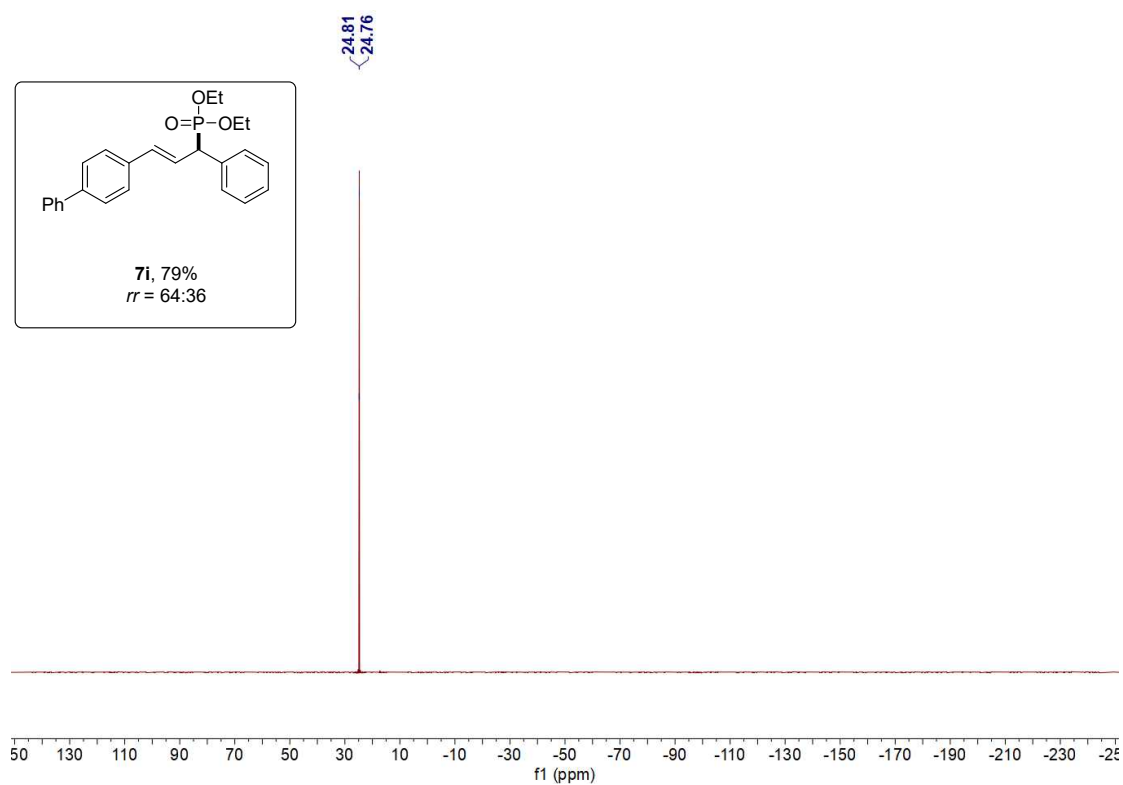

**diethyl ((2E,4E)-1,5-diphenylpenta-2,4-dien-1-yl)phosphonate (7j)**

**<sup>1</sup>H NMR (500 MHz, Chloroform-d)**

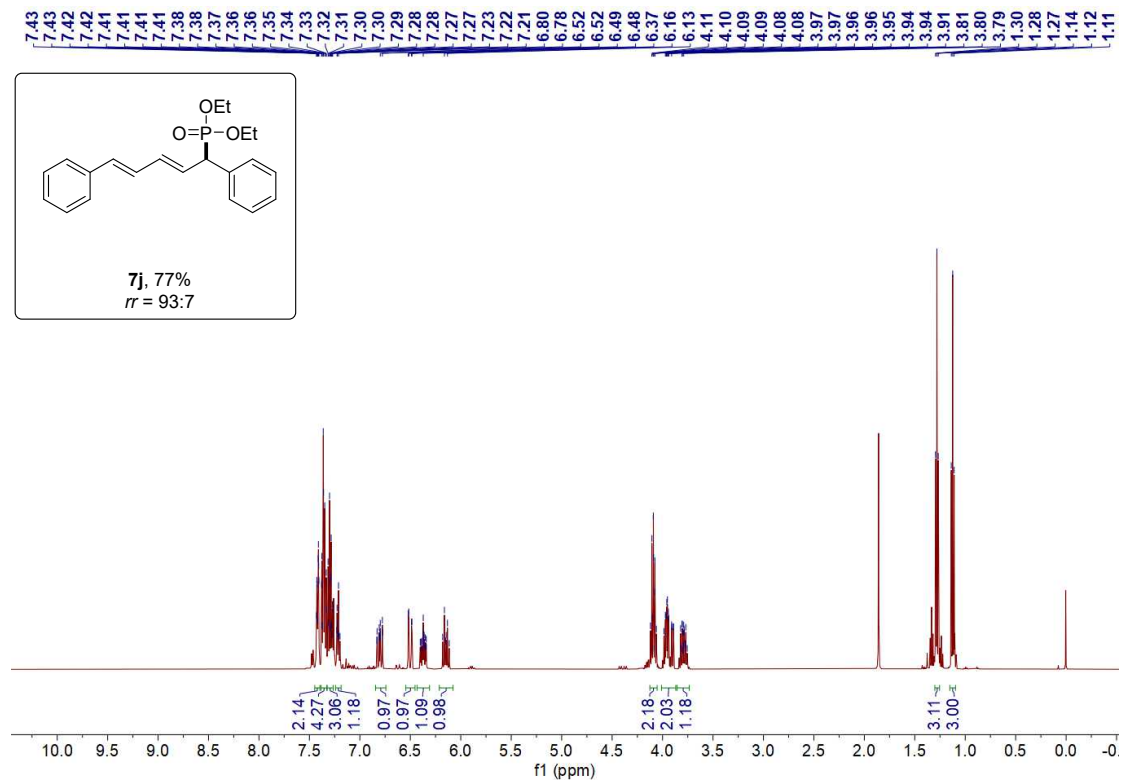

**<sup>13</sup>C NMR (126 MHz, Chloroform-d)**

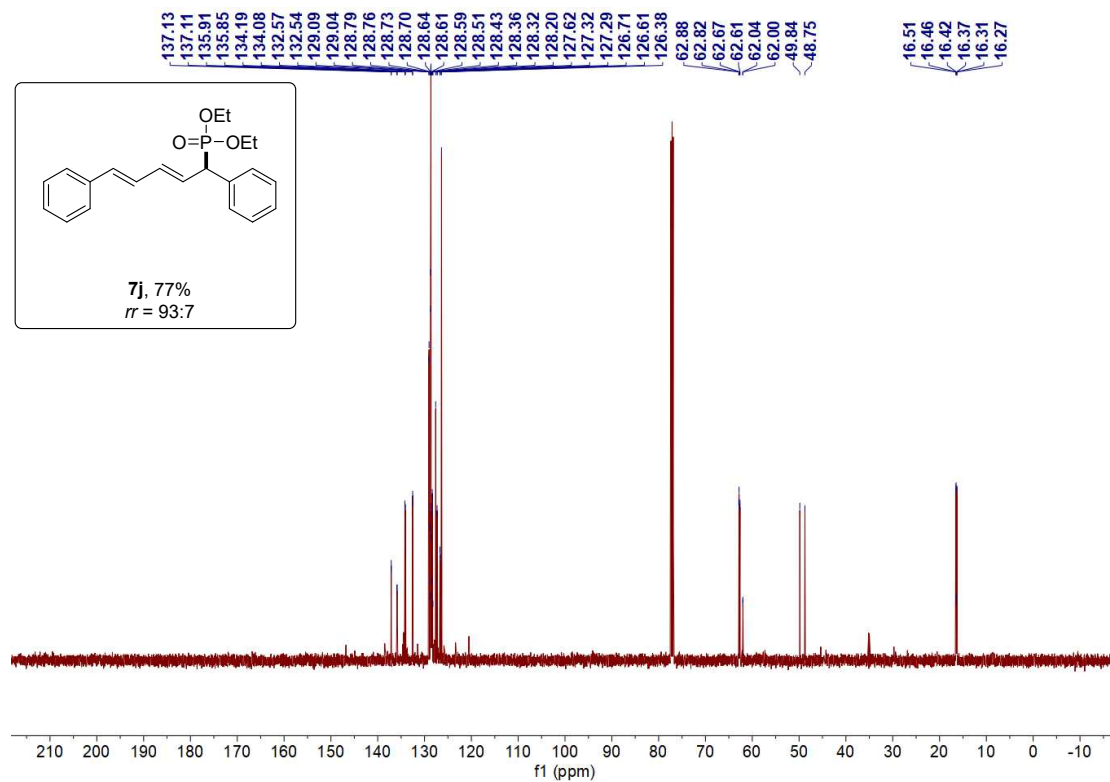

**<sup>31</sup>P NMR (202 MHz, Chloroform-d)**

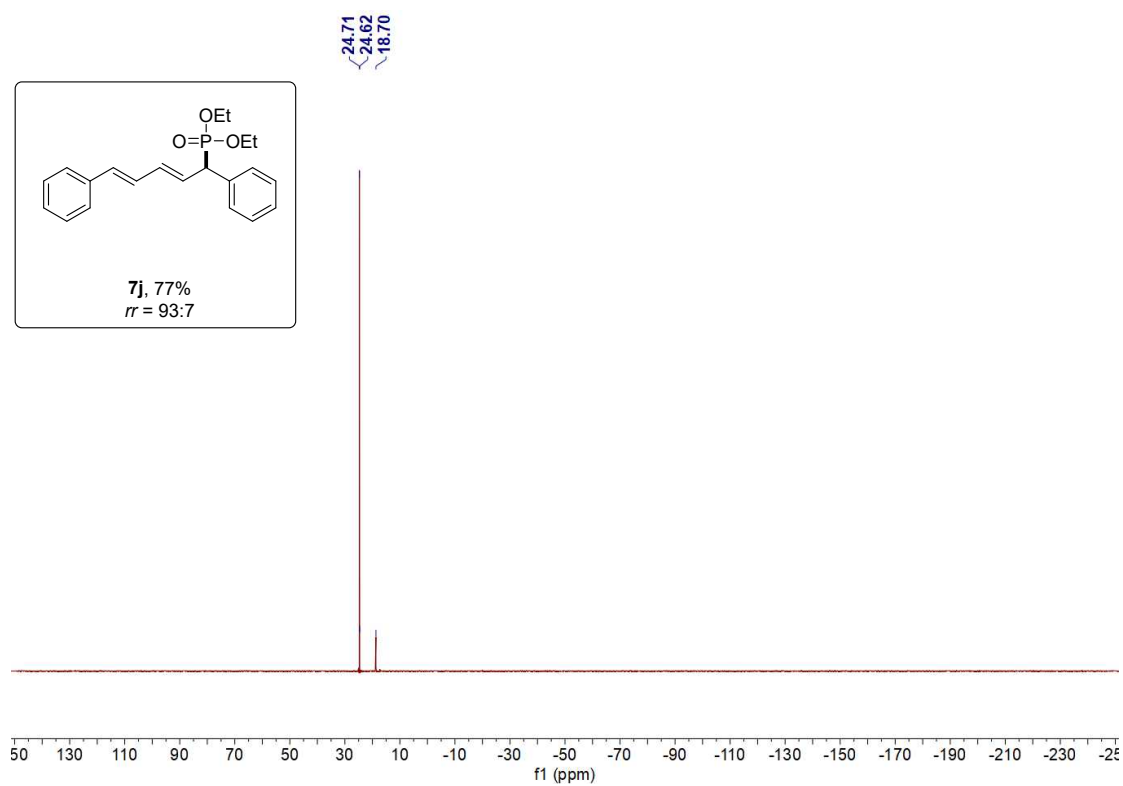

# 1-(difluoromethyl)-1H-benzo[d]imidazole

<sup>1</sup>H NMR (500 MHz, Chloroform-d)

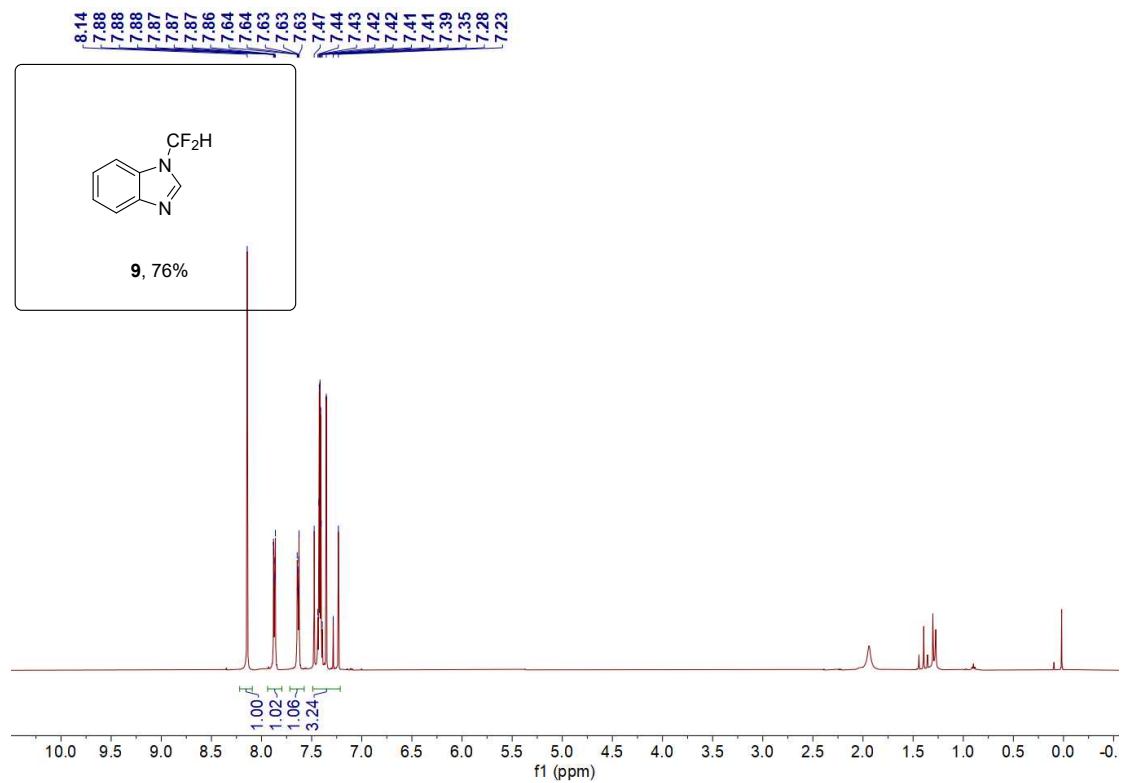

<sup>13</sup>C NMR (126 MHz, Chloroform-d)

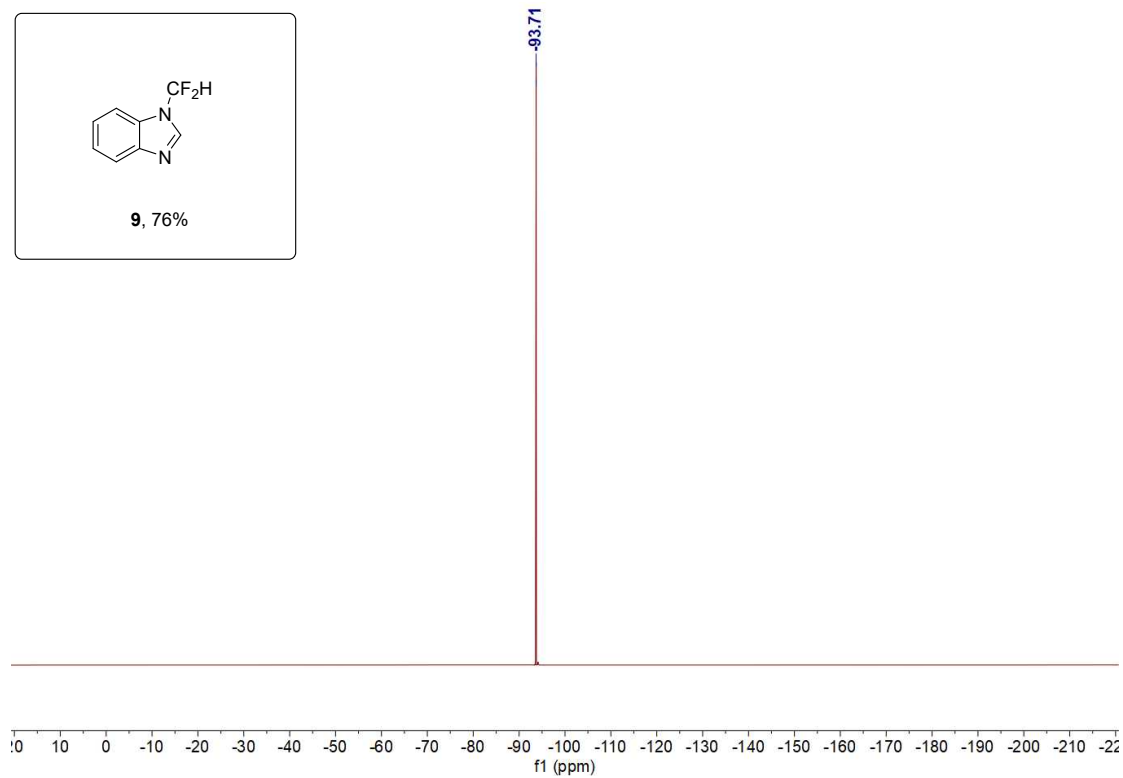

**(S)-(4-phenylbut-3-yn-2-yl)(p-tolyl)sulfane**

**<sup>1</sup>H NMR (126 MHz, Chloroform-d)**

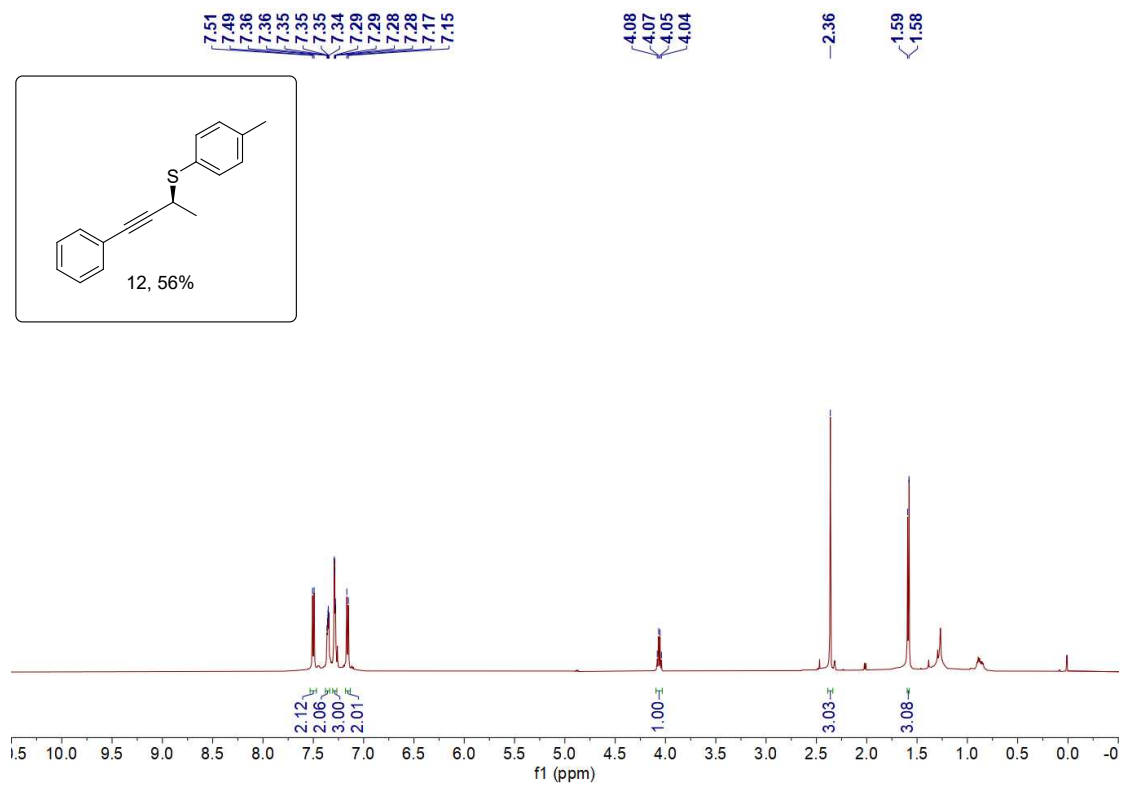

**<sup>13</sup>C NMR (126 MHz, Chloroform-d)**

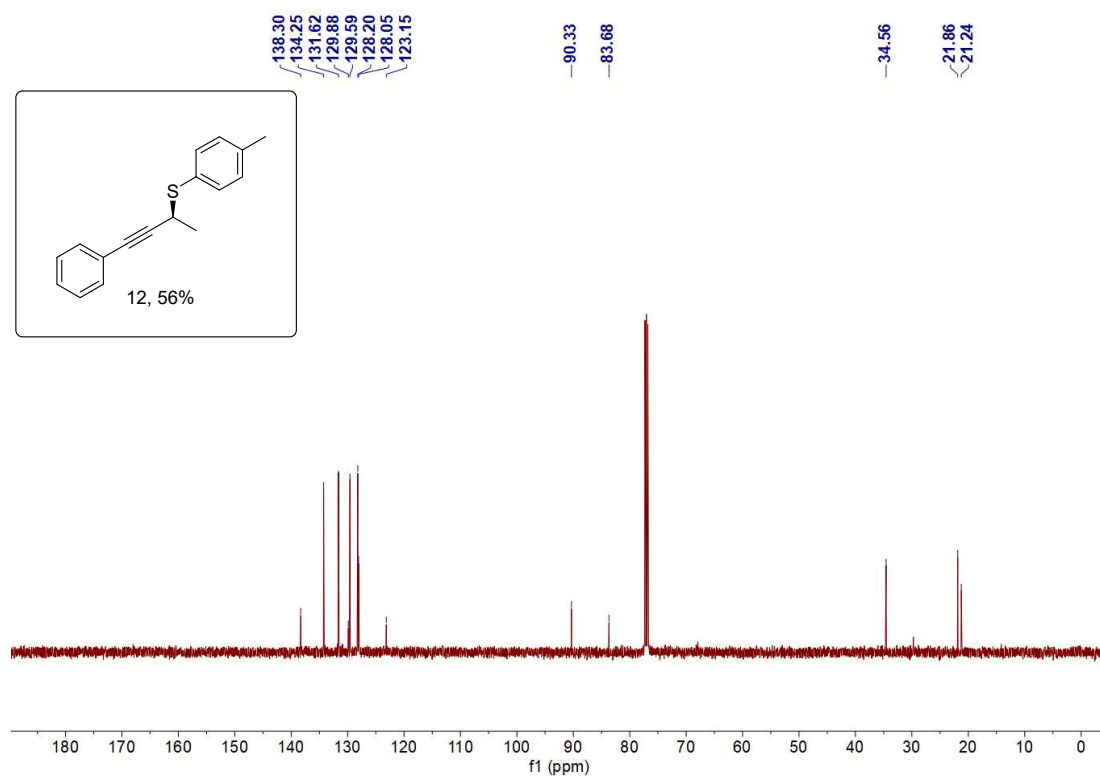



## 2.5 HPLC spectra

<色谱图>

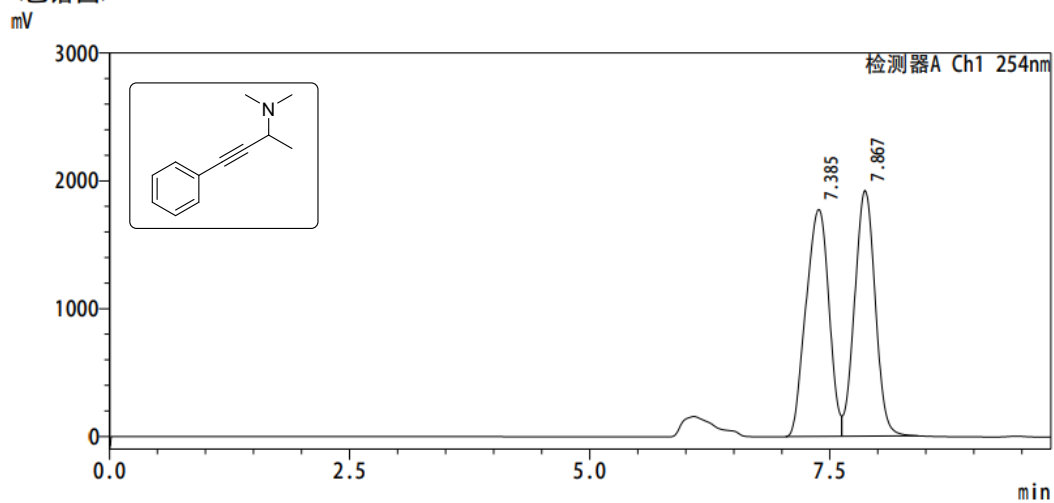

<峰表>

检测器A Ch1 254nm

| 峰号 | 保留时间  | 面积%     |
|----|-------|---------|
| 1  | 7.385 | 50.814  |
| 2  | 7.867 | 49.186  |
| 总计 |       | 100.000 |

<色谱图>

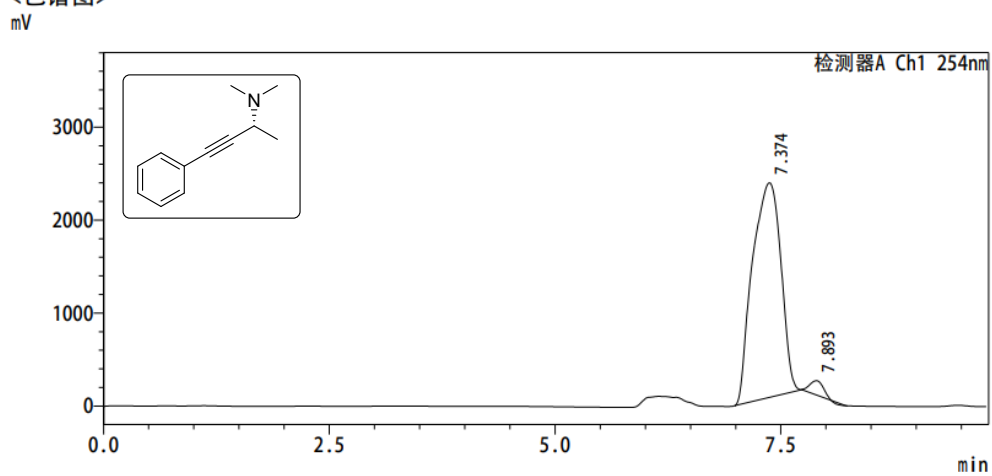

<峰表>

检测器A Ch1 254nm

| 峰号 | 保留时间  | 面积%     |
|----|-------|---------|
| 1  | 7.374 | 97.259  |
| 2  | 7.893 | 2.741   |
| 总计 |       | 100.000 |

<色谱图>

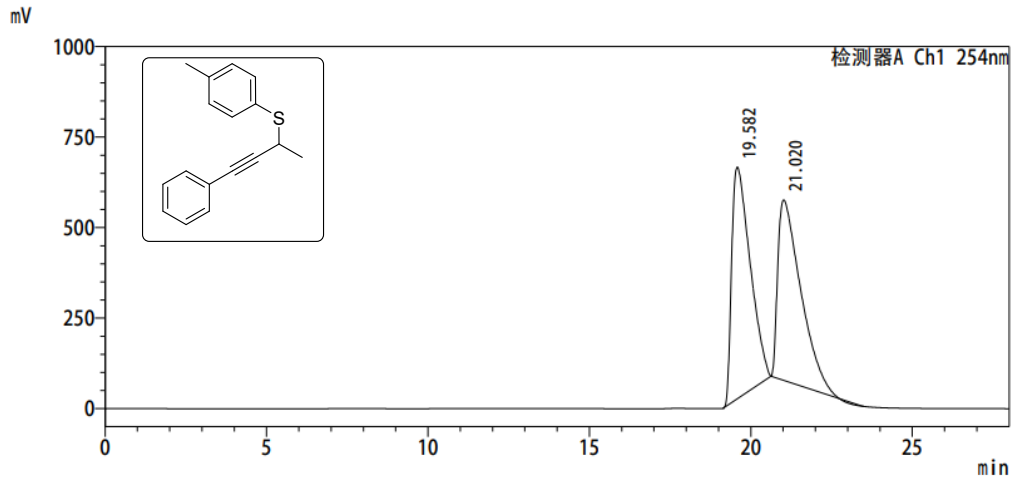

<峰表>

检测器A Ch1 254nm

| 峰号 | 保留时间   | 面积%     |
|----|--------|---------|
| 1  | 19.582 | 50.635  |
| 2  | 21.020 | 49.365  |
| 总计 |        | 100.000 |

<色谱图>

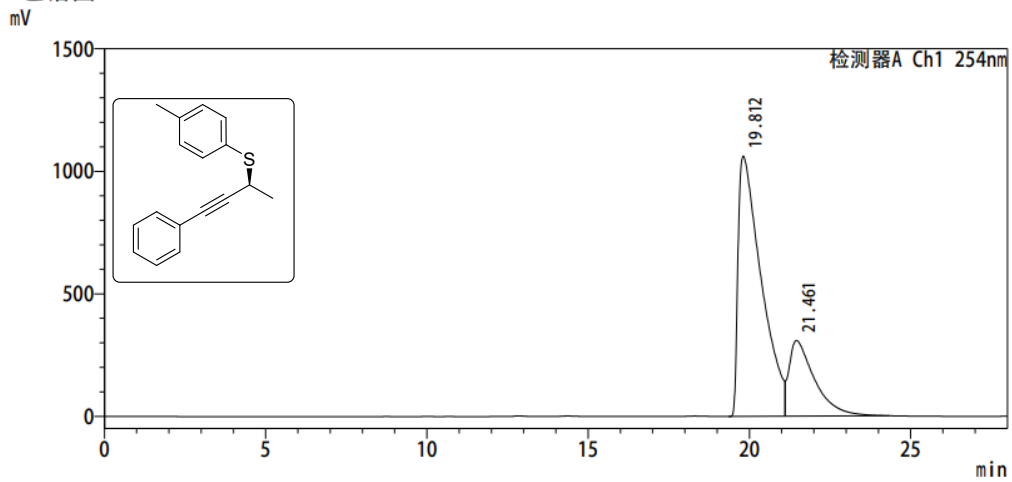

<峰表>

检测器A Ch1 254nm

| 峰号 | 保留时间   | 面积%     |
|----|--------|---------|
| 1  | 19.812 | 75.632  |
| 2  | 21.461 | 24.368  |
| 总计 |        | 100.000 |

## 2.6 References

- [1]. Zhou, X.; Zhang, G.; Huang, R.; Huang, H., Palladium-Catalyzed Allyl-Allyl Reductive Coupling of Allylamines or Allylic Alcohols with H<sub>2</sub> as Sole Reductant. *Org Lett* **2021**, *23*, 365-369.
- [2]. Guisán-Ceinos, M.; Martín-Heras, V.; Tortosa, M., Regio- and Stereospecific Copper-Catalyzed Substitution Reaction of Propargylic Ammonium Salts with Aryl Grignard Reagents. *J. Am. Chem. Soc.* **2017**, *139*, 8448-8451.
- [3]. Zhu, M.; Zheng, C.; Zhang, X.; You, S.-L., Synthesis of Cyclobutane-Fused Angular Tetracyclic Spiroindolines via Visible-Light-Promoted Intramolecular Dearomatization of Indole Derivatives. *Journal of the American Chemical Society* **2019**, *141*, 2636-2644.
- [4]. Zhang, X.; Xu, A.; Ran, Y.; Wei, C.; Xie, F.; Wu, J., Design, synthesis and biological evaluation of phenyl vinyl sulfone based NLRP3 inflammasome inhibitors. *Bioorganic Chemistry* **2022**, *128*, 106010.
